# Supplementary material for: Analysis of RNA cleavage by MALDI-TOF mass spectrometry
Source: PubMed Central journal article supplement — Nucleic Acids Res. 2012 Aug 30;41(1):e2. doi: 10.1093/nar/gks811 (PMC3592410; doi:10.1093/nar/gks811), 2012-08-30
Supplement: supp_gks811_nar-01253-met-f-2012-File002.pdf [file supp_gks811_nar-01253-met-f-2012-File002.pdf]

## **SUPPORTING MATERIAL**

### **Analysis of RNA Cleavage by MALDI-TOF Mass Spectrometry**

Jeff C. Joyner,<sup>1,2</sup> Kevin D. Keuper,<sup>1</sup> and J. A. Cowan<sup>1,2,3\*</sup>

Contribution from <sup>1</sup> Evans Laboratory of Chemistry, Ohio State University, 100 West 18th Avenue, Columbus, Ohio 43210; <sup>2</sup> The Ohio State Biochemistry Program, 784 Biological Sciences 484 W. 12th Avenue, Columbus, Ohio 43210; and <sup>3</sup> MetalloPharm LLC, 1790 Riverstone Drive, Delaware, OH 43015

## **Table of Contents for Supporting Information**

- 1) MALDI-TOF MS spectra and method development
  - a. Fl-RRE RNA: List of predicted masses for monitored cleavage products
  - b. Fl-16S RNA: List of predicted masses for monitored cleavage products
  - c. RRE RNA (unlabeled): List of predicted masses for monitored cleavage products
  - d. Peak assignment: mass matching tolerance and example of mass matching
  - e. Fl-RRE RNA after 1 h incubation with coreactants (control)
  - f. Fl-RRE RNA with vs without added Fe-EDTA-Rev, after 1 h incubation
  - g. calibration mixture and mass bias
  - h. Peak assignment: distribution of mass-matching errors
  - i. Peak assignment: abundance threshold for detection
  - j. Comparison of desalting techniques
    - i. ZipTip protocol variations
    - ii. Ethanol precipitation vs regular ZipTip purification
  - k. MALDI-induced fragmentation vs base composition
- 2) Comparison of kinetics monitored by MALDI-TOF MS vs PAGE vs fluorimetry
  - a. Fl-RRE RNA reactions
    - i. Mass spectra
    - ii. Comparison of MALDI-monitored to AP-RNA- and PAGE-monitored reactions
  - b. Fl-16S RNA reactions
    - i. Mass spectra
    - ii. PAGE fits
    - iii. Single-cleavage site reaction (MALDI vs PAGE)
- 3) Fl-RRE RNA: Initial rates of formation of scission products, organized by overhang type and position within the RNA sequence
  - a. Cleavage by Fe-EDTA-Rev
  - b. Cleavage in the absence of catalyst
- 4) Fl-16S RNA: Initial rates of formation of scission products, organized by overhang type and position within the RNA sequence
  - a. Cleavage by Cu-GGH
  - b. Cleavage in the absence of catalyst
- 5) Comparison of unlabeled RRE with Fl-RRE RNA
  - a. Cleavage by Fe-EDTA-Rev
  - b. Cleavage by Cu-NTA-Rev
- 6) Proposed Mechanisms of Product Formation
  - a. 2'-OH-mediated endonucleolysis vs hydrolysis
  - b. H-4 abstraction
  - c. H-5 abstraction
- 7) Automated peak assignment for MALDI TOF mass spectra
  - a. MassDaddy – Perl script
- 8) Miscellaneous
  - a. Common MALDI instrument resolution and mass ranges

| Nascent 3' Overhangs |            |                      |            |              |            |                     |            | Nascent 5' Overhangs |            |              |            |
|----------------------|------------|----------------------|------------|--------------|------------|---------------------|------------|----------------------|------------|--------------|------------|
| 3'-OH                |            | 2,3-cyclic phosphate |            | 3'-phosphate |            | 3'-phosphoglycolate |            | 5'-OH                |            | 5'-phosphate |            |
| m/z (Da)             | nucl. pos. | m/z (Da)             | nucl. pos. | m/z (Da)     | nucl. pos. | m/z (Da)            | nucl. pos. | m/z (Da)             | nucl. pos. | m/z (Da)     | nucl. pos. |
| <b>12171.52</b>      | <b>36</b>  |                      |            |              |            |                     |            |                      |            |              |            |
| 11866.34             | 35         | 11928.3              | 35         | 11946.32     | 35         | 12004.36            | 35         | 11327.86             | 2          | 11407.84     | 2          |
| 11561.16             | 34         | 11623.12             | 34         | 11641.14     | 34         | 11699.18            | 34         | 11021.7              | 3          | 11101.68     | 3          |
| 11215.95             | 33         | 11277.91             | 33         | 11295.93     | 33         | 11353.97            | 33         | 10676.49             | 4          | 10756.47     | 4          |
| 10870.74             | 32         | 10932.7              | 32         | 10950.72     | 32         | 11008.76            | 32         | 10331.28             | 5          | 10411.26     | 5          |
| 10541.53             | 31         | 10603.49             | 31         | 10621.51     | 31         | 10679.55            | 31         | 10025.11             | 6          | 10105.09     | 6          |
| 10236.35             | 30         | 10298.31             | 30         | 10316.33     | 30         | 10374.37            | 30         | 9719.93              | 7          | 9799.91      | 7          |
| 9907.14              | 29         | 9969.1               | 29         | 9987.12      | 29         | 10045.16            | 29         | 9413.76              | 8          | 9493.74      | 8          |
| 9600.97              | 28         | 9662.93              | 28         | 9680.95      | 28         | 9738.99             | 28         | 9068.55              | 9          | 9148.53      | 9          |
| 9255.76              | 27         | 9317.72              | 27         | 9335.74      | 27         | 9393.78             | 27         | 8723.34              | 10         | 8803.32      | 10         |
| 8910.55              | 26         | 8972.51              | 26         | 8990.53      | 26         | 9048.57             | 26         | 8378.13              | 11         | 8458.11      | 11         |
| 8605.37              | 25         | 8667.33              | 25         | 8685.35      | 25         | 8743.39             | 25         | 8072.95              | 12         | 8152.93      | 12         |
| 8276.16              | 24         | 8338.12              | 24         | 8356.14      | 24         | 8414.18             | 24         | 7727.74              | 13         | 7807.72      | 13         |
| 7930.95              | 23         | 7992.91              | 23         | 8010.93      | 23         | 8068.97             | 23         | 7422.56              | 14         | 7502.54      | 14         |
| 7624.78              | 22         | 7686.74              | 22         | 7704.76      | 22         | 7762.8              | 22         | 7093.35              | 15         | 7173.33      | 15         |
| 7319.6               | 21         | 7381.56              | 21         | 7399.58      | 21         | 7457.62             | 21         | 6748.14              | 16         | 6828.12      | 16         |
| 6974.39              | 20         | 7036.35              | 20         | 7054.37      | 20         | 7112.41             | 20         | 6442.96              | 17         | 6522.94      | 17         |
| 6645.18              | 19         | 6707.14              | 19         | 6725.16      | 19         | 6783.2              | 19         | 6097.75              | 18         | 6177.73      | 18         |
| 6315.97              | 18         | 6377.93              | 18         | 6395.95      | 18         | 6453.99             | 18         | <b>5792.57</b>       | <b>19</b>  | 5872.55      | 19         |
| 6010.79              | 17         | 6072.75              | 17         | 6090.77      | 17         | 6148.81             | 17         | 5463.36              | 20         | 5543.34      | 20         |
| 5665.58              | 16         | 5727.54              | 16         | 5745.56      | 16         | 5803.6              | 16         | 5134.15              | 21         | 5214.13      | 21         |
| 5360.39              | 15         | 5422.35              | 15         | 5440.37      | 15         | 5498.41             | 15         | 4788.94              | 22         | 4868.92      | 22         |
| 5015.18              | 14         | 5077.14              | 14         | 5095.16      | 14         | 5153.2              | 14         | 4483.76              | 23         | 4563.74      | 23         |
| 4685.97              | 13         | <b>4747.93</b>       | <b>13</b>  | 4765.95      | 13         | 4823.99             | 13         | 4177.59              | 24         | 4257.57      | 24         |
| 4380.79              | 12         | 4442.75              | 12         | 4460.77      | 12         | 4518.81             | 12         | 3832.38              | 25         | 3912.36      | 25         |
| 4035.58              | 11         | 4097.54              | 11         | 4115.56      | 11         | 4173.6              | 11         | 3503.17              | 26         | 3583.15      | 26         |
| 3730.4               | 10         | 3792.36              | 10         | 3810.38      | 10         | 3868.42             | 10         | 3197.99              | 27         | 3277.97      | 27         |
| 3385.19              | 9          | 3447.15              | 9          | 3465.17      | 9          | 3523.21             | 9          | 2852.78              | 28         | 2932.76      | 28         |
| 3039.98              | 8          | <b>3101.94</b>       | <b>8</b>   | 3119.96      | 8          | 3178                | 8          | 2507.57              | 29         | 2587.55      | 29         |
| 2694.77              | 7          | <b>2756.73</b>       | <b>7</b>   | 2774.75      | 7          | 2832.79             | 7          | <b>2201.4</b>        | <b>30</b>  | 2281.38      | 30         |
| 2388.6               | 6          | <b>2450.56</b>       | <b>6</b>   | 2468.58      | 6          | 2526.62             | 6          | 1872.19              | 31         | 1952.17      | 31         |
| 2083.42              | 5          | <b>2145.38</b>       | <b>5</b>   | 2163.4       | 5          | 2221.44             | 5          | <b>1567.01</b>       | <b>32</b>  | 1646.99      | 32         |
| 1777.25              | 4          | 1839.21              | 4          | 1857.23      | 4          | 1915.27             | 4          | 1237.8               | 33         | 1317.78      | 33         |
| 1432.04              | 3          | <b>1494</b>          | <b>3</b>   | 1512.02      | 3          | 1570.06             | 3          | 892.59               | 34         | 972.57       | 34         |
| 1086.83              | 2          | 1148.79              | 2          | 1166.81      | 2          | 1224.85             | 2          | 547.38               | 35         | 627.36       | 35         |
| 780.66               | 1          | 842.62               | 1          | 860.64       | 1          | 918.68              | 1          | 242.2                | 36         | 322.18       | 36         |

**Table SM1.** Predicted masses for products ions ( $z = -1$ ) resulting from cleavage of Fl-RRE RNA (36-mer). The predicted masses shown here correspond to  $[\text{RNA}]^{-1}$  fragments terminated with one of the listed nascent overhangs, at one of the positions shown. These masses were used for assignment of peaks in mass spectra. All fragments with nascent 3' overhangs were terminated at the 5' end with fluorescein; all fragments with nascent 5' overhangs were terminated at the 3' end with a 3'-hydroxyl group. The Fl-RRE RNA is similarly terminated at the 5' end with fluorescein and at the 3' end with a 3'-hydroxyl group (unreacted;  $m/z = 12171.53$  Da). Peaks used for internal calibration are shown in bold (also included  $[\text{Fl-RRE} - 2\text{H}]^{-2}$  with  $m/z = 6085.26$  Da).

| Nascent 3' Overhangs |            |                      |            |              |            |                     |            | Nascent 5' Overhangs |            |              |            |
|----------------------|------------|----------------------|------------|--------------|------------|---------------------|------------|----------------------|------------|--------------|------------|
| 3'-OH                |            | 2,3-cyclic phosphate |            | 3'-phosphate |            | 3'-phosphoglycolate |            | 5'-OH                |            | 5'-phosphate |            |
| m/z (Da)             | nucl. pos. | m/z (Da)             | nucl. pos. | m/z (Da)     | nucl. pos. | m/z (Da)            | nucl. pos. | m/z (Da)             | nucl. pos. | m/z (Da)     | nucl. pos. |
| <b>9175.71</b>       | <b>27</b>  |                      |            |              |            |                     |            |                      |            |              |            |
| 8870.53              | 26         | 8932.49              | 26         | 8950.51      | 26         | 9008.55             | 26         | 8293.02              | 2          | 8373         | 2          |
| 8565.35              | 25         | 8627.31              | 25         | 8645.33      | 25         | 8703.37             | 25         | 7947.81              | 3          | 8027.79      | 3          |
| 8220.14              | 24         | 8282.1               | 24         | 8300.12      | 24         | 8358.16             | 24         | 7642.63              | 4          | 7722.61      | 4          |
| 7914.96              | 23         | 7976.92              | 23         | 7994.94      | 23         | 8052.98             | 23         | 7297.42              | 5          | 7377.4       | 5          |
| 7608.79              | 22         | 7670.75              | 22         | 7688.77      | 22         | 7746.81             | 22         | 6991.25              | 6          | 7071.23      | 6          |
| 7263.58              | 21         | 7325.54              | 21         | 7343.56      | 21         | 7401.6              | 21         | 6686.07              | 7          | 6766.05      | 7          |
| 6934.37              | 20         | 6996.33              | 20         | 7014.35      | 20         | 7072.39             | 20         | 6356.86              | 8          | 6436.84      | 8          |
| 6605.16              | 19         | 6667.12              | 19         | 6685.14      | 19         | 6743.18             | 19         | 6051.68              | 9          | 6131.66      | 9          |
| 6259.95              | 18         | 6321.91              | 18         | 6339.93      | 18         | 6397.97             | 18         | 5722.47              | 10         | 5802.45      | 10         |
| 5953.78              | 17         | 6015.74              | 17         | 6033.76      | 17         | 6091.8              | 17         | 5417.29              | 11         | 5497.27      | 11         |
| 5608.57              | 16         | 5670.53              | 16         | 5688.55      | 16         | 5746.59             | 16         | 5112.11              | 12         | 5192.09      | 12         |
| 5263.36              | 15         | 5325.32              | 15         | 5343.34      | 15         | 5401.38             | 15         | 4805.94              | 13         | 4885.92      | 13         |
| 4918.15              | 14         | 4980.11              | 14         | 4998.13      | 14         | 5056.17             | 14         | 4499.77              | 14         | 4579.75      | 14         |
| 4612.97              | 13         | 4674.93              | 13         | 4692.95      | 13         | 4750.99             | 13         | 4194.58              | 15         | 4274.56      | 15         |
| 4306.8               | 12         | 4368.76              | 12         | 4386.78      | 12         | 4444.82             | 12         | 3849.37              | 16         | 3929.35      | 16         |
| 4000.63              | 11         | 4062.59              | 11         | 4080.61      | 11         | 4138.65             | 11         | 3504.16              | 17         | 3584.14      | 17         |
| 3695.45              | 10         | 3757.41              | 10         | 3775.43      | 10         | 3833.47             | 10         | <b>3158.95</b>       | <b>18</b>  | 3238.93      | 18         |
| 3390.26              | 9          | 3452.22              | 9          | 3470.24      | 9          | 3528.28             | 9          | 2852.78              | 19         | 2932.76      | 19         |
| 3061.05              | 8          | <b>3123.01</b>       | <b>8</b>   | 3141.03      | 8          | 3199.07             | 8          | 2507.57              | 20         | 2587.55      | 20         |
| 2755.87              | 7          | 2817.83              | 7          | 2835.85      | 7          | 2893.89             | 7          | 2178.36              | 21         | 2258.34      | 21         |
| 2426.66              | 6          | <b>2488.62</b>       | <b>6</b>   | 2506.64      | 6          | 2564.68             | 6          | 1849.15              | 22         | 1929.13      | 22         |
| 2121.48              | 5          | 2183.44              | 5          | 2201.46      | 5          | 2259.5              | 5          | 1503.94              | 23         | 1583.92      | 23         |
| 1815.31              | 4          | <b>1877.27</b>       | <b>4</b>   | 1895.29      | 4          | 1953.33             | 4          | 1197.77              | 24         | 1277.75      | 24         |
| 1470.1               | 3          | 1532.06              | 3          | 1550.08      | 3          | 1608.12             | 3          | 892.59               | 25         | 972.57       | 25         |
| 1164.92              | 2          | <b>1226.88</b>       | <b>2</b>   | 1244.9       | 2          | 1302.94             | 2          | 547.38               | 26         | 627.36       | 26         |
| 819.71               | 1          | 881.67               | 1          | 899.69       | 1          | 957.73              | 1          | 242.2                | 27         | 322.18       | 27         |

**Table SM2.** Predicted masses for products ions ( $z = -1$ ) resulting from cleavage of Fl-16S RNA (27-mer). The predicted masses shown here correspond to  $[\text{RNA}]^{-1}$  fragments terminated with one of the listed nascent overhangs, at one of the positions shown. These masses were used for assignment of peaks in mass spectra. All fragments with nascent 3' overhangs were terminated at the 5' end with fluorescein; all fragments with nascent 5' overhangs were terminated at the 3' end with a 3'-hydroxyl group. The Fl-16S RNA is similarly terminated at the 5' end with fluorescein and at the 3' end with a 3'-hydroxyl group (unreacted;  $m/z = 9175.71$  Da). Peaks used for internal calibration are shown in bold (also included  $[\text{Fl-16S} - 2\text{H}]^{-2}$  with  $m/z = 4587.35$  Da).

| Nascent 3' Overhangs |            |                      |            |              |            |                     |            | Nascent 5' Overhangs |            |              |            |
|----------------------|------------|----------------------|------------|--------------|------------|---------------------|------------|----------------------|------------|--------------|------------|
| 3'-OH                |            | 2,3-cyclic phosphate |            | 3'-phosphate |            | 3'-phosphoglycolate |            | 5'-OH                |            | 5'-phosphate |            |
| m/z (Da)             | nucl. pos. | m/z (Da)             | nucl. pos. | m/z (Da)     | nucl. pos. | m/z (Da)            | nucl. pos. | m/z (Da)             | nucl. pos. | m/z (Da)     | nucl. pos. |
| 282.22               | 1          | 344.18               | 1          | 362.2        | 1          | 420.24              | 1          | 11021.7              | 1          |              |            |
| 627.43               | 2          | 689.39               | 2          | 707.41       | 2          | 765.45              | 2          | 10676.49             | 2          | 10756.47     | 2          |
| 933.6                | 3          | 995.56               | 3          | 1013.58      | 3          | 1071.62             | 3          | 10331.28             | 3          | 10411.26     | 3          |
| 1238.78              | 4          | 1300.74              | 4          | 1318.76      | 4          | 1376.8              | 4          | 10025.11             | 4          | 10105.09     | 4          |
| 1544.95              | 5          | 1606.91              | 5          | 1624.93      | 5          | 1682.97             | 5          | 9719.93              | 5          | 9799.91      | 5          |
| 1890.16              | 6          | 1952.12              | 6          | 1970.14      | 6          | 2028.18             | 6          | 9413.76              | 6          | 9493.74      | 6          |
| 2235.37              | 7          | 2297.33              | 7          | 2315.35      | 7          | 2373.39             | 7          | 9068.55              | 7          | 9148.53      | 7          |
| 2580.58              | 8          | 2642.54              | 8          | 2660.56      | 8          | 2718.6              | 8          | 8723.34              | 8          | 8803.32      | 8          |
| 2885.76              | 9          | 2947.72              | 9          | 2965.74      | 9          | 3023.78             | 9          | 8378.13              | 9          | 8458.11      | 9          |
| 3230.97              | 10         | 3292.93              | 10         | 3310.95      | 10         | 3368.99             | 10         | 8072.95              | 10         | 8152.93      | 10         |
| 3536.15              | 11         | 3598.11              | 11         | 3616.13      | 11         | 3674.17             | 11         | 7727.74              | 11         | 7807.72      | 11         |
| 3865.36              | 12         | 3927.32              | 12         | 3945.34      | 12         | 4003.38             | 12         | 7422.56              | 12         | 7502.54      | 12         |
| 4210.57              | 13         | 4272.53              | 13         | 4290.55      | 13         | 4348.59             | 13         | 7093.35              | 13         | 7173.33      | 13         |
| 4515.76              | 14         | 4577.72              | 14         | 4595.74      | 14         | 4653.78             | 14         | 6748.14              | 14         | 6828.12      | 14         |
| 4860.97              | 15         | 4922.93              | 15         | 4940.95      | 15         | 4998.99             | 15         | 6442.96              | 15         | 6522.94      | 15         |
| 5166.15              | 16         | 5228.11              | 16         | 5246.13      | 16         | 5304.17             | 16         | 6097.75              | 16         | 6177.73      | 16         |
| 5495.36              | 17         | 5557.32              | 17         | 5575.34      | 17         | 5633.38             | 17         | 5792.57              | 17         | 5872.55      | 17         |
| 5824.57              | 18         | 5886.53              | 18         | 5904.55      | 18         | 5962.59             | 18         | 5463.36              | 18         | 5543.34      | 18         |
| 6169.78              | 19         | 6231.74              | 19         | 6249.76      | 19         | 6307.8              | 19         | 5134.15              | 19         | 5214.13      | 19         |
| 6474.96              | 20         | 6536.92              | 20         | 6554.94      | 20         | 6612.98             | 20         | 4788.94              | 20         | 4868.92      | 20         |
| 6781.13              | 21         | 6843.09              | 21         | 6861.11      | 21         | 6919.15             | 21         | 4483.76              | 21         | 4563.74      | 21         |
| 7126.34              | 22         | 7188.3               | 22         | 7206.32      | 22         | 7264.36             | 22         | 4177.59              | 22         | 4257.57      | 22         |
| 7455.55              | 23         | 7517.51              | 23         | 7535.53      | 23         | 7593.57             | 23         | 3832.38              | 23         | 3912.36      | 23         |
| 7760.73              | 24         | 7822.69              | 24         | 7840.71      | 24         | 7898.75             | 24         | 3503.17              | 24         | 3583.15      | 24         |
| 8105.94              | 25         | 8167.9               | 25         | 8185.92      | 25         | 8243.96             | 25         | 3197.99              | 25         | 3277.97      | 25         |
| 8451.15              | 26         | 8513.11              | 26         | 8531.13      | 26         | 8589.17             | 26         | 2852.78              | 26         | 2932.76      | 26         |
| 8757.32              | 27         | 8819.28              | 27         | 8837.3       | 27         | 8895.34             | 27         | 2507.57              | 27         | 2587.55      | 27         |
| 9086.53              | 28         | 9148.49              | 28         | 9166.51      | 28         | 9224.55             | 28         | 2201.4               | 28         | 2281.38      | 28         |
| 9391.71              | 29         | 9453.67              | 29         | 9471.69      | 29         | 9529.73             | 29         | 1872.19              | 29         | 1952.17      | 29         |
| 9720.92              | 30         | 9782.88              | 30         | 9800.9       | 30         | 9858.94             | 30         | 1567.01              | 30         | 1646.99      | 30         |
| 10066.13             | 31         | 10128.09             | 31         | 10146.11     | 31         | 10204.15            | 31         | 1237.8               | 31         | 1317.78      | 31         |
| 10411.34             | 32         | 10473.3              | 32         | 10491.32     | 32         | 10549.36            | 32         | 892.59               | 32         | 972.57       | 32         |
| 10716.52             | 33         | 10778.48             | 33         | 10796.5      | 33         | 10854.54            | 33         | 547.38               | 33         | 627.36       | 33         |
| 11021.7              | 34         |                      |            |              |            |                     |            | 242.2                | 34         | 322.18       | 34         |

**Table SM3.** Predicted masses for products ions ( $z = -1$ ) resulting from cleavage of unlabeled RRE RNA (34-mer). The predicted masses shown here correspond to  $[\text{RNA}]^{1-}$  fragments terminated with one of the listed nascent overhangs, at one of the positions shown. These masses were used for assignment of peaks in mass spectra. All fragments with nascent 3' overhangs were terminated at the 5' end with a 5'-hydroxyl group; all fragments with nascent 5' overhangs were terminated at the 3' end with a 3'-hydroxyl group. The full length RRE RNA is similarly terminated at both ends with hydroxyl groups.

| Mass-Matching Information |                    |                  | Product Assignment and Abundance |               |             |                    |
|---------------------------|--------------------|------------------|----------------------------------|---------------|-------------|--------------------|
| Theoretical Mass (Da)     | Observed Mass (Da) | Mass Error (ppm) | Nucleotide Position              | Overhang Type | Peak Area   | Peak Area Fraction |
| 780.66                    | no match           | no match         | 1                                | 3'-OH         | 0           | 0                  |
| 1086.83                   | no match           | no match         | 2                                | 3'-OH         | 0           | 0                  |
| 1432.04                   | no match           | no match         | 3                                | 3'-OH         | 0           | 0                  |
| 1777.25                   | no match           | no match         | 4                                | 3'-OH         | 0           | 0                  |
| 2083.42                   | no match           | no match         | 5                                | 3'-OH         | 0           | 0                  |
| 2388.6                    | no match           | no match         | 6                                | 3'-OH         | 0           | 0                  |
| 2694.77                   | no match           | no match         | 7                                | 3'-OH         | 0           | 0                  |
| 3039.98                   | no match           | no match         | 8                                | 3'-OH         | 0           | 0                  |
| 3385.19                   | no match           | no match         | 9                                | 3'-OH         | 0           | 0                  |
| 3730.4                    | no match           | no match         | 10                               | 3'-OH         | 0           | 0                  |
| 4035.58                   | no match           | no match         | 11                               | 3'-OH         | 0           | 0                  |
| 4380.79                   | no match           | no match         | 12                               | 3'-OH         | 0           | 0                  |
| 4685.97                   | no match           | no match         | 13                               | 3'-OH         | 0           | 0                  |
| 5015.18                   | no match           | no match         | 14                               | 3'-OH         | 0           | 0                  |
| 5360.39                   | no match           | no match         | 15                               | 3'-OH         | 0           | 0                  |
| 5665.58                   | no match           | no match         | 16                               | 3'-OH         | 0           | 0                  |
| 6010.79                   | no match           | no match         | 17                               | 3'-OH         | 0           | 0                  |
| 6315.97                   | no match           | no match         | 18                               | 3'-OH         | 0           | 0                  |
| 6645.18                   | no match           | no match         | 19                               | 3'-OH         | 0           | 0                  |
| 6974.39                   | no match           | no match         | 20                               | 3'-OH         | 0           | 0                  |
| 7319.6                    | no match           | no match         | 21                               | 3'-OH         | 0           | 0                  |
| 7624.78                   | no match           | no match         | 22                               | 3'-OH         | 0           | 0                  |
| 7930.95                   | no match           | no match         | 23                               | 3'-OH         | 0           | 0                  |
| 8276.16                   | no match           | no match         | 24                               | 3'-OH         | 0           | 0                  |
| 8605.37                   | no match           | no match         | 25                               | 3'-OH         | 0           | 0                  |
| 8910.55                   | no match           | no match         | 26                               | 3'-OH         | 0           | 0                  |
| 9255.76                   | no match           | no match         | 27                               | 3'-OH         | 0           | 0                  |
| 9600.97                   | no match           | no match         | 28                               | 3'-OH         | 0           | 0                  |
| 9907.14                   | no match           | no match         | 29                               | 3'-OH         | 0           | 0                  |
| 10236.35                  | no match           | no match         | 30                               | 3'-OH         | 0           | 0                  |
| 10541.53                  | no match           | no match         | 31                               | 3'-OH         | 0           | 0                  |
| 10870.74                  | no match           | no match         | 32                               | 3'-OH         | 0           | 0                  |
| 11215.95                  | no match           | no match         | 33                               | 3'-OH         | 0           | 0                  |
| 11561.16                  | no match           | no match         | 34                               | 3'-OH         | 0           | 0                  |
| 11866.34                  | no match           | no match         | 35                               | 3'-OH         | 0           | 0                  |
| 12171.52                  | 12171.55818        | 3.1              | 36                               | 3'-OH         | 1948.371456 | 0.008537898        |

|          |             |          |    |                      |             |             |
|----------|-------------|----------|----|----------------------|-------------|-------------|
| 842.62   | no match    | no match | 1  | 2,3-cyclic phosphate | 0           | 0           |
| 1148.79  | 1148.676728 | -98.6    | 2  | 2,3-cyclic phosphate | 19.9849813  | 8.75756E-05 |
| 1494     | 1494.177343 | 118.7    | 3  | 2,3-cyclic phosphate | 86.96068556 | 0.000381068 |
| 1839.21  | 1839.13182  | -42.5    | 4  | 2,3-cyclic phosphate | 71.38448349 | 0.000312812 |
| 2145.38  | 2145.700106 | 149.2    | 5  | 2,3-cyclic phosphate | 161.9090032 | 0.000709496 |
| 2450.56  | 2450.833115 | 111.5    | 6  | 2,3-cyclic phosphate | 1222.599179 | 0.005357514 |
| 2756.73  | no match    | no match | 7  | 2,3-cyclic phosphate | 0           | 0           |
| 3101.94  | 3102.406808 | 150.5    | 8  | 2,3-cyclic phosphate | 2015.349322 | 0.008831399 |
| 3447.15  | 3447.535372 | 111.8    | 9  | 2,3-cyclic phosphate | 546.5299809 | 0.002394932 |
| 3792.36  | 3792.399381 | 10.4     | 10 | 2,3-cyclic phosphate | 107.4578944 | 0.000470888 |
| 4097.54  | 4097.845766 | 74.6     | 11 | 2,3-cyclic phosphate | 119.5056344 | 0.000523682 |
| 4442.75  | no match    | no match | 12 | 2,3-cyclic phosphate | 0           | 0           |
| 4747.93  | 4748.310105 | 80.1     | 13 | 2,3-cyclic phosphate | 459.2131279 | 0.002012303 |
| 5077.14  | no match    | no match | 14 | 2,3-cyclic phosphate | 0           | 0           |
| 5422.35  | no match    | no match | 15 | 2,3-cyclic phosphate | 0           | 0           |
| 5727.54  | no match    | no match | 16 | 2,3-cyclic phosphate | 0           | 0           |
| 6072.75  | no match    | no match | 17 | 2,3-cyclic phosphate | 0           | 0           |
| 6377.93  | no match    | no match | 18 | 2,3-cyclic phosphate | 0           | 0           |
| 6707.14  | no match    | no match | 19 | 2,3-cyclic phosphate | 0           | 0           |
| 7036.35  | no match    | no match | 20 | 2,3-cyclic phosphate | 0           | 0           |
| 7381.56  | no match    | no match | 21 | 2,3-cyclic phosphate | 0           | 0           |
| 7686.74  | no match    | no match | 22 | 2,3-cyclic phosphate | 0           | 0           |
| 7992.91  | no match    | no match | 23 | 2,3-cyclic phosphate | 0           | 0           |
| 8338.12  | no match    | no match | 24 | 2,3-cyclic phosphate | 0           | 0           |
| 8667.33  | no match    | no match | 25 | 2,3-cyclic phosphate | 0           | 0           |
| 8972.51  | no match    | no match | 26 | 2,3-cyclic phosphate | 0           | 0           |
| 9317.72  | no match    | no match | 27 | 2,3-cyclic phosphate | 0           | 0           |
| 9662.93  | no match    | no match | 28 | 2,3-cyclic phosphate | 0           | 0           |
| 9969.1   | no match    | no match | 29 | 2,3-cyclic phosphate | 0           | 0           |
| 10298.31 | no match    | no match | 30 | 2,3-cyclic phosphate | 0           | 0           |
| 10603.49 | no match    | no match | 31 | 2,3-cyclic phosphate | 0           | 0           |
| 10932.7  | no match    | no match | 32 | 2,3-cyclic phosphate | 0           | 0           |
| 11277.91 | no match    | no match | 33 | 2,3-cyclic phosphate | 0           | 0           |
| 11623.12 | no match    | no match | 34 | 2,3-cyclic phosphate | 0           | 0           |
| 11928.3  | no match    | no match | 35 | 2,3-cyclic phosphate | 0           | 0           |
| NA       | no match    | no match | 36 | 2,3-cyclic phosphate | 0           | 0           |
| 860.64   | no match    | no match | 1  | 3'-phosphate         | 0           | 0           |
| 1166.81  | no match    | no match | 2  | 3'-phosphate         | 0           | 0           |
| 1512.02  | no match    | no match | 3  | 3'-phosphate         | 0           | 0           |
| 1857.23  | 1857.221253 | -4.7     | 4  | 3'-phosphate         | 691.5150369 | 0.003030266 |
| 2163.4   | 2163.515727 | 53.5     | 5  | 3'-phosphate         | 9132.265028 | 0.040018213 |

|          |             |          |    |                     |             |             |
|----------|-------------|----------|----|---------------------|-------------|-------------|
| 2468.58  | 2468.739643 | 64.7     | 6  | 3'-phosphate        | 15694.70981 | 0.068775297 |
| 2774.75  | 2774.987205 | 85.5     | 7  | 3'-phosphate        | 22471.69868 | 0.098472528 |
| 3119.96  | 3120.203586 | 78.1     | 8  | 3'-phosphate        | 15805.23257 | 0.069259615 |
| 3465.17  | 3465.353903 | 53.1     | 9  | 3'-phosphate        | 3946.3796   | 0.017293307 |
| 3810.38  | 3810.794395 | 108.8    | 10 | 3'-phosphate        | 429.0367276 | 0.001880068 |
| 4115.56  | 4116.120122 | 136.1    | 11 | 3'-phosphate        | 237.7550917 | 0.001041859 |
| 4460.77  | 4460.625181 | -32.5    | 12 | 3'-phosphate        | 126.0200837 | 0.000552229 |
| 4765.95  | 4766.488901 | 113.1    | 13 | 3'-phosphate        | 208.2846982 | 0.000912718 |
| 5095.16  | 5095.167286 | 1.4      | 14 | 3'-phosphate        | 70.74809863 | 0.000310023 |
| 5440.37  | 5440.752039 | 70.2     | 15 | 3'-phosphate        | 70.71147749 | 0.000309863 |
| 5745.56  | 5746.194232 | 110.4    | 16 | 3'-phosphate        | 79.74872857 | 0.000349464 |
| 6090.77  | no match    | no match | 17 | 3'-phosphate        | 0           | 0           |
| 6395.95  | no match    | no match | 18 | 3'-phosphate        | 0           | 0           |
| 6725.16  | no match    | no match | 19 | 3'-phosphate        | 0           | 0           |
| 7054.37  | no match    | no match | 20 | 3'-phosphate        | 0           | 0           |
| 7399.58  | no match    | no match | 21 | 3'-phosphate        | 0           | 0           |
| 7704.76  | no match    | no match | 22 | 3'-phosphate        | 0           | 0           |
| 8010.93  | no match    | no match | 23 | 3'-phosphate        | 0           | 0           |
| 8356.14  | no match    | no match | 24 | 3'-phosphate        | 0           | 0           |
| 8685.35  | no match    | no match | 25 | 3'-phosphate        | 0           | 0           |
| 8990.53  | no match    | no match | 26 | 3'-phosphate        | 0           | 0           |
| 9335.74  | no match    | no match | 27 | 3'-phosphate        | 0           | 0           |
| 9680.95  | no match    | no match | 28 | 3'-phosphate        | 0           | 0           |
| 9987.12  | no match    | no match | 29 | 3'-phosphate        | 0           | 0           |
| 10316.33 | no match    | no match | 30 | 3'-phosphate        | 0           | 0           |
| 10621.51 | no match    | no match | 31 | 3'-phosphate        | 0           | 0           |
| 10950.72 | no match    | no match | 32 | 3'-phosphate        | 0           | 0           |
| 11295.93 | no match    | no match | 33 | 3'-phosphate        | 0           | 0           |
| 11641.14 | no match    | no match | 34 | 3'-phosphate        | 0           | 0           |
| 11946.32 | no match    | no match | 35 | 3'-phosphate        | 0           | 0           |
| NA       | no match    | no match | 36 | 3'-phosphate        | 0           | 0           |
| 918.68   | no match    | no match | 1  | 3'-phosphoglycolate | 0           | 0           |
| 1224.85  | no match    | no match | 2  | 3'-phosphoglycolate | 0           | 0           |
| 1570.06  | no match    | no match | 3  | 3'-phosphoglycolate | 0           | 0           |
| 1915.27  | 1915.324956 | 28.7     | 4  | 3'-phosphoglycolate | 1536.114549 | 0.00673136  |
| 2221.44  | 2221.603802 | 73.7     | 5  | 3'-phosphoglycolate | 17404.45802 | 0.076267531 |
| 2526.62  | 2526.845626 | 89.3     | 6  | 3'-phosphoglycolate | 37150.11861 | 0.162794373 |
| 2832.79  | 2833.014314 | 79.2     | 7  | 3'-phosphoglycolate | 24951.63066 | 0.10933976  |
| 3178     | 3178.23388  | 73.6     | 8  | 3'-phosphoglycolate | 16011.80409 | 0.070164826 |
| 3523.21  | 3523.452255 | 68.8     | 9  | 3'-phosphoglycolate | 3075.000656 | 0.013474864 |
| 3868.42  | 3868.78875  | 95.3     | 10 | 3'-phosphoglycolate | 849.2317142 | 0.003721392 |



|          |             |          |    |                     |             |             |
|----------|-------------|----------|----|---------------------|-------------|-------------|
| 4173.6   | no match    | no match | 11 | 3'-phosphoglycolate | 0           | 0           |
| 4518.81  | 4519.042088 | 51.4     | 12 | 3'-phosphoglycolate | 192.569598  | 0.000843853 |
| 4823.99  | 4823.818951 | -35.5    | 13 | 3'-phosphoglycolate | 123.0122804 | 0.000539048 |
| 5153.2   | no match    | no match | 14 | 3'-phosphoglycolate | 0           | 0           |
| 5498.41  | 5498.711065 | 54.8     | 15 | 3'-phosphoglycolate | 103.2110446 | 0.000452278 |
| 5803.6   | no match    | no match | 16 | 3'-phosphoglycolate | 0           | 0           |
| 6148.81  | no match    | no match | 17 | 3'-phosphoglycolate | 0           | 0           |
| 6453.99  | no match    | no match | 18 | 3'-phosphoglycolate | 0           | 0           |
| 6783.2   | no match    | no match | 19 | 3'-phosphoglycolate | 0           | 0           |
| 7112.41  | 7112.169407 | -33.8    | 20 | 3'-phosphoglycolate | 88.79963368 | 0.000389126 |
| 7457.62  | no match    | no match | 21 | 3'-phosphoglycolate | 0           | 0           |
| 7762.8   | no match    | no match | 22 | 3'-phosphoglycolate | 0           | 0           |
| 8068.97  | no match    | no match | 23 | 3'-phosphoglycolate | 0           | 0           |
| 8414.18  | no match    | no match | 24 | 3'-phosphoglycolate | 0           | 0           |
| 8743.39  | no match    | no match | 25 | 3'-phosphoglycolate | 0           | 0           |
| 9048.57  | no match    | no match | 26 | 3'-phosphoglycolate | 0           | 0           |
| 9393.78  | no match    | no match | 27 | 3'-phosphoglycolate | 0           | 0           |
| 9738.99  | no match    | no match | 28 | 3'-phosphoglycolate | 0           | 0           |
| 10045.16 | no match    | no match | 29 | 3'-phosphoglycolate | 0           | 0           |
| 10374.37 | no match    | no match | 30 | 3'-phosphoglycolate | 0           | 0           |
| 10679.55 | no match    | no match | 31 | 3'-phosphoglycolate | 0           | 0           |
| 11008.76 | no match    | no match | 32 | 3'-phosphoglycolate | 0           | 0           |
| 11353.97 | no match    | no match | 33 | 3'-phosphoglycolate | 0           | 0           |
| 11699.18 | no match    | no match | 34 | 3'-phosphoglycolate | 0           | 0           |
| 12004.36 | no match    | no match | 35 | 3'-phosphoglycolate | 0           | 0           |
| NA       | no match    | no match | 36 | 3'-phosphoglycolate | 0           | 0           |
| NA       | no match    | no match | 1  | 5'-OH               | 0           | 0           |
| 11327.86 | no match    | no match | 2  | 5'-OH               | 0           | 0           |
| 11021.7  | no match    | no match | 3  | 5'-OH               | 0           | 0           |
| 10676.49 | no match    | no match | 4  | 5'-OH               | 0           | 0           |
| 10331.28 | no match    | no match | 5  | 5'-OH               | 0           | 0           |
| 10025.11 | no match    | no match | 6  | 5'-OH               | 0           | 0           |
| 9719.93  | no match    | no match | 7  | 5'-OH               | 0           | 0           |
| 9413.76  | no match    | no match | 8  | 5'-OH               | 0           | 0           |
| 9068.55  | no match    | no match | 9  | 5'-OH               | 0           | 0           |
| 8723.34  | no match    | no match | 10 | 5'-OH               | 0           | 0           |
| 8378.13  | no match    | no match | 11 | 5'-OH               | 0           | 0           |
| 8072.95  | no match    | no match | 12 | 5'-OH               | 0           | 0           |
| 7727.74  | no match    | no match | 13 | 5'-OH               | 0           | 0           |
| 7422.56  | 7421.974566 | -78.9    | 14 | 5'-OH               | 78.30586776 | 0.000343142 |
| 7093.35  | no match    | no match | 15 | 5'-OH               | 0           | 0           |

|          |             |          |    |              |             |             |
|----------|-------------|----------|----|--------------|-------------|-------------|
| 6748.14  | no match    | no match | 16 | 5'-OH        | 0           | 0           |
| 6442.96  | no match    | no match | 17 | 5'-OH        | 0           | 0           |
| 6097.75  | no match    | no match | 18 | 5'-OH        | 0           | 0           |
| 5792.57  | 5792.207389 | -62.6    | 19 | 5'-OH        | 567.2532745 | 0.002485743 |
| 5463.36  | 5462.385422 | -178.4   | 20 | 5'-OH        | 133.4589669 | 0.000584826 |
| 5134.15  | 5133.380899 | -149.8   | 21 | 5'-OH        | 148.517815  | 0.000650815 |
| 4788.94  | 4788.004116 | -195.4   | 22 | 5'-OH        | 381.1841812 | 0.001670375 |
| 4483.76  | 4483.037567 | -161.1   | 23 | 5'-OH        | 483.8956656 | 0.002120464 |
| 4177.59  | no match    | no match | 24 | 5'-OH        | 0           | 0           |
| 3832.38  | 3831.838834 | -141.2   | 25 | 5'-OH        | 1100.619085 | 0.004822988 |
| 3503.17  | 3502.734975 | -124.2   | 26 | 5'-OH        | 914.7354935 | 0.004008434 |
| 3197.99  | 3197.677233 | -97.8    | 27 | 5'-OH        | 6642.141128 | 0.029106319 |
| 2852.78  | 2852.715205 | -22.7    | 28 | 5'-OH        | 3244.762079 | 0.01421877  |
| 2507.57  | no match    | no match | 29 | 5'-OH        | 0           | 0           |
| 2201.4   | 2201.024257 | -170.7   | 30 | 5'-OH        | 1964.902418 | 0.008610337 |
| 1872.19  | no match    | no match | 31 | 5'-OH        | 0           | 0           |
| 1567.01  | no match    | no match | 32 | 5'-OH        | 0           | 0           |
| 1237.8   | no match    | no match | 33 | 5'-OH        | 0           | 0           |
| 892.59   | no match    | no match | 34 | 5'-OH        | 0           | 0           |
| 547.38   | no match    | no match | 35 | 5'-OH        | 0           | 0           |
| 242.2    | no match    | no match | 36 | 5'-OH        | 0           | 0           |
| NA       | no match    | no match | 1  | 5'-phosphate | 0           | 0           |
| 11407.84 | no match    | no match | 2  | 5'-phosphate | 0           | 0           |
| 11101.68 | no match    | no match | 3  | 5'-phosphate | 0           | 0           |
| 10756.47 | no match    | no match | 4  | 5'-phosphate | 0           | 0           |
| 10411.26 | no match    | no match | 5  | 5'-phosphate | 0           | 0           |
| 10105.09 | no match    | no match | 6  | 5'-phosphate | 0           | 0           |
| 9799.91  | no match    | no match | 7  | 5'-phosphate | 0           | 0           |
| 9493.74  | no match    | no match | 8  | 5'-phosphate | 0           | 0           |
| 9148.53  | no match    | no match | 9  | 5'-phosphate | 0           | 0           |
| 8803.32  | no match    | no match | 10 | 5'-phosphate | 0           | 0           |
| 8458.11  | no match    | no match | 11 | 5'-phosphate | 0           | 0           |
| 8152.93  | no match    | no match | 12 | 5'-phosphate | 0           | 0           |
| 7807.72  | no match    | no match | 13 | 5'-phosphate | 0           | 0           |
| 7502.54  | no match    | no match | 14 | 5'-phosphate | 0           | 0           |
| 7173.33  | no match    | no match | 15 | 5'-phosphate | 0           | 0           |
| 6828.12  | no match    | no match | 16 | 5'-phosphate | 0           | 0           |
| 6522.94  | 6523.053447 | 17.4     | 17 | 5'-phosphate | 89.52517336 | 0.000392305 |
| 6177.73  | 6177.340573 | -63.0    | 18 | 5'-phosphate | 112.999793  | 0.000495173 |
| 5872.55  | no match    | no match | 19 | 5'-phosphate | 0           | 0           |
| 5543.34  | 5542.905083 | -78.5    | 20 | 5'-phosphate | 157.6384834 | 0.000690783 |

|         |             |          |         |              |             |             |
|---------|-------------|----------|---------|--------------|-------------|-------------|
| 5214.13 | 5213.717271 | -79.2    | 21      | 5'-phosphate | 808.7536572 | 0.003544014 |
| 4868.92 | 4868.550131 | -76.0    | 22      | 5'-phosphate | 6036.56855  | 0.026452658 |
| 4563.74 | 4563.388356 | -77.1    | 23      | 5'-phosphate | 8501.901754 | 0.037255918 |
| 4257.57 | 4257.220846 | -82.0    | 24      | 5'-phosphate | 3625.111927 | 0.01588549  |
| 3912.36 | 3912.08979  | -69.1    | 25      | 5'-phosphate | 5413.856879 | 0.023723893 |
| 3583.15 | 3582.747586 | -112.3   | 26      | 5'-phosphate | 2047.538426 | 0.008972454 |
| 3277.97 | 3277.532532 | -133.5   | 27      | 5'-phosphate | 1484.279898 | 0.006504217 |
| 2932.76 | 2932.38258  | -128.7   | 28      | 5'-phosphate | 3837.8812   | 0.016817859 |
| 2587.55 | 2587.712148 | 62.7     | 29      | 5'-phosphate | 3021.656977 | 0.013241109 |
| 2281.38 | no match    | no match | 30      | 5'-phosphate | 0           | 0           |
| 1952.17 | 1952.263488 | 47.9     | 31      | 5'-phosphate | 152.0288931 | 0.000666201 |
| 1646.99 | 1647.140761 | 91.5     | 32      | 5'-phosphate | 43.8794809  | 0.000192283 |
| 1317.78 | no match    | no match | 33      | 5'-phosphate | 0           | 0           |
| 972.57  | no match    | no match | 34      | 5'-phosphate | 0           | 0           |
| 627.36  | no match    | no match | 35      | 5'-phosphate | 0           | 0           |
| 322.18  | no match    | no match | 36      | 5'-phosphate | 0           | 0           |
| unknown | 1000.192991 | unknown  | unknown | unknown      | 90.71652509 |             |
| unknown | 1024.669562 | unknown  | unknown | unknown      | -29.6925884 |             |
| unknown | 1039.43436  | unknown  | unknown | unknown      | 24.14009998 |             |
| unknown | 1053.934414 | unknown  | unknown | unknown      | 34.13122436 |             |
| unknown | 1069.882167 | unknown  | unknown | unknown      | 489.3513209 |             |
| unknown | 1086.250217 | unknown  | unknown | unknown      | 3813.317469 |             |
| unknown | 1101.659453 | unknown  | unknown | unknown      | 120.7820136 |             |
| unknown | 1108.904736 | unknown  | unknown | unknown      | 93.921094   |             |
| unknown | 1124.00714  | unknown  | unknown | unknown      | 71.55375436 |             |
| unknown | 1133.790497 | unknown  | unknown | unknown      | 26.65421214 |             |
| unknown | 1136.358489 | unknown  | unknown | unknown      | 23.63199722 |             |
| unknown | 1165.854354 | unknown  | unknown | unknown      | -6.29728988 |             |
| unknown | 1179.838319 | unknown  | unknown | unknown      | 79.04650475 |             |
| unknown | 1233.510332 | unknown  | unknown | unknown      | 37.27961491 |             |
| unknown | 1247.174724 | unknown  | unknown | unknown      | 196.6719913 |             |
| unknown | 1263.14571  | unknown  | unknown | unknown      | 583.931974  |             |
| unknown | 1317.359707 | unknown  | unknown | unknown      | 21.640908   |             |
| unknown | 1355.560024 | unknown  | unknown | unknown      | 20.71653472 |             |
| unknown | 1370.493209 | unknown  | unknown | unknown      | 32.27658793 |             |
| unknown | 1386.483356 | unknown  | unknown | unknown      | 164.6063434 |             |
| unknown | 1402.587372 | unknown  | unknown | unknown      | 1547.447956 |             |
| unknown | 1416.490318 | unknown  | unknown | unknown      | 70.02387475 |             |
| unknown | 1424.723702 | unknown  | unknown | unknown      | 35.78683123 |             |
| unknown | 1440.612758 | unknown  | unknown | unknown      | 30.77960854 |             |
| unknown | 1511.685729 | unknown  | unknown | unknown      | 29.50911445 |             |

|         |             |         |         |         |             |  |
|---------|-------------|---------|---------|---------|-------------|--|
| unknown | 1566.610509 | unknown | unknown | unknown | 465.2994219 |  |
| unknown | 1579.493361 | unknown | unknown | unknown | 180.759015  |  |
| unknown | 1606.340372 | unknown | unknown | unknown | 36.17600065 |  |
| unknown | 1623.034516 | unknown | unknown | unknown | 20.46627907 |  |
| unknown | 1718.726167 | unknown | unknown | unknown | 348.709257  |  |
| unknown | 1758.887165 | unknown | unknown | unknown | 43.82186144 |  |
| unknown | 1871.590065 | unknown | unknown | unknown | 9.446150706 |  |
| unknown | 1929.932864 | unknown | unknown | unknown | 28.28051184 |  |
| unknown | 1968.584025 | unknown | unknown | unknown | 31.23915989 |  |
| unknown | 1971.961522 | unknown | unknown | unknown | 63.54064087 |  |
| unknown | 1982.187724 | unknown | unknown | unknown | 40.7167382  |  |
| unknown | 1987.429082 | unknown | unknown | unknown | 44.74467949 |  |
| unknown | 1991.243496 | unknown | unknown | unknown | 37.79707248 |  |
| unknown | 1996.593954 | unknown | unknown | unknown | 45.41801614 |  |
| unknown | 2001.890852 | unknown | unknown | unknown | 39.31007596 |  |
| unknown | 2009.386902 | unknown | unknown | unknown | 76.91657201 |  |
| unknown | 2014.916877 | unknown | unknown | unknown | 30.43567252 |  |
| unknown | 2023.275601 | unknown | unknown | unknown | 51.07662072 |  |
| unknown | 2029.681143 | unknown | unknown | unknown | 125.7186618 |  |
| unknown | 2178.179229 | unknown | unknown | unknown | -327.68893  |  |
| unknown | 2236.672981 | unknown | unknown | unknown | 137.0835501 |  |
| unknown | 2243.180393 | unknown | unknown | unknown | 316.1129164 |  |
| unknown | 2258.80587  | unknown | unknown | unknown | 29.97590942 |  |
| unknown | 2280.676299 | unknown | unknown | unknown | 440.2159526 |  |
| unknown | 2298.186916 | unknown | unknown | unknown | 162.9054286 |  |
| unknown | 2304.742186 | unknown | unknown | unknown | 68.60534076 |  |
| unknown | 2317.095466 | unknown | unknown | unknown | 377.2914437 |  |
| unknown | 2338.354426 | unknown | unknown | unknown | 538.4354975 |  |
| unknown | 2350.856313 | unknown | unknown | unknown | 388.5381762 |  |
| unknown | 2370.760453 | unknown | unknown | unknown | 87.17885192 |  |
| unknown | 2541.373176 | unknown | unknown | unknown | -1310.58496 |  |
| unknown | 2548.483483 | unknown | unknown | unknown | -1208.94526 |  |
| unknown | 2563.630388 | unknown | unknown | unknown | -881.789527 |  |
| unknown | 2577.408212 | unknown | unknown | unknown | 8608.637868 |  |
| unknown | 2607.955333 | unknown | unknown | unknown | 6106.949511 |  |
| unknown | 2617.309656 | unknown | unknown | unknown | 43048.49137 |  |
| unknown | 2629.127298 | unknown | unknown | unknown | 15558.24052 |  |
| unknown | 2644.314014 | unknown | unknown | unknown | 8976.873126 |  |
| unknown | 2688.374481 | unknown | unknown | unknown | 360.3229347 |  |
| unknown | 2699.338356 | unknown | unknown | unknown | 20.59771314 |  |
| unknown | 2707.67266  | unknown | unknown | unknown | 22.09327158 |  |

|         |             |         |         |         |             |  |
|---------|-------------|---------|---------|---------|-------------|--|
| unknown | 2757.444581 | unknown | unknown | unknown | 1431.897555 |  |
| unknown | 2789.557577 | unknown | unknown | unknown | 1268.96941  |  |
| unknown | 2799.509302 | unknown | unknown | unknown | 3613.605499 |  |
| unknown | 2811.455219 | unknown | unknown | unknown | -1279.63467 |  |
| unknown | 2870.23302  | unknown | unknown | unknown | -1740.20751 |  |
| unknown | 2890.813359 | unknown | unknown | unknown | 1899.615445 |  |
| unknown | 2904.812734 | unknown | unknown | unknown | -31.5745912 |  |
| unknown | 2912.761248 | unknown | unknown | unknown | -597.395143 |  |
| unknown | 3022.372448 | unknown | unknown | unknown | -232.589255 |  |
| unknown | 3041.993977 | unknown | unknown | unknown | 200.3018082 |  |
| unknown | 3054.290182 | unknown | unknown | unknown | 400.4101123 |  |
| unknown | 3065.954174 | unknown | unknown | unknown | 468.9866774 |  |
| unknown | 3078.020315 | unknown | unknown | unknown | 944.2477428 |  |
| unknown | 3135.107258 | unknown | unknown | unknown | 1523.958415 |  |
| unknown | 3158.122425 | unknown | unknown | unknown | -143.32206  |  |
| unknown | 3214.252631 | unknown | unknown | unknown | 984.7318833 |  |
| unknown | 3293.678138 | unknown | unknown | unknown | -327.102533 |  |
| unknown | 3369.147336 | unknown | unknown | unknown | 213.6951354 |  |
| unknown | 3377.517692 | unknown | unknown | unknown | 86.68170643 |  |
| unknown | 3384.131534 | unknown | unknown | unknown | 158.4937202 |  |
| unknown | 3400.049679 | unknown | unknown | unknown | 173.8475433 |  |
| unknown | 3480.656129 | unknown | unknown | unknown | 176.264323  |  |
| unknown | 3538.484178 | unknown | unknown | unknown | -2.28260888 |  |
| unknown | 3560.688097 | unknown | unknown | unknown | -223.531924 |  |
| unknown | 3602.977367 | unknown | unknown | unknown | 397.6536785 |  |
| unknown | 3619.448723 | unknown | unknown | unknown | -11.6441085 |  |
| unknown | 3686.06181  | unknown | unknown | unknown | 23.57329675 |  |
| unknown | 3713.649309 | unknown | unknown | unknown | 78.93446147 |  |
| unknown | 3745.962802 | unknown | unknown | unknown | 45.04616355 |  |
| unknown | 3846.299735 | unknown | unknown | unknown | 96.52177333 |  |
| unknown | 3883.556857 | unknown | unknown | unknown | 123.4229807 |  |
| unknown | 3930.050686 | unknown | unknown | unknown | 351.2166462 |  |
| unknown | 3948.966547 | unknown | unknown | unknown | 110.5668399 |  |
| unknown | 4176.241589 | unknown | unknown | unknown | 1288.091898 |  |
| unknown | 4191.091806 | unknown | unknown | unknown | 267.6094676 |  |
| unknown | 4213.968859 | unknown | unknown | unknown | 51.23232897 |  |
| unknown | 4273.902148 | unknown | unknown | unknown | 485.8861199 |  |
| unknown | 4294.44941  | unknown | unknown | unknown | 97.38480426 |  |
| unknown | 4441.684106 | unknown | unknown | unknown | 172.5652913 |  |
| unknown | 4497.413701 | unknown | unknown | unknown | 374.9069586 |  |
| unknown | 4580.925364 | unknown | unknown | unknown | 554.0391234 |  |

|         |             |         |         |         |             |  |
|---------|-------------|---------|---------|---------|-------------|--|
| unknown | 4600.400185 | unknown | unknown | unknown | 224.535698  |  |
| unknown | 4618.571637 | unknown | unknown | unknown | 54.43201194 |  |
| unknown | 4802.663955 | unknown | unknown | unknown | 483.4152525 |  |
| unknown | 4887.738593 | unknown | unknown | unknown | 345.3399293 |  |
| unknown | 4906.752139 | unknown | unknown | unknown | 140.4235055 |  |
| unknown | 4940.917293 | unknown | unknown | unknown | 166.8740241 |  |
| unknown | 5152.153598 | unknown | unknown | unknown | 255.6915291 |  |
| unknown | 5169.05932  | unknown | unknown | unknown | 77.27809114 |  |
| unknown | 5231.27596  | unknown | unknown | unknown | 305.7992614 |  |
| unknown | 5248.342185 | unknown | unknown | unknown | 70.80900843 |  |
| unknown | 5559.046816 | unknown | unknown | unknown | 102.5444777 |  |
| unknown | 5805.801307 | unknown | unknown | unknown | 280.4613142 |  |
| unknown | 6095.10959  | unknown | unknown | unknown | 250.5558863 |  |
| unknown | 6110.636695 | unknown | unknown | unknown | 108.4119919 |  |
| unknown | 12187.52966 | unknown | unknown | unknown | 1194.220106 |  |
| unknown | 12204.99702 | unknown | unknown | unknown | 722.1666675 |  |
| unknown | 12222.24389 | unknown | unknown | unknown | 316.2455707 |  |

**Table SM4.** Example output from MassDaddy for one reaction (with subsequent calculation of peak area fractions), showing matching of observed MS peaks with predicted peaks for FI-RRE RNA cleavage products, which contained the listed nascent overhangs at the listed nucleotide positions (36 nucleotides in the FI-RRE sequence). Peak assignment was performed by comparison of observed  $m/z$  with theoretical  $m/z$ , with a mass matching tolerance of 200 ppm (mass matching errors are shown for each matched peak). The peak assignment information shown here are for the 120 min time point from the Fe-EDTA-Rev/RRE RNA/coreactants reaction.

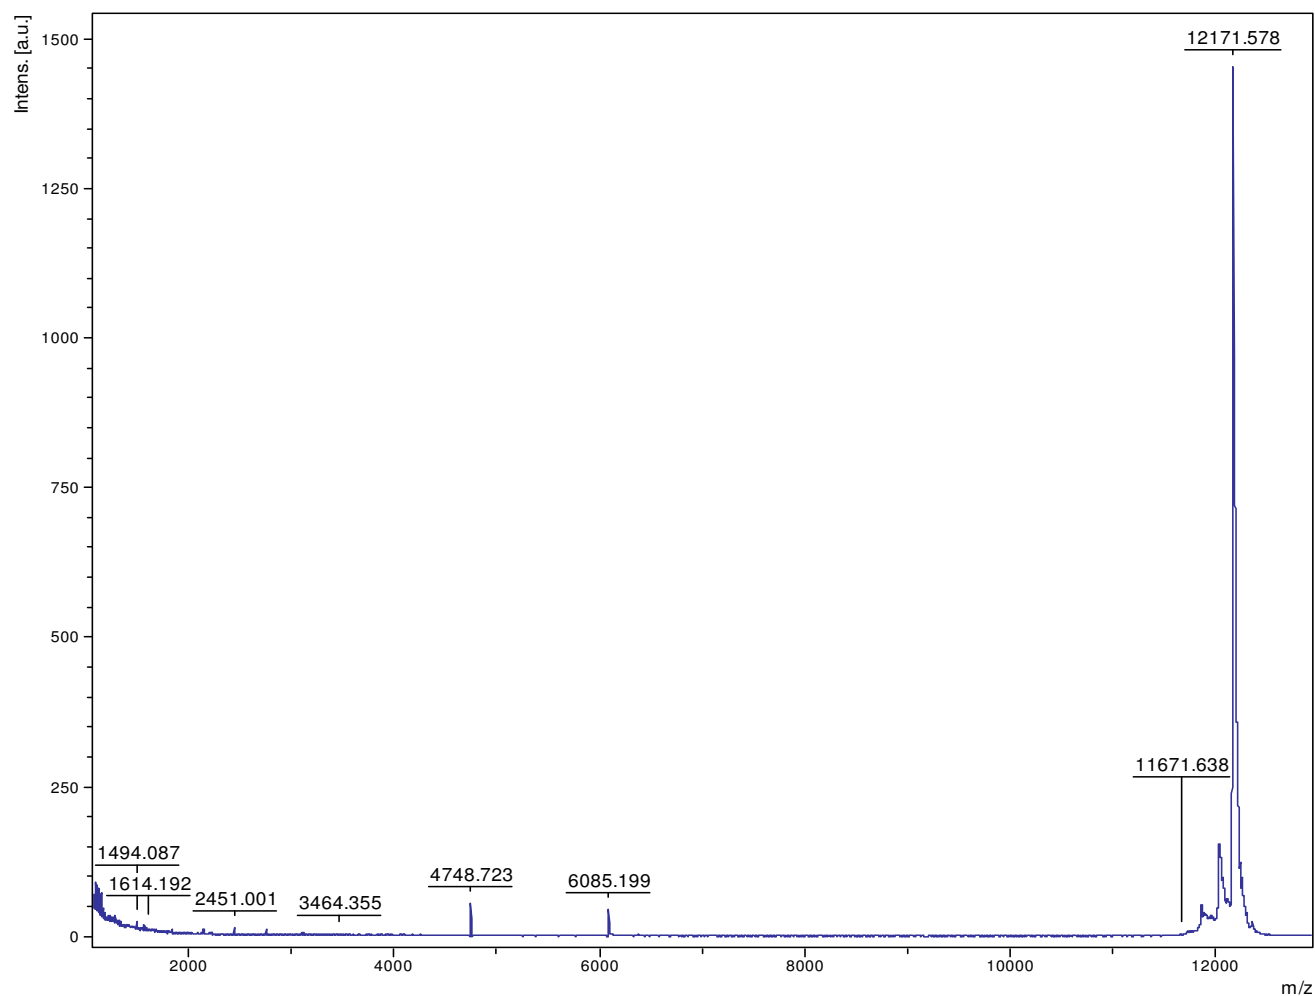

**Figure SM1.** MALDI-TOF mass spectrum for desalted mixture of FI-RRE RNA, 1 mM H<sub>2</sub>O<sub>2</sub>, and 1 mM ascorbate, but lacking catalyst, after 1 h incubation at 37 °C. The expected mass for the [FI-RRE - 1H]<sup>1-</sup> anion is 12171.5 amu. Other peaks with lower m/z are regularly observed fragmentation and/or endonucleolysis products containing 2',3'-cyclic(PO<sub>4</sub>) and 5'-OH overhangs (c-fragments and y-fragments, respectively). The peak at 6085.2 amu is the doubly charged [FI-RRE - 2H]<sup>2-</sup> anion. The triply-charged and other multiply-charged anions were not observed. The mass spectrum for FI-RRE in the absence of coreactants was similar to the spectrum shown here. No oxidative strand scission was observed in the absence of metal complex but in the presence of redox coreactants.

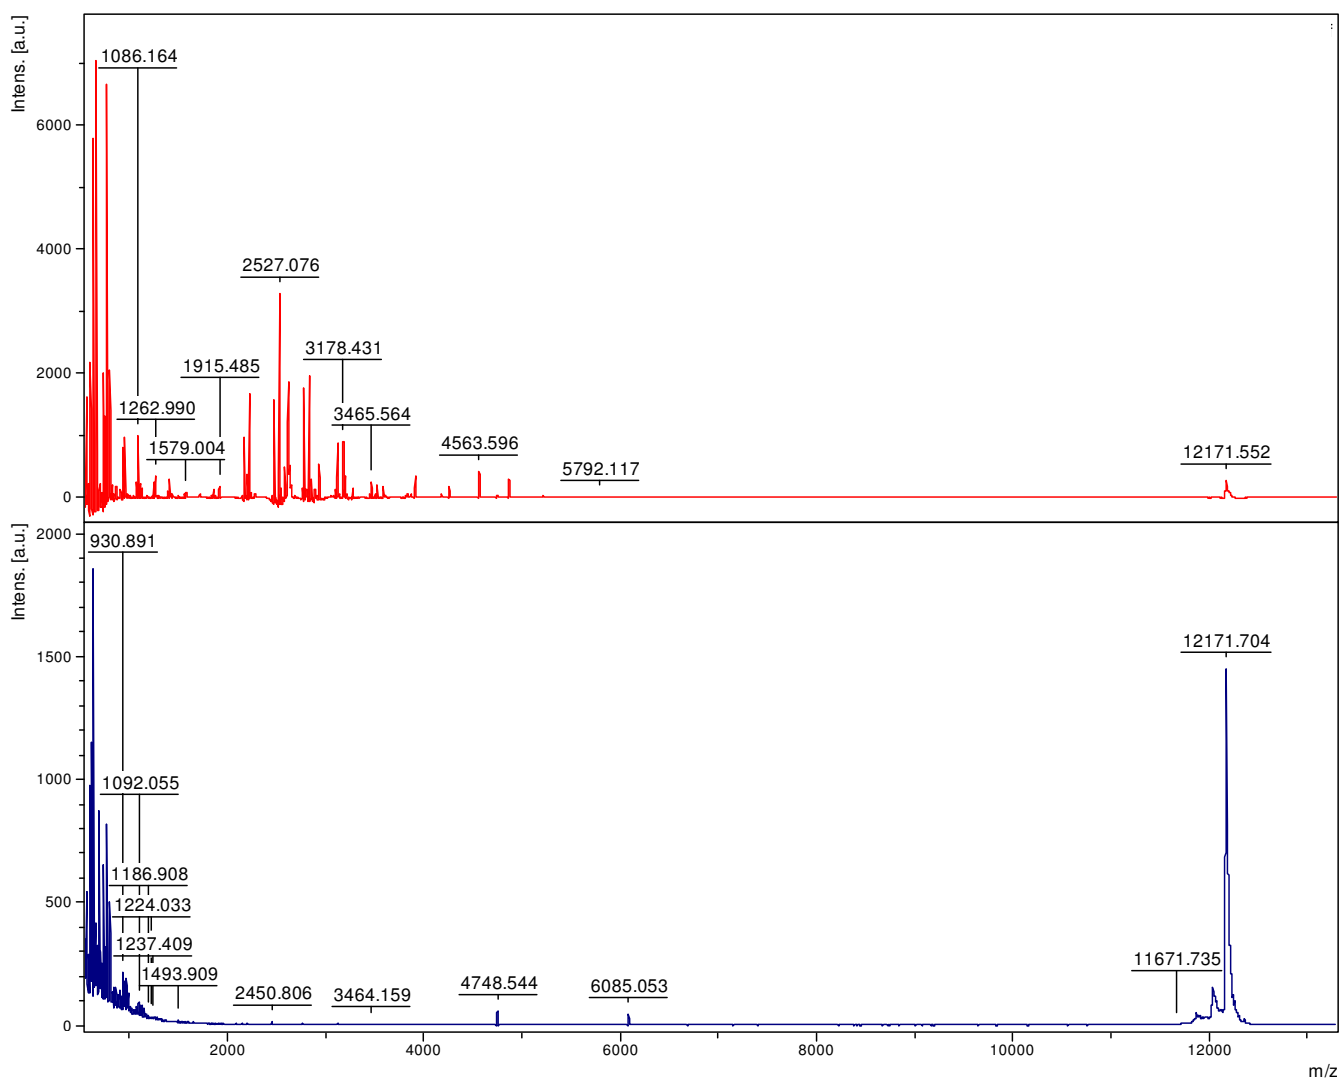

**Figure SM2.** Comparison of mass spectra for desalted mixtures of FI-RRE RNA incubated for 1 h with coreactants ( $H_2O_2$  and ascorbate) and with Fe-EDTA-Rev (red) vs without added catalyst (blue).



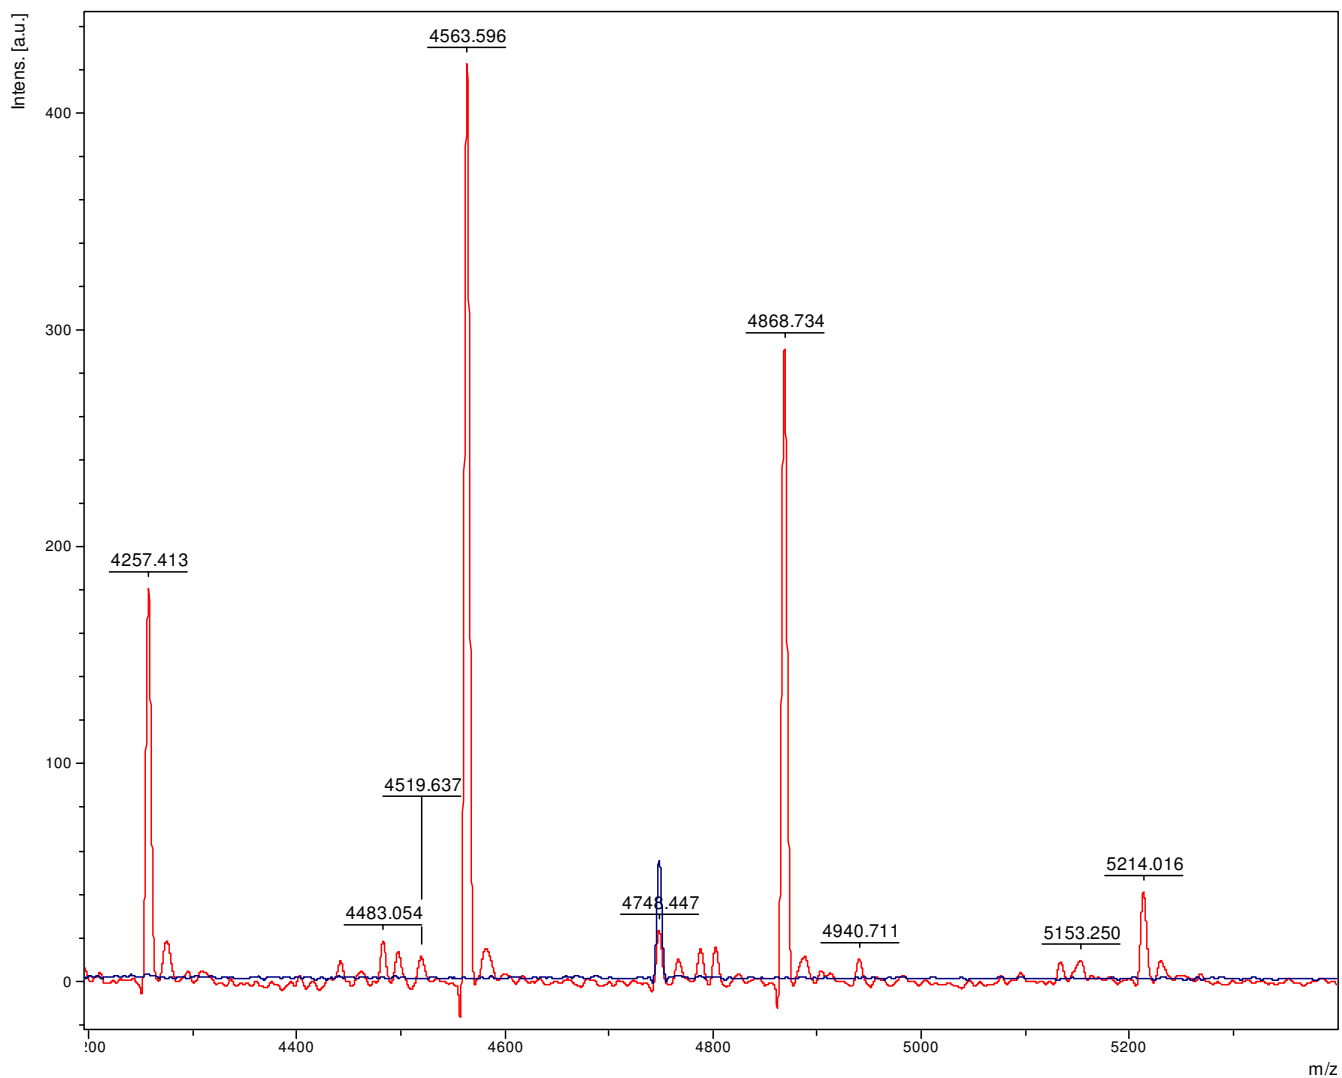

**Figure SM2 (cont'd).** Focus on the region 4200 to 5400 amu, showing that certain overhangs resulted only from catalyst-mediated cleavage, while other fragments that resulted from 2'-OH-mediated endonucleolytic pathways were observed even for the control reaction lacking catalyst. Note the blue peak at ~ 4748 amu, corresponding to the 5'-Fl-UUGGUCUGGGCGC-2',3'-c(PO<sub>4</sub>) fragment.

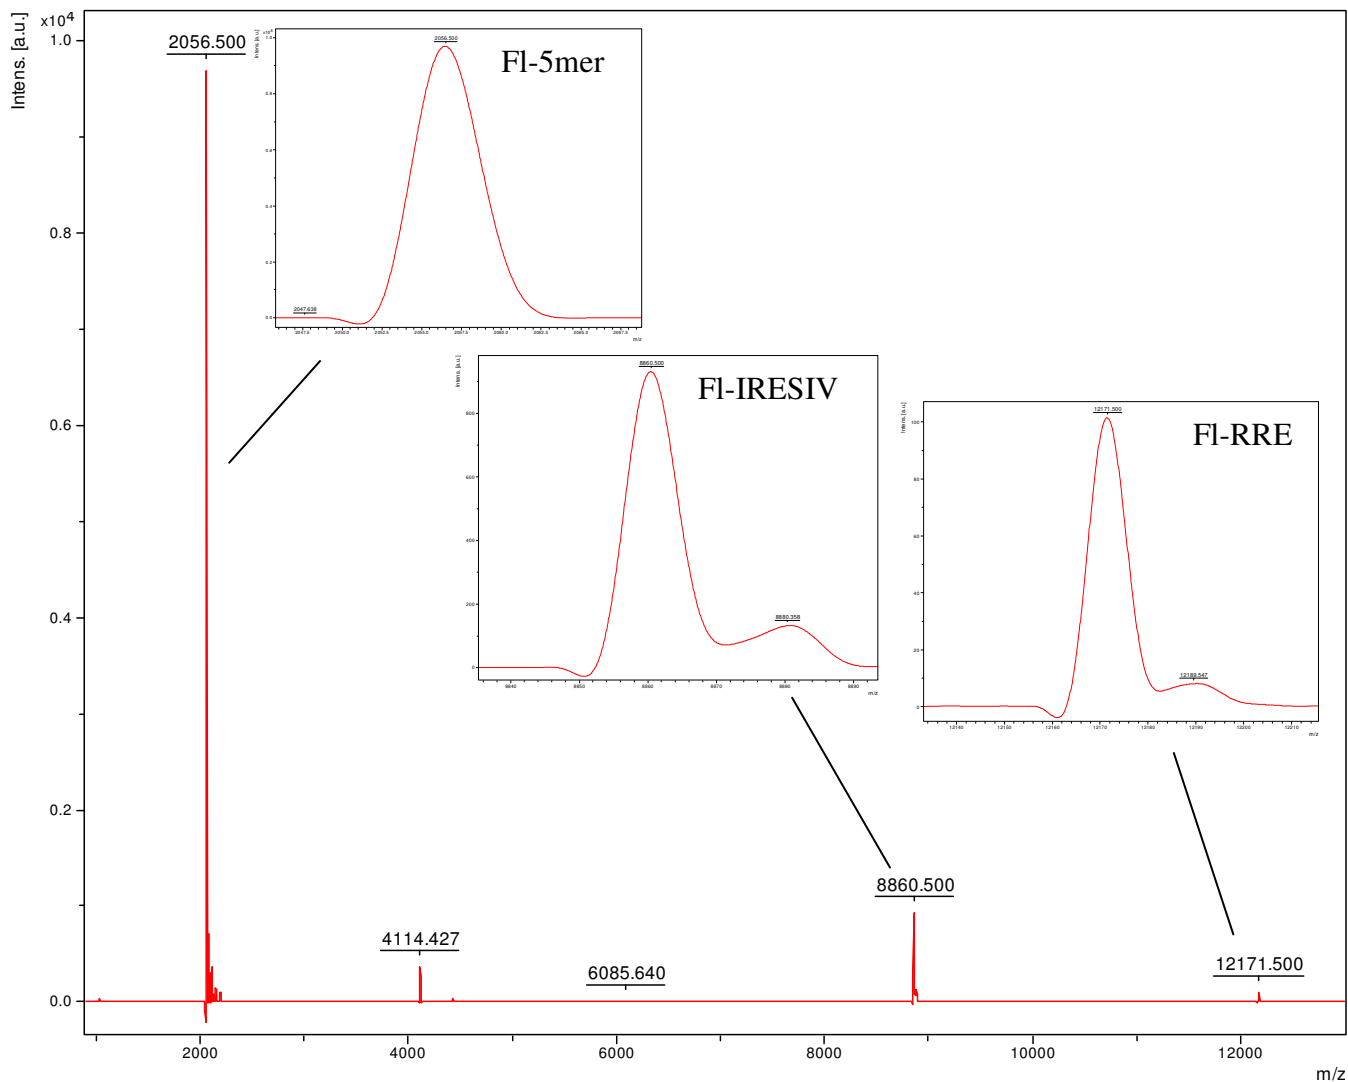

**Figure SM3.** Mixture of three RNA species used for mass calibration prior to each analysis:  $[\text{FI-RRE} - 1\text{H}]^{-1}$  (12171.5 amu),  $[\text{FI-IRESIV} - 1\text{H}]^{-1}$  (8850.5 amu), and  $[\text{FI-5-mer} - 1\text{H}]^{-1}$  (2056.5 amu). The mixture originally contained 10  $\mu\text{M}$  of each RNA species in a buffer consisting of 20 mM HEPES, 100 mM NaCl, pH 7.4. This mixture was desalted by  $\text{C}_{18}$  ZipTip purification and analyzed by MALDI TOF MS (negative ion mode), as described in the manuscript. The total concentration of RNA bases in the original mixture was  $\sim 670 \mu\text{M}$ .

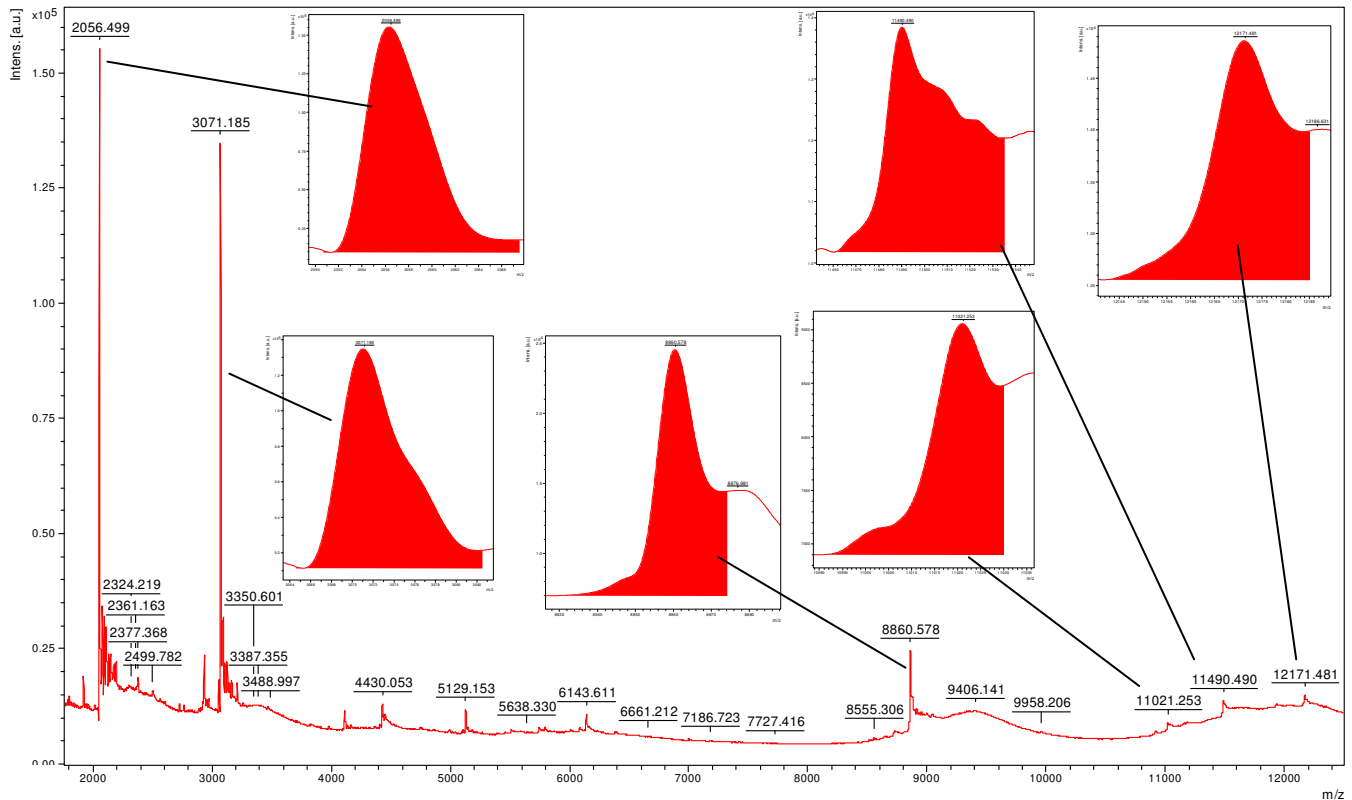

| RNA Species                          | Observed m/z (amu) | Observed Peak Area |
|--------------------------------------|--------------------|--------------------|
| [FI-5mer - 1H] <sup>1-</sup>         | 2056.50            | 1094714            |
| [Dylight547-8mer - 1H] <sup>1-</sup> | 3071.19            | 1119419            |
| [FI-IRESSLIV - 1H] <sup>1-</sup>     | 8860.58            | 604009             |
| [unlabelled RRE-1H] <sup>1-</sup>    | 11021.25           | 319214             |
| [FI-SLIIB-1H] <sup>1-</sup>          | 11490.49           | 912910             |
| [FI-RRE - 1H] <sup>1-</sup>          | 12171.48           | 585082             |

**Figure SM4. Mass bias.** A mixture of six different RNA species with a range of masses (shown above), each originally present at 2.5  $\mu\text{M}$  in 20 mM HEPES, 100 mM NaCl, pH 7.4, was desalted by C<sub>18</sub> ZipTip purification and analyzed by MALDI-TOF MS, as described in the manuscript. Detection of RNA fragments was biased toward fragments with smaller mass, as shown in the table above, and this skewing of the apparent abundances in favor of species with lower mass appeared to result from the desalting and/or MALDI TOF processes. Note that the peak width increases for RNA with higher m/z (peak area is more accurate than peak height for quantification). The total concentration of RNA bases in the original mixture was  $\sim 360 \mu\text{M}$ , the same as used in experiments involving cleavage of FI-RRE RNA (10  $\mu\text{M}$  of the 36mer).

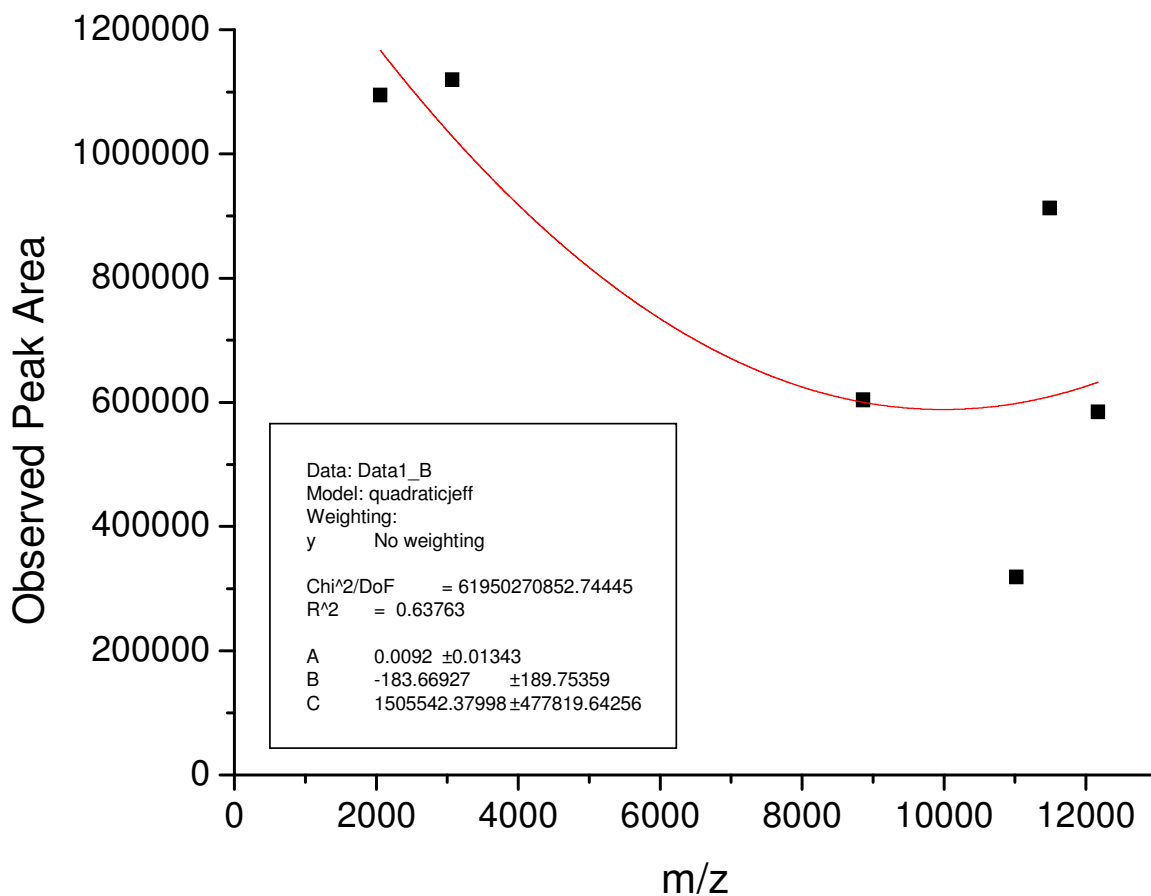

**Figure SM5.** Mass bias. For the mass spectrum shown in Figure SM4, which includes a mixture of six different RNA species with a range of masses, the observed peak areas were plotted vs the  $m/z$ . The plot was fit to a parabola, the fitted parameters of which would allow for external calibrations of the peak areas in mass spectra if errors on the fitted parameters were sufficiently low, prior to conversion of peak areas to peak area fractions. External calibrations of peak areas were not performed for any of the data shown in the manuscript or the Supporting Information.

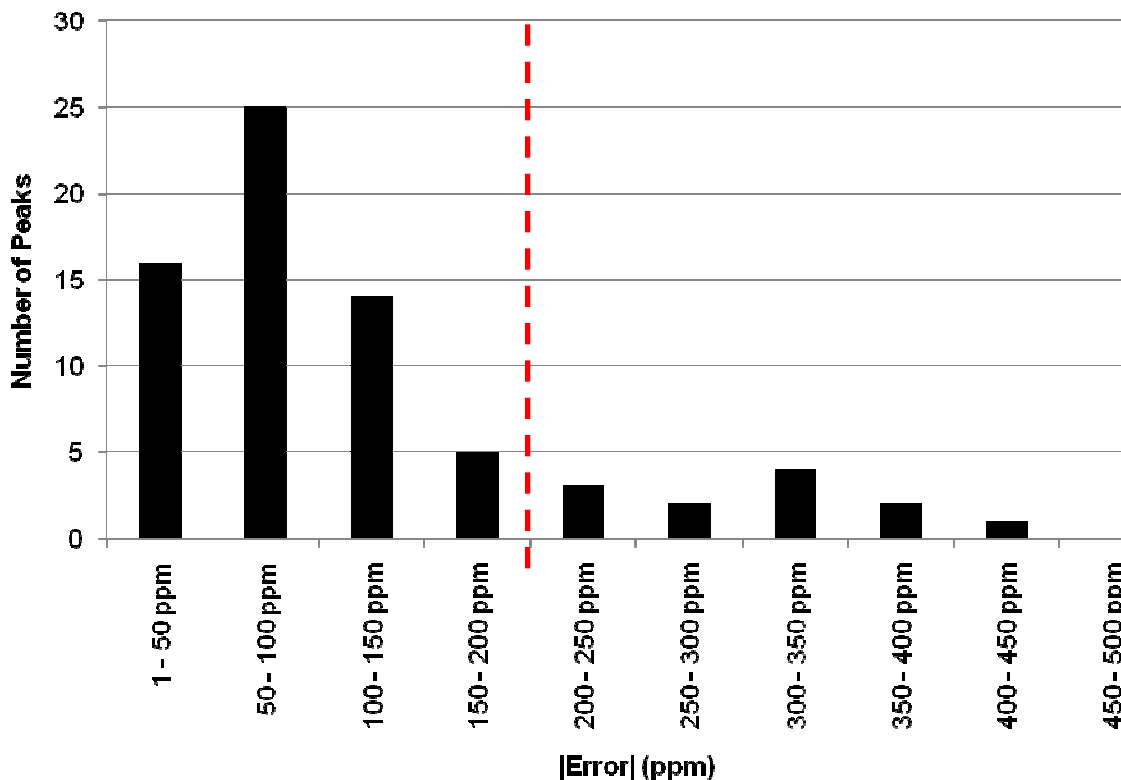

**Figure SM6.** Histogram showing the distribution of mass-matching errors for all assigned peaks for one reaction. Although a mass-matching tolerance of 200 ppm was used for all other data (shown by the red dashed line), the data shown in this figure were generated by use of a mass-matching tolerance of 500 ppm, in order to show the distribution of errors. When a mass-matching tolerance of 200 ppm was used, the root-mean-square (RMS) mass-matching error for the reaction was 113 ppm. The data and RMS calculation shown here are from the 120 min time point from the Fe-EDTA-Rev/RRE RNA/coreactants reaction.

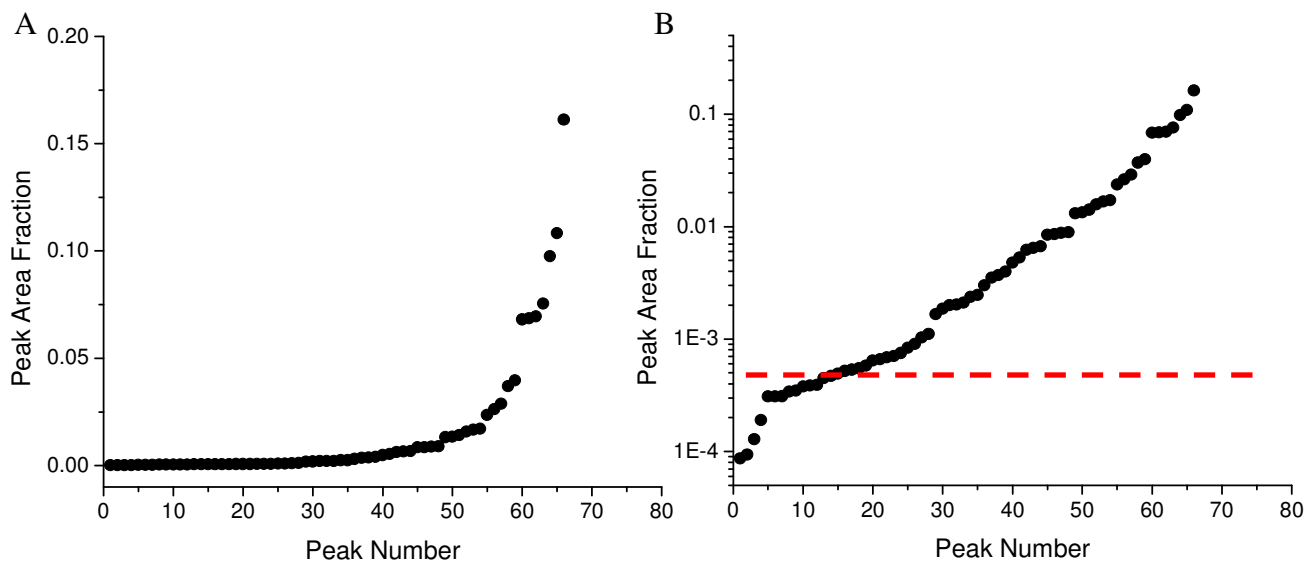

**Figure SM7.** In order for a MS peak to be considered ‘real’, the peak area fraction was required to be  $>0.0005$ , following assignment of peaks. Additionally, the  $m/z$  for an observed peak was required to be within a matching threshold (200 ppm) relative to the  $m/z$  for the predicted peak (shown elsewhere). The peaks shown here resulted from the 120 min timepoint from the Fe-EDTA-Rev/RRE RNA/coreactants reaction: (A) linear plot and (B) semi-log plot of the same data. The peak area fraction threshold of 0.0005 is represented by the red line.

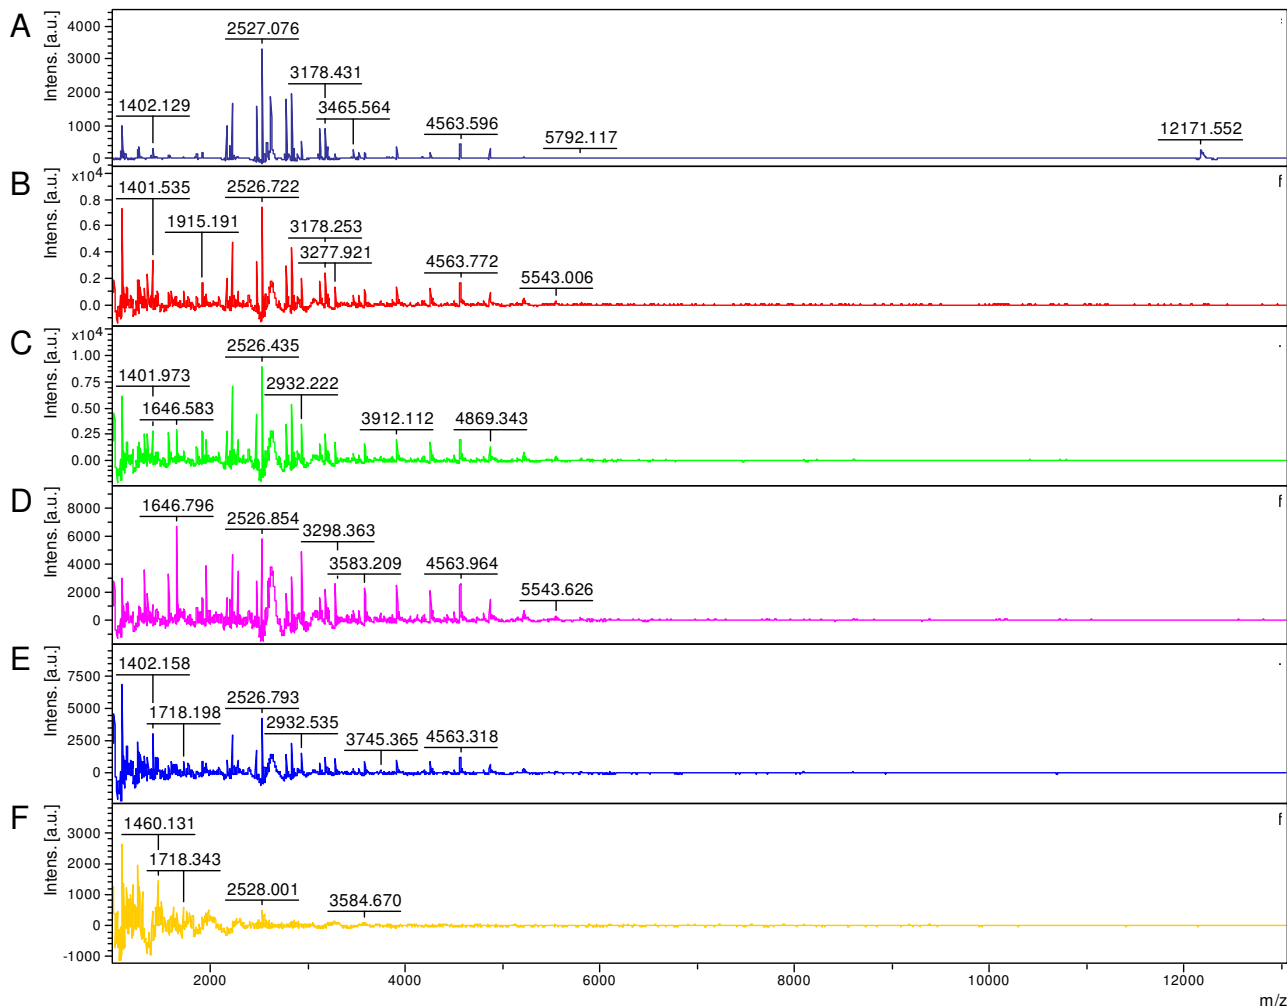

**Figure SM8.** Comparison of sample washing procedures for the C<sub>18</sub> ZipTip desalting protocol, following loading of the RNA samples onto the ZipTip, but prior to elution of RNA. Samples contained a reaction mixture following a 1h incubation of 10  $\mu$ M FI-RRE RNA with 10  $\mu$ M Fe-EDTA-Rev and 1 mM H<sub>2</sub>O<sub>2</sub> + ascorbate. Samples were washed as follows: (A) with three 10  $\mu$ L volumes of 2M triethylamine acetate (TEAA) buffer, then three 10  $\mu$ L volumes of H<sub>2</sub>O; (B) with two 10  $\mu$ L volumes of 2M TEAA buffer, then three 10  $\mu$ L volumes of H<sub>2</sub>O; (C) with one 10  $\mu$ L volume of 2M TEAA buffer, then three 10  $\mu$ L volumes of H<sub>2</sub>O; (D) only three 10  $\mu$ L volumes of H<sub>2</sub>O; (E) with one 10  $\mu$ L volume of 2M TEAA buffer, then one 10  $\mu$ L volume of H<sub>2</sub>O; (F) with three 10  $\mu$ L volumes of 2M TEAA buffer only (no washing with H<sub>2</sub>O). Moving from (A) through (D), the number of sequential washings with 2M TEAA buffer is decreased sequentially from three to zero, and two observations can be made: (1) the abundance of low-mass peaks (~2000 amu) increases as the number of washes with 2M TEAA buffer decreases, suggesting some loss of lower MW products when washing with 2M TEAA; (2) the apparent abundance of 3' fragments increases, relative to 5'-fluorescein labeled fragments, as the number of washes with 2M TEAA buffer decreases, suggesting greater loss of non-labeled fragments, which are less hydrophobic, during washes with 2M TEAA. The lack of peaks observed in (F) demonstrates the necessity of washing with H<sub>2</sub>O (compare with (A)).

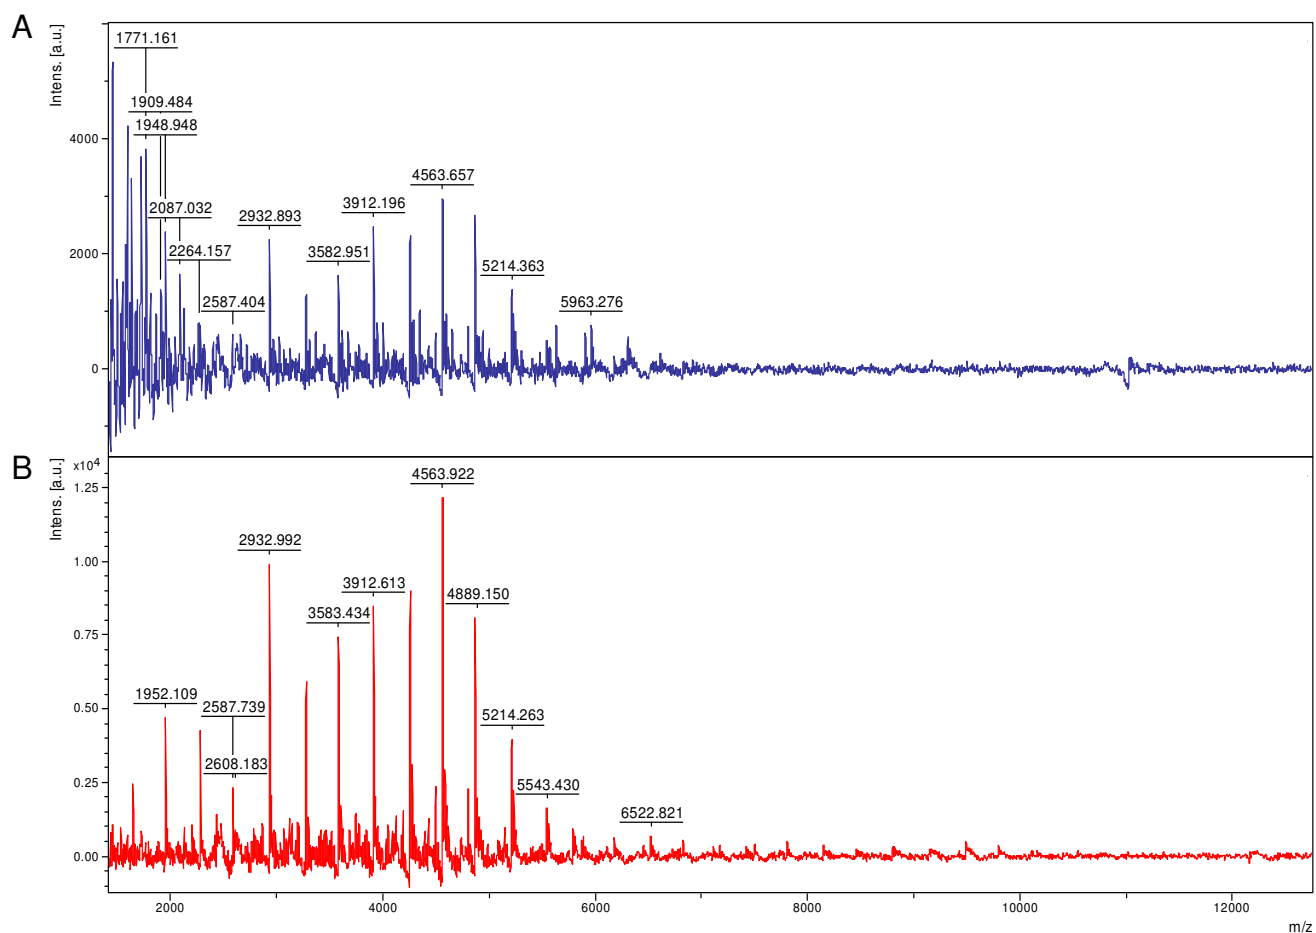

**Figure SM9.** Ethanol precipitation as the desalting method. (A) unlabelled RRE RNA (34mer) and (B) FI-RRE RNA. Catalyst Fe-EDTA-Rev (10  $\mu$ M) and H<sub>2</sub>O<sub>2</sub>/ascorbate (1 mM) were incubated for 1 h with either (A) 10  $\mu$ M unlabelled RRE RNA (34mer) or (B) FI-RRE RNA (36mer). Following reaction, samples were quenched and desalted as described by McKenzie et al (2012).<sup>1</sup>



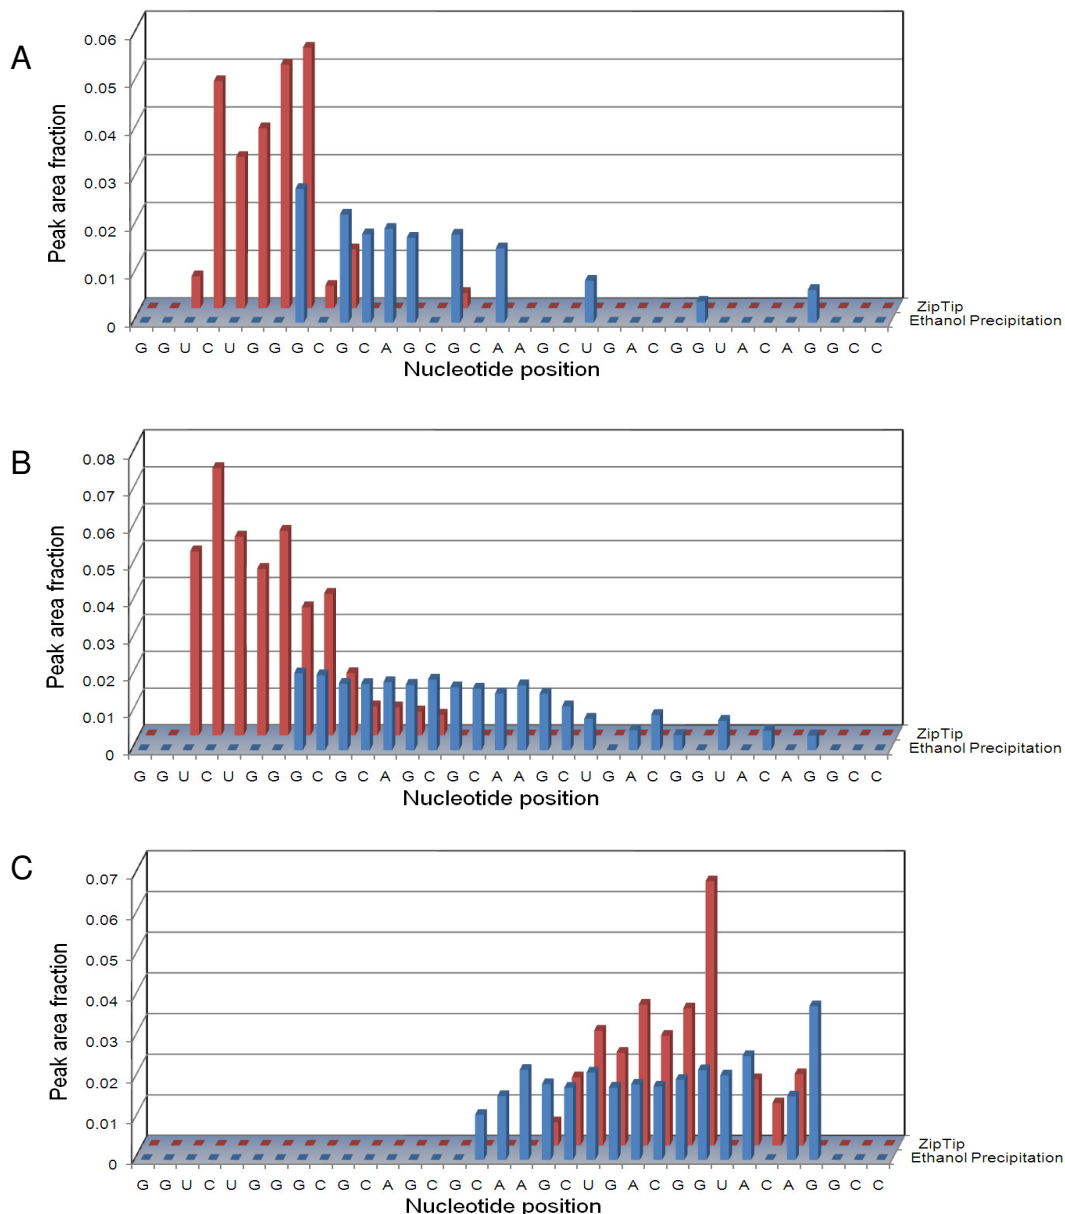

**Figure SM10.** Ethanol precipitation (front/blue) vs ZipTip desalting (rear/red). Catalyst Fe-EDTA-Rev (10  $\mu\text{M}$ ) and  $\text{H}_2\text{O}_2$ /ascorbate (1 mM) were incubated for 1 h with 10  $\mu\text{M}$  unlabelled RRE RNA (34mer), and the peak area fractions of all products were determined. (A) RNA cleavage fragments containing nascent terminal 3'-phosphates; (B) cleavage fragments containing nascent terminal 3'-phosphoglycolates; (C) cleavage fragments containing nascent terminal 5'-phosphates. Ethanol precipitation allowed identification of some larger RNA fragments that were not recovered following the ZipTip protocol. However, many of the smaller RNA fragments that were observed following the ZipTip protocol were lost during ethanol precipitation, as expected. The loss of lower-mass fragments could explain the higher peak area fractions for higher-mass fragments, that are seen for the ethanol precipitation method. Ethanol precipitation was performed as described by McKenzie et al (2012).<sup>1</sup>

| Before Base | Average % of fragmentation products |
|-------------|-------------------------------------|
| A           | 50 ± 40                             |
| U           | 20 ± 30                             |
| G           | 30 ± 40                             |
| C           | 6 ± 7                               |
|             |                                     |
| After Base  | Average % of fragmentation products |
| A           | 4 ± 7                               |
| U           | 5 ± 7                               |
| G           | 30 ± 30                             |
| C           | 60 ± 40                             |

**Table SM5.** Occurrence of background fragmentation, relative to base composition. The % abundance of fragmentation products containing nascent 2',3'-cyclic phosphates resulting from fragmentation either before or after each base, were determined for FI-16S RNA (at time zero in incubations with several catalysts and co-reactants). No significant dependence of fragmentation on base composition was observed.

| Before Base | Average % of fragmentation products |
|-------------|-------------------------------------|
| A           | 10 ± 20                             |
| U           | 10 ± 20                             |
| G           | 50 ± 30                             |
| C           | 20 ± 30                             |
|             |                                     |
| After Base  | Average % of fragmentation products |
| A           | 1 ± 2                               |
| U           | 40 ± 30                             |
| G           | 40 ± 30                             |
| C           | 20 ± 30                             |

**Table SM6.** Occurrence of background fragmentation, relative to base composition. The % abundance of fragmentation products containing nascent 2',3'-cyclic phosphates resulting from fragmentation either before or after each base, were determined for FI-RRE RNA (at time zero in incubations with several catalysts and co-reactants). No significant dependence of fragmentation on base composition was observed.

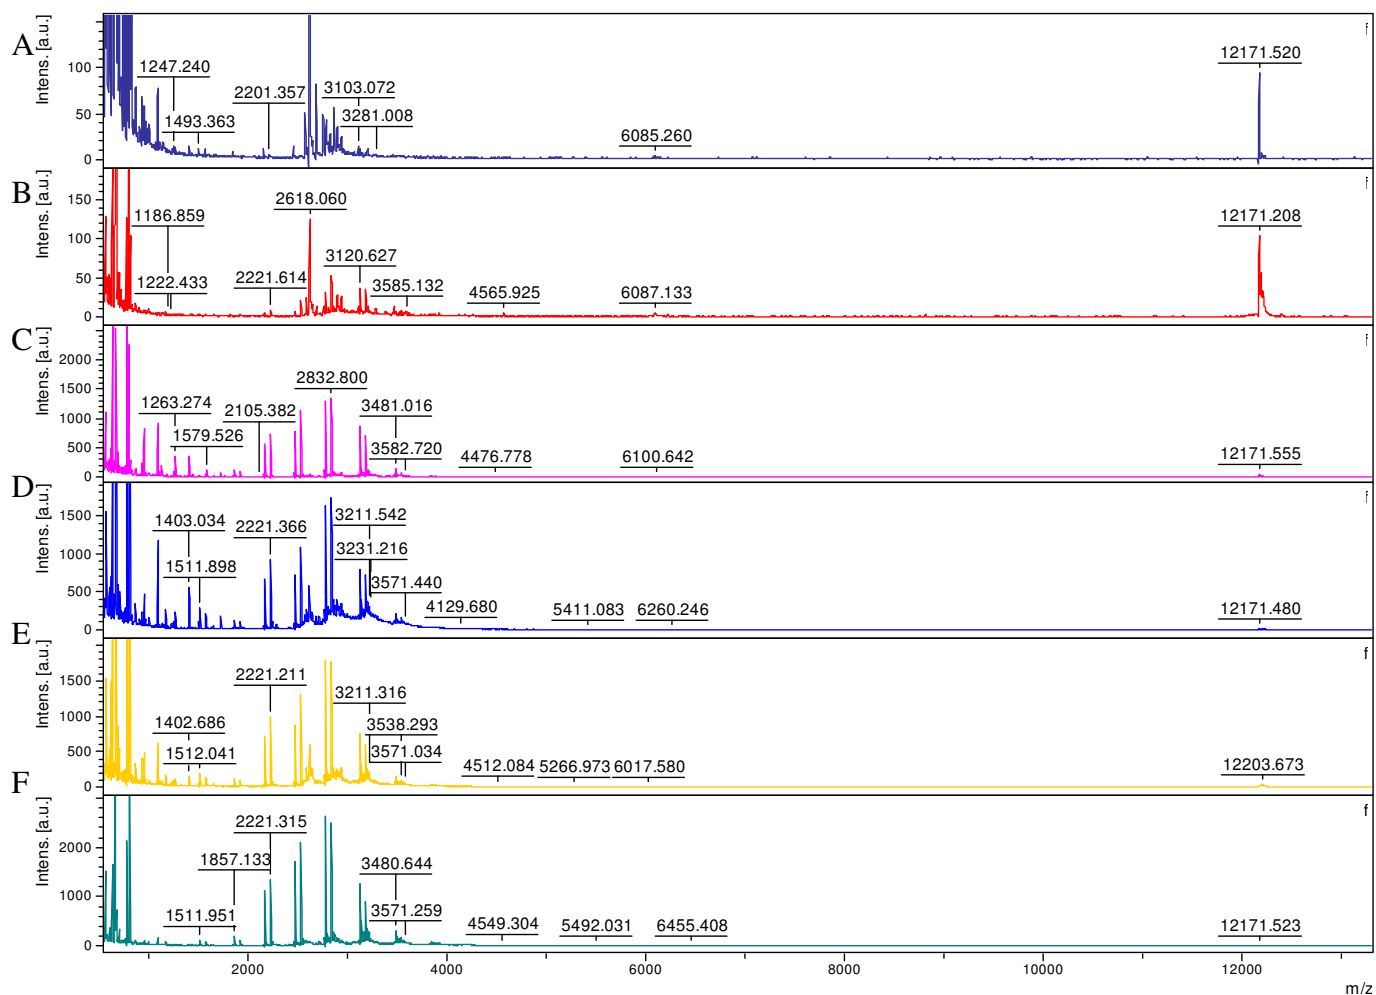

**Figure SM11.** MALDI-TOF mass spectra for time-dependent incubations of 10  $\mu$ M Cu-NTA-Rev, 1 mM  $H_2O_2$ /ascorbate, and 10  $\mu$ M FI-RRE RNA at 37  $^\circ$ C. (A) 0 min; (B) 2 min; (C) 7 min; (D) 10 min; (E) 20 min; (F) 30 min.

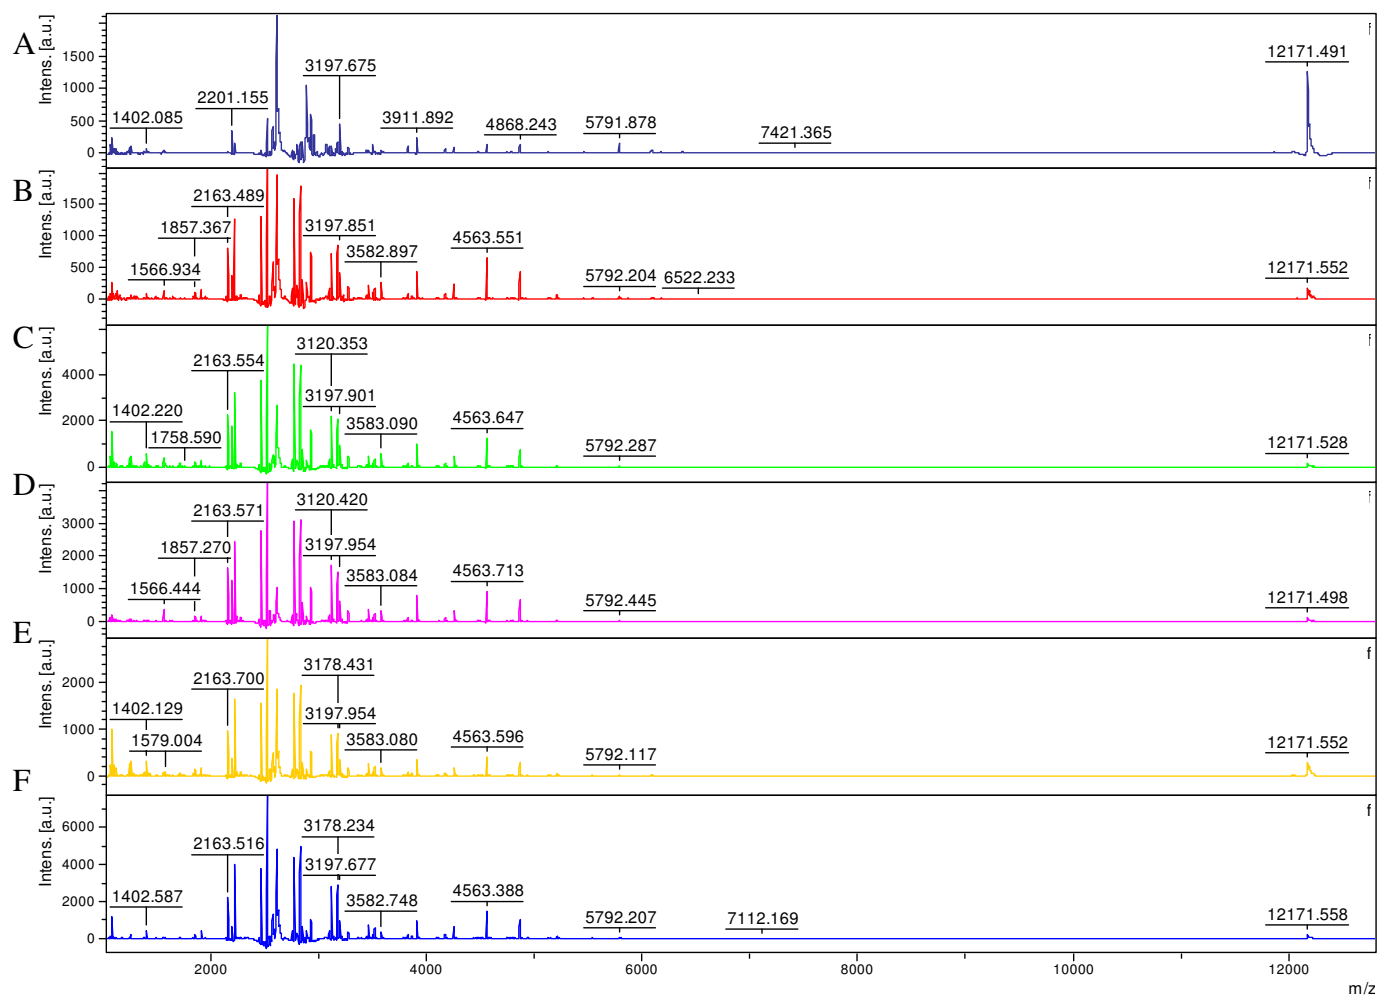

**Figure SM12.** MALDI-TOF mass spectra for time-dependent incubations of 10  $\mu\text{M}$  Fe-EDTA-Rev, 1 mM  $\text{H}_2\text{O}_2$ /ascorbate, and 10  $\mu\text{M}$  FI-RRE RNA at 37  $^\circ\text{C}$ . (A) 0 min; (B) 2 min; (C) 5 min; (D) 10 min; (E) 60 min; (F) 120 min.

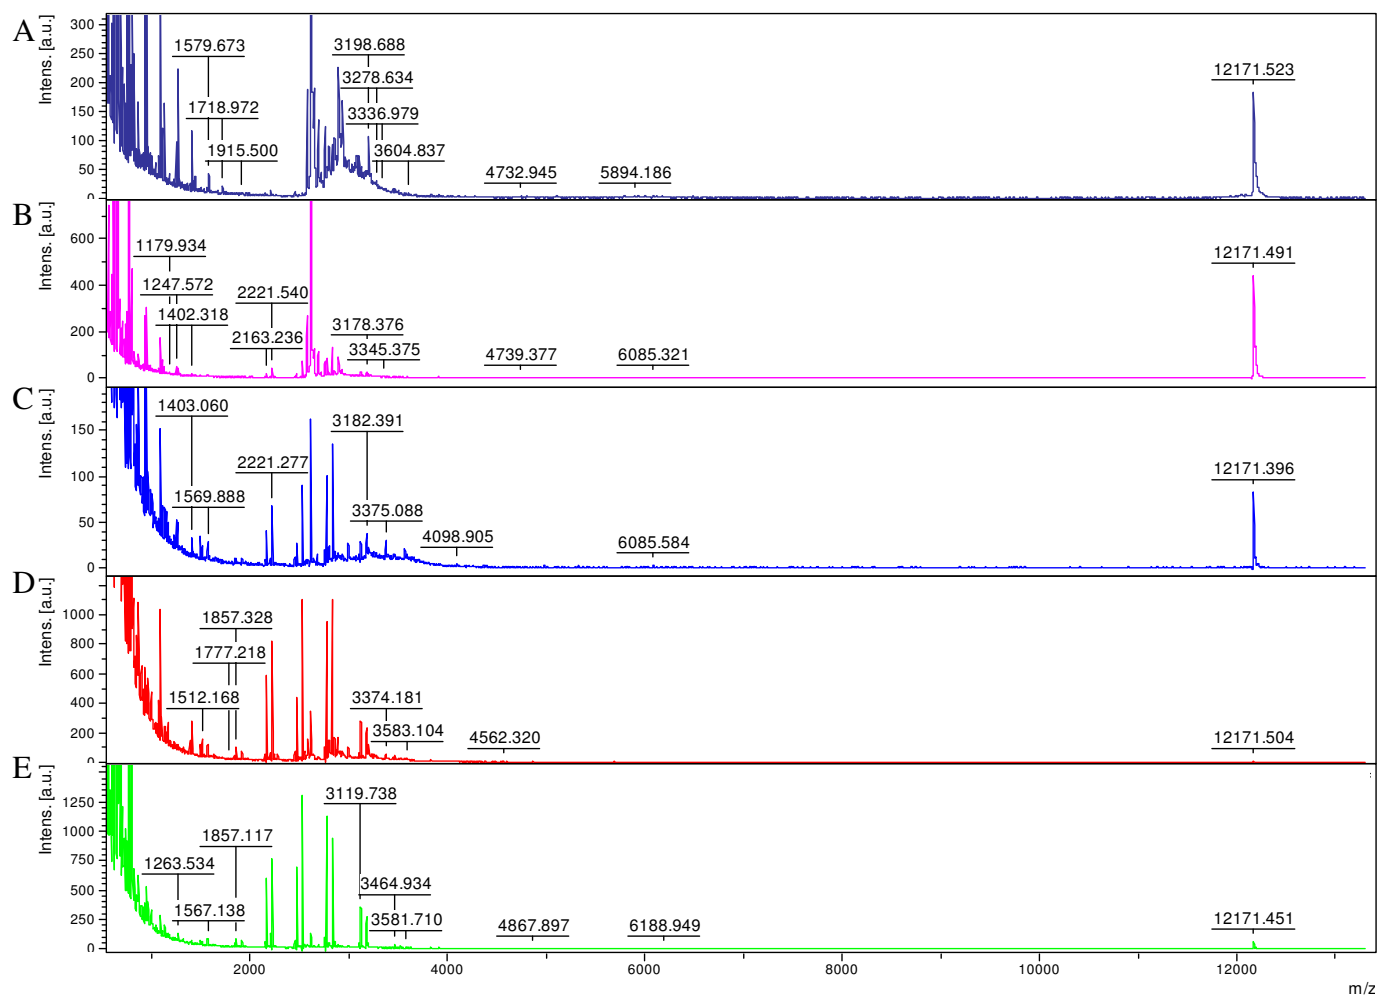

**Figure SM13.** MALDI-TOF mass spectra for time-dependent incubations of 10  $\mu$ M Fe-NTA-Rev, 1 mM  $H_2O_2$ /ascorbate, and 10  $\mu$ M FI-RRE RNA at 37  $^{\circ}C$ . (A) 0 min; (B) 5 min; (C) 10 min; (D) 30 min; (E) 45 min.

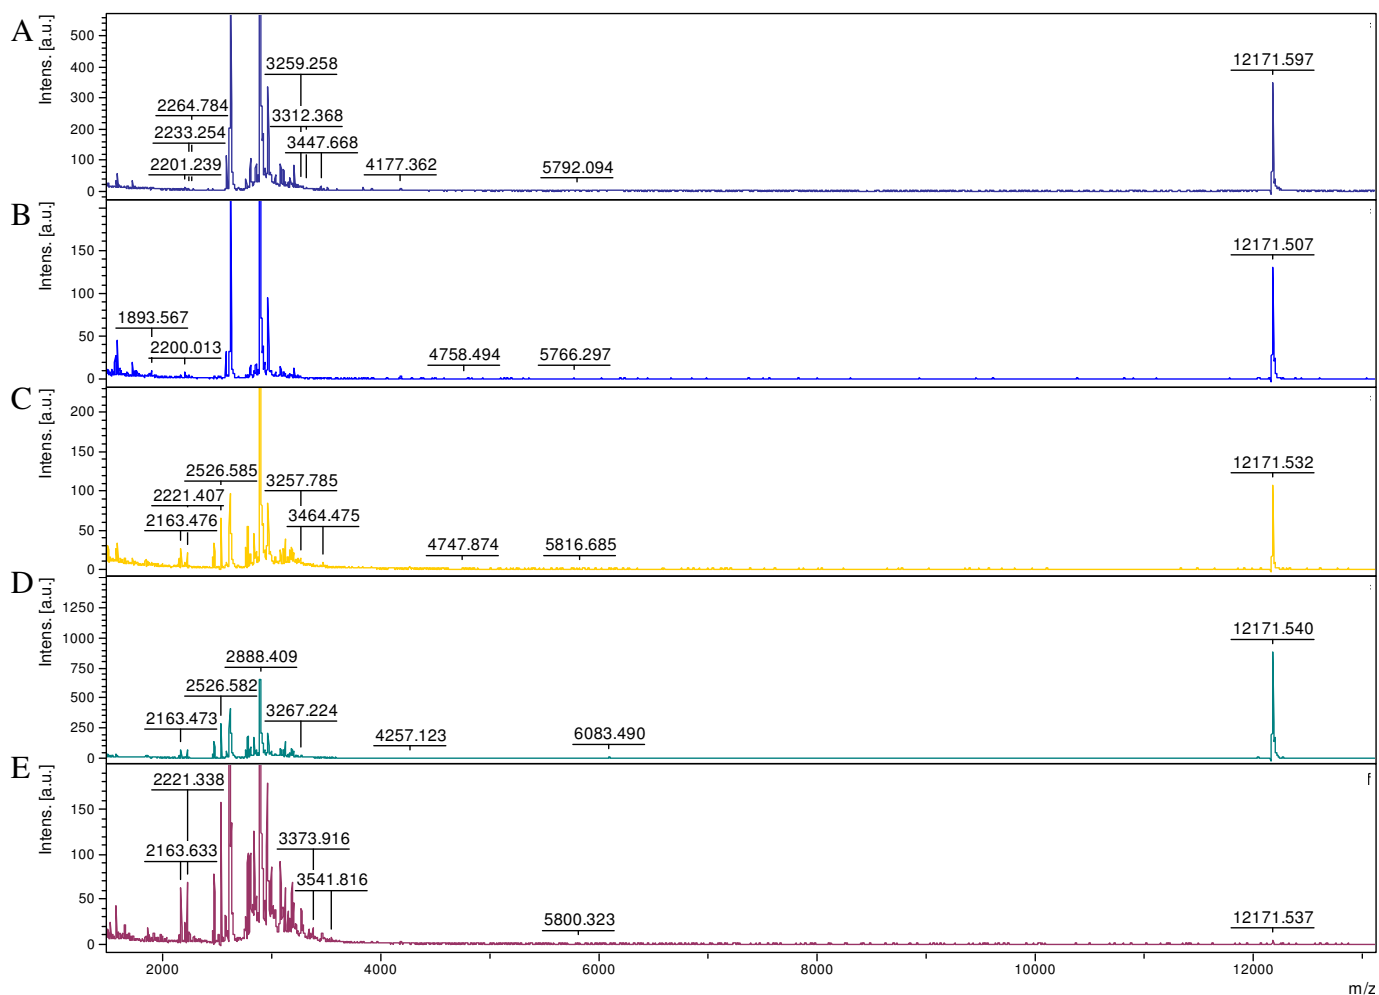

**Figure SM14.** MALDI-TOF mass spectra for time-dependent incubations of 10  $\mu$ M Cu-EDTA-Rev, 1 mM H<sub>2</sub>O<sub>2</sub>/ascorbate, and 10  $\mu$ M FI-RRE RNA at 37 °C. (A) 0 min; (B) 10 min; (C) 20 min; (D) 30 min; (E) 45 min.

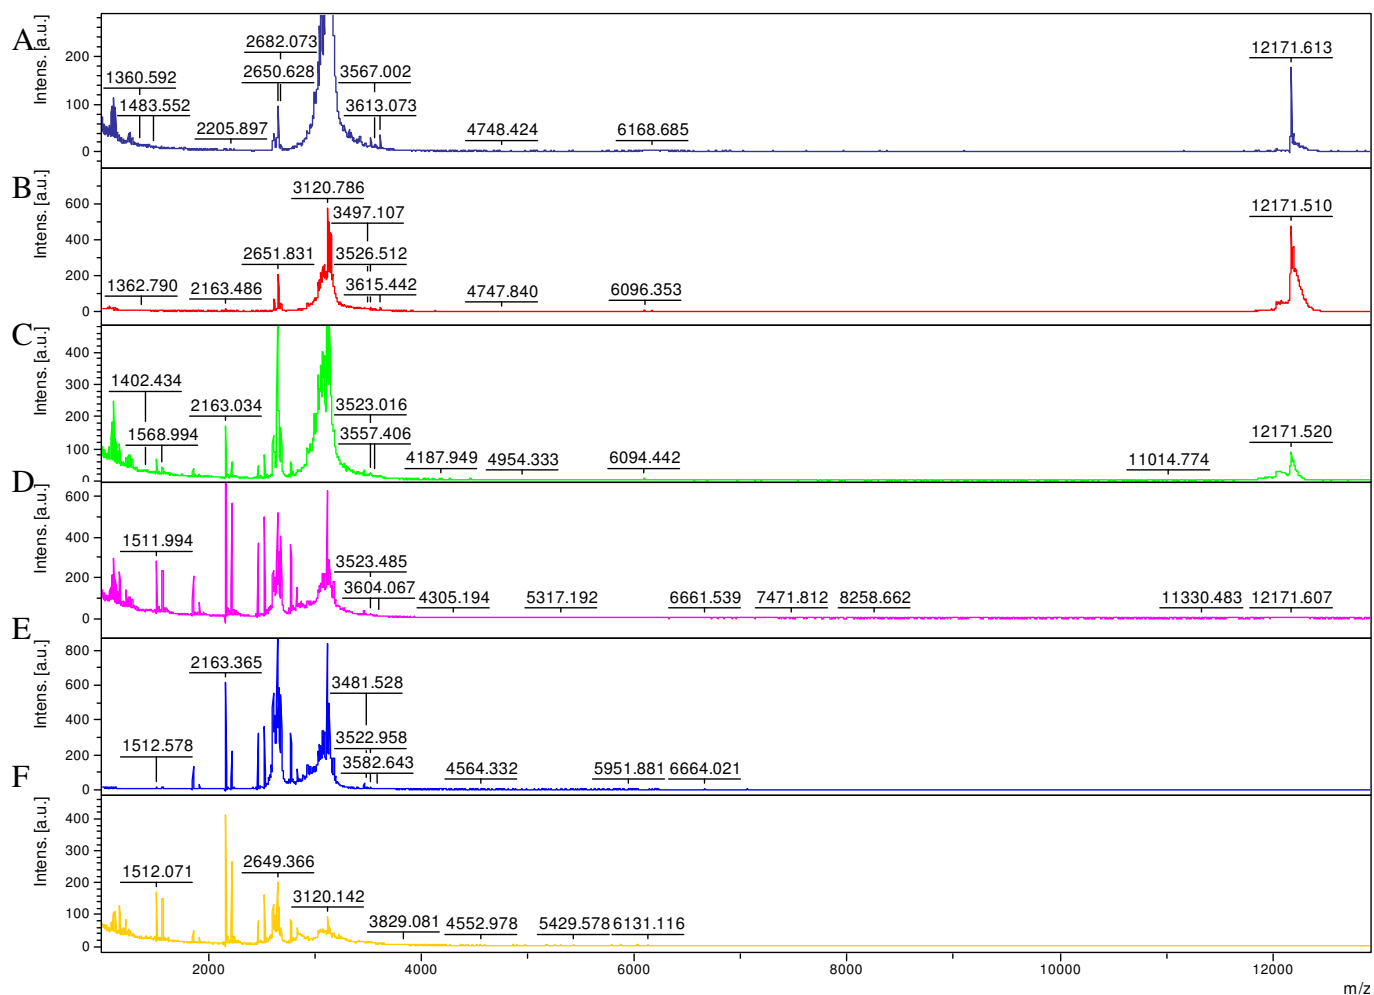

**Figure SM15.** MALDI-TOF mass spectra for time-dependent incubations of 10  $\mu$ M Fe-DTPA-Rev, 1 mM H<sub>2</sub>O<sub>2</sub>/ascorbate, and 10  $\mu$ M FI-RRE RNA at 37 °C. (A) 0 min; (B) 30 min; (C) 60 min; (D) 90 min; (E) 120 min; (F) 180 min.



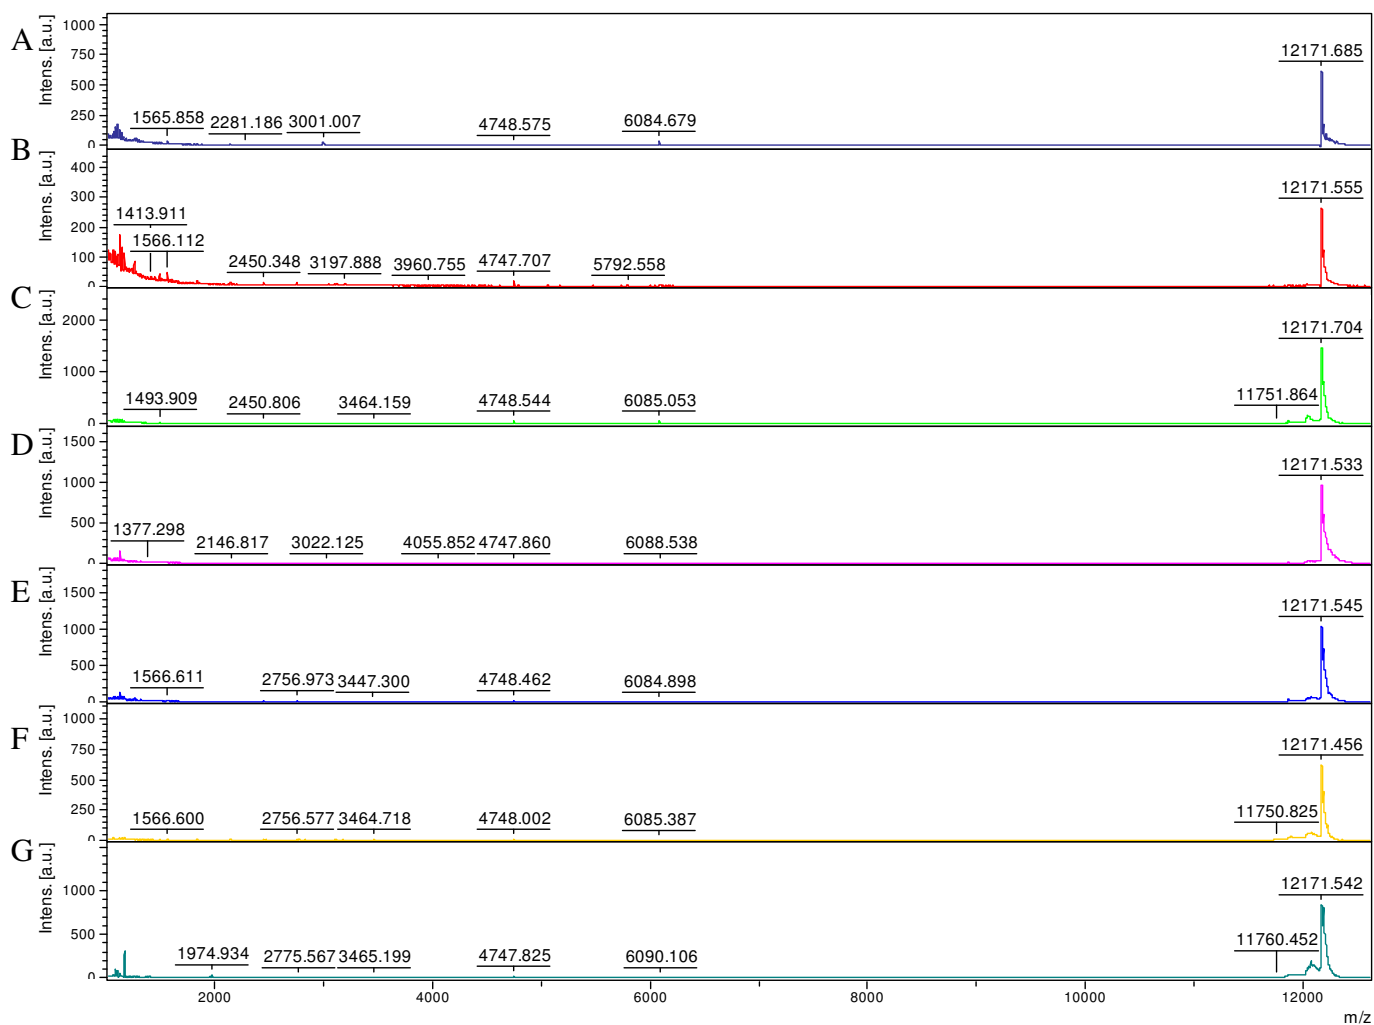

**Figure SM16.** MALDI-TOF mass spectra for time-dependent incubations of 1 mM H<sub>2</sub>O<sub>2</sub>/ascorbate (no catalyst), and 10 μM FI-RRE RNA at 37 °C. (A) 0 min; (B) 30 min; (C) 60 min; (D) 90 min; (E) 120 min; (F) 150 min; (G) 180 min.

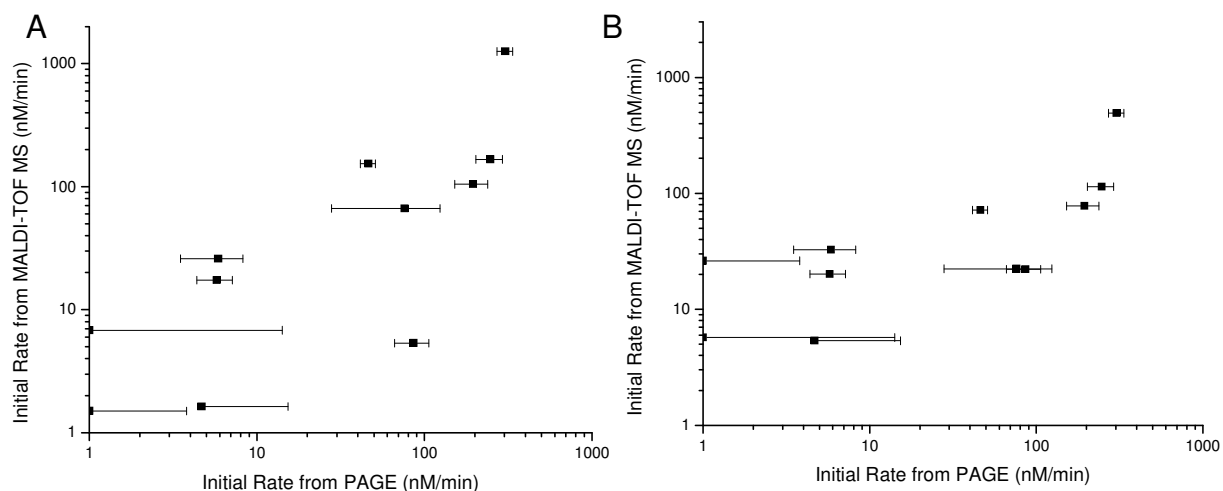

**Figure SM17.** Comparison of MALDI-TOF MS vs 5'-fluorescein-monitored PAGE analysis for time-dependent cleavage of FI-RRE RNA by various ribonuclease mimics (a similar analysis to that shown for FI-16S RNA in the main text). For MALDI-TOF MS, initial rates of cleavage were obtained for a series of reactions by use of either (A) method 1 or (B) method 2 (y-axes of A and B). For PAGE analysis, initial rates were obtained for the same reactions as the rate of disappearance of full-length RNA (x-axes of A and B). For FI-RRE RNA (12172.5 Da), the rates were generally within ~6-fold agreement between the MALDI-TOF MS and PAGE assays (with only one exception for either method). For FI-16S RNA (9176.7 Da), the rates were generally within ~2-fold agreement between the MALDI-TOF MS and PAGE assays. The decrease in accuracy of the MALDI-TOF MS method for FI-RRE RNA, relative to the smaller FI-16S RNA, most likely reflects mass bias effects of the MALDI-TOF MS method.

| catalyst    | Apparent Initial Rate of RNA Modification (nM/min) |                |             |                     |
|-------------|----------------------------------------------------|----------------|-------------|---------------------|
|             | MALDI method 1                                     | MALDI method 2 | PAGE        | AP-RNA <sup>a</sup> |
| Fe-EDTA-Rev | 1100                                               | 500            | 4000 ± 1000 | 5200 ± 100          |
| Cu-NTA-Rev  | 1300                                               | 500            | 300 ± 30    | 1400 ± 100          |
| Fe-NTA-Rev  | 200                                                | 100            | 250 ± 40    | 3200 ± 100          |
| Cu-EDTA-Rev | 200                                                | 70             | 46 ± 5      | ~ 0                 |
| Fe-DTPA-Rev | 100                                                | 80             | 190 ± 40    | n.d.                |
| Co-NTA-Rev  | 26                                                 | 30             | 6 ± 2       | 640 ± 20            |
| Ni-NTA-Rev  | 10                                                 | 20             | 90 ± 20     | n.d.                |
| Co-EDTA-Rev | 18                                                 | 20             | 6 ± 1       | 0 ± 1               |
| Co-KGHK-Rev | 10                                                 | 6              | < 11        | n.d.                |
| Ni-KGHK-Rev | 2                                                  | 5              | < 15        | n.d.                |
| Cu-KGHK-Rev | 70                                                 | 20             | 80 ± 50     | n.d.                |
| None        | 2                                                  | 30             | 1 ± 3       | 4.0 ± 0.5           |

**Table SM7.** Comparison of MALDI-TOF MS, PAGE, and fluorimetry (AP-RNA) assays for quantification of the initial rate of modification of RRE RNA. Reactions contained 10  $\mu$ M RNA (FI-RRE RNA for MALDI and PAGE; AP-RNA for the fluorimetry assay), 1 mM H<sub>2</sub>O<sub>2</sub>/ascorbate, and 10  $\mu$ M catalyst (if present). <sup>a</sup> The AP-RNA construct corresponds to RRE RNA with an internal 2-aminopurine, the fluorescence of which decreases upon a conformational change in the RNA, following reaction; rates for the AP-RNA assay tend to be higher than for the PAGE assay, due to differences in what is being monitored, as described previously.<sup>2</sup>

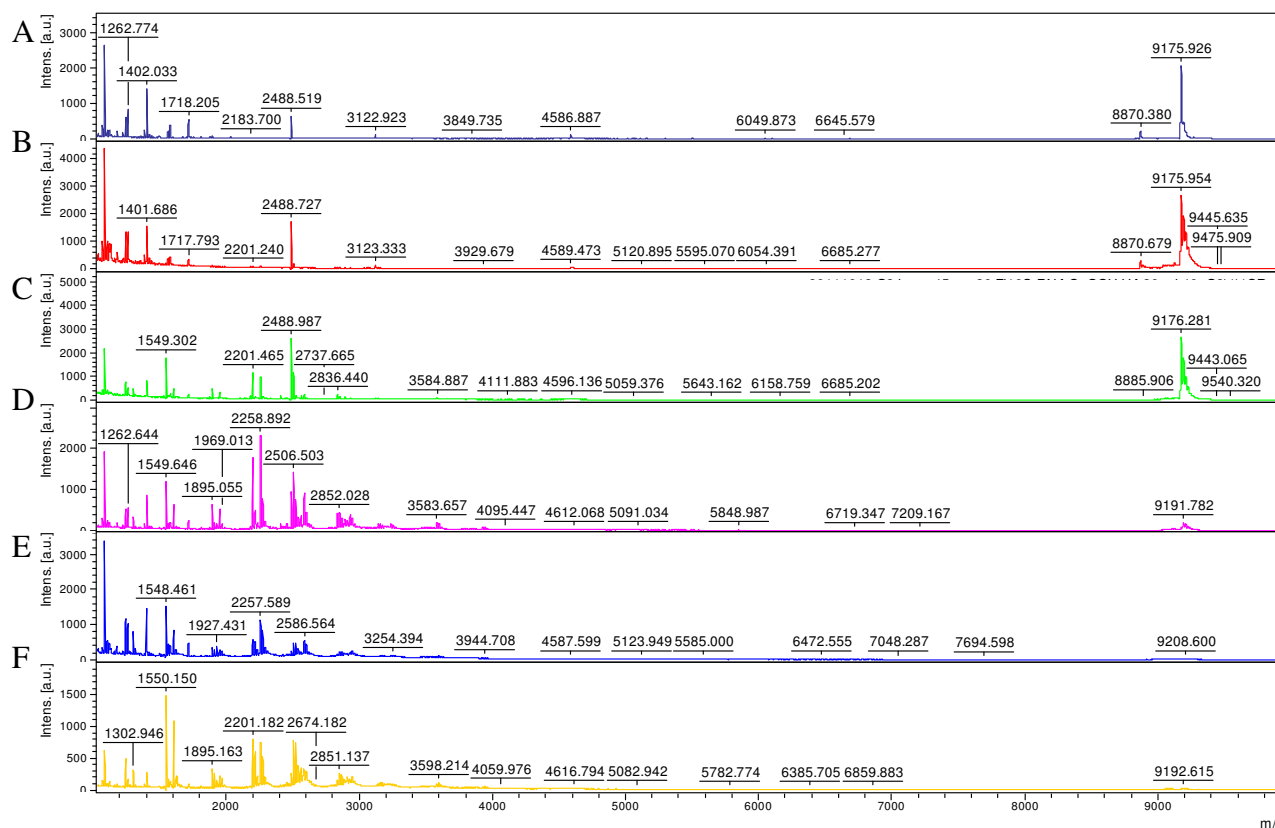

**Figure SM18.** MALDI-TOF mass spectra for time-dependent incubations of 10  $\mu$ M Cu-GGH, 1 mM  $H_2O_2$ /ascorbate, and 10  $\mu$ M FI-16S RNA at 37  $^{\circ}C$ . (A) 0 min; (B) 15 min; (C) 30 min; (D) 60 min; (E) 90 min; (F) 120 min.

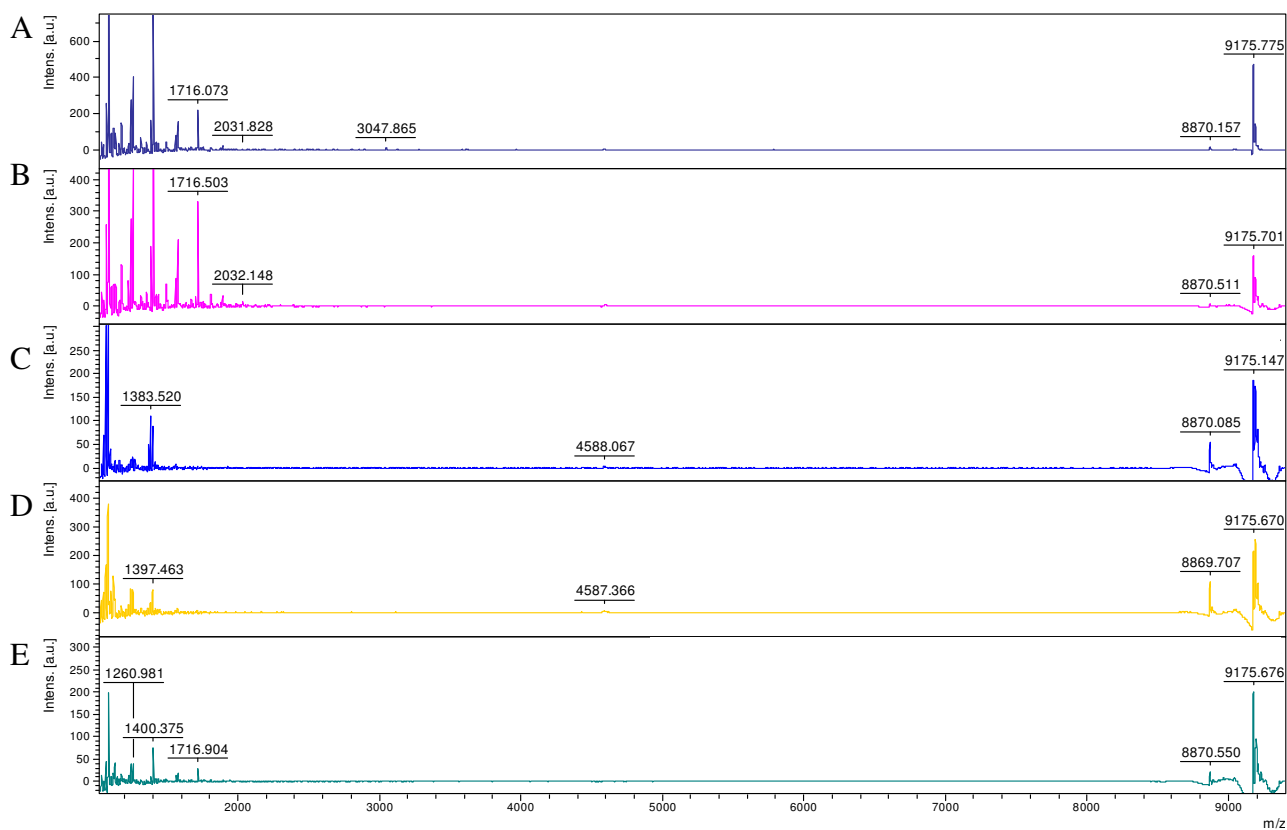

**Figure SM19.** MALDI-TOF mass spectra for time-dependent incubations of 1 mM H<sub>2</sub>O<sub>2</sub>/ascorbate (no catalyst), and 10 μM FI-16S RNA at 37 °C. (A) 0 min; (B) 30 min; (C) 40 min; (D) 90 min; (E) 120 min.

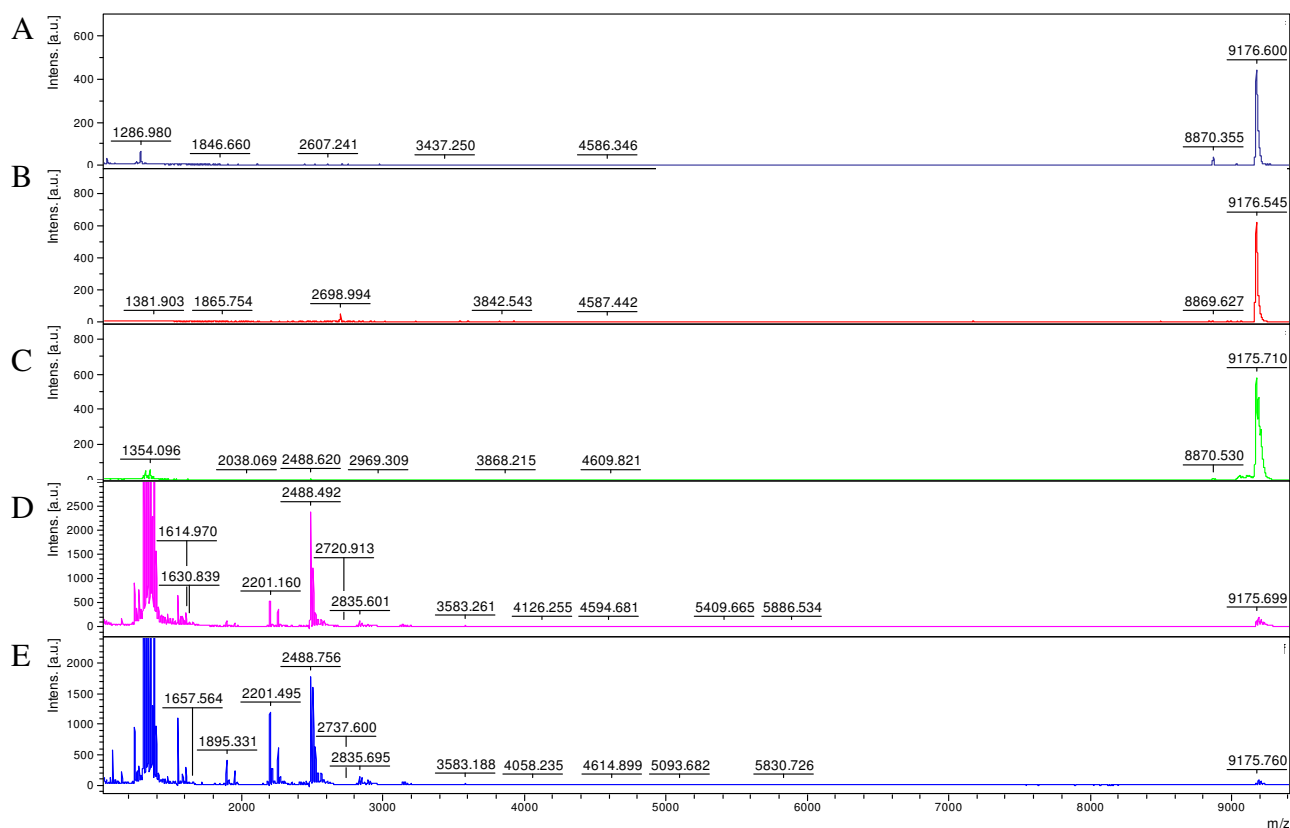

**Figure SM20.** MALDI-TOF mass spectra for time-dependent incubations of 10  $\mu$ M Cu-PEP204, 1 mM  $H_2O_2$ /ascorbate, and 10  $\mu$ M FI-16S RNA at 37  $^{\circ}C$ . (A) 0 min; (B) 10 min; (C) 40 min; (D) 90 min; (E) 120 min.

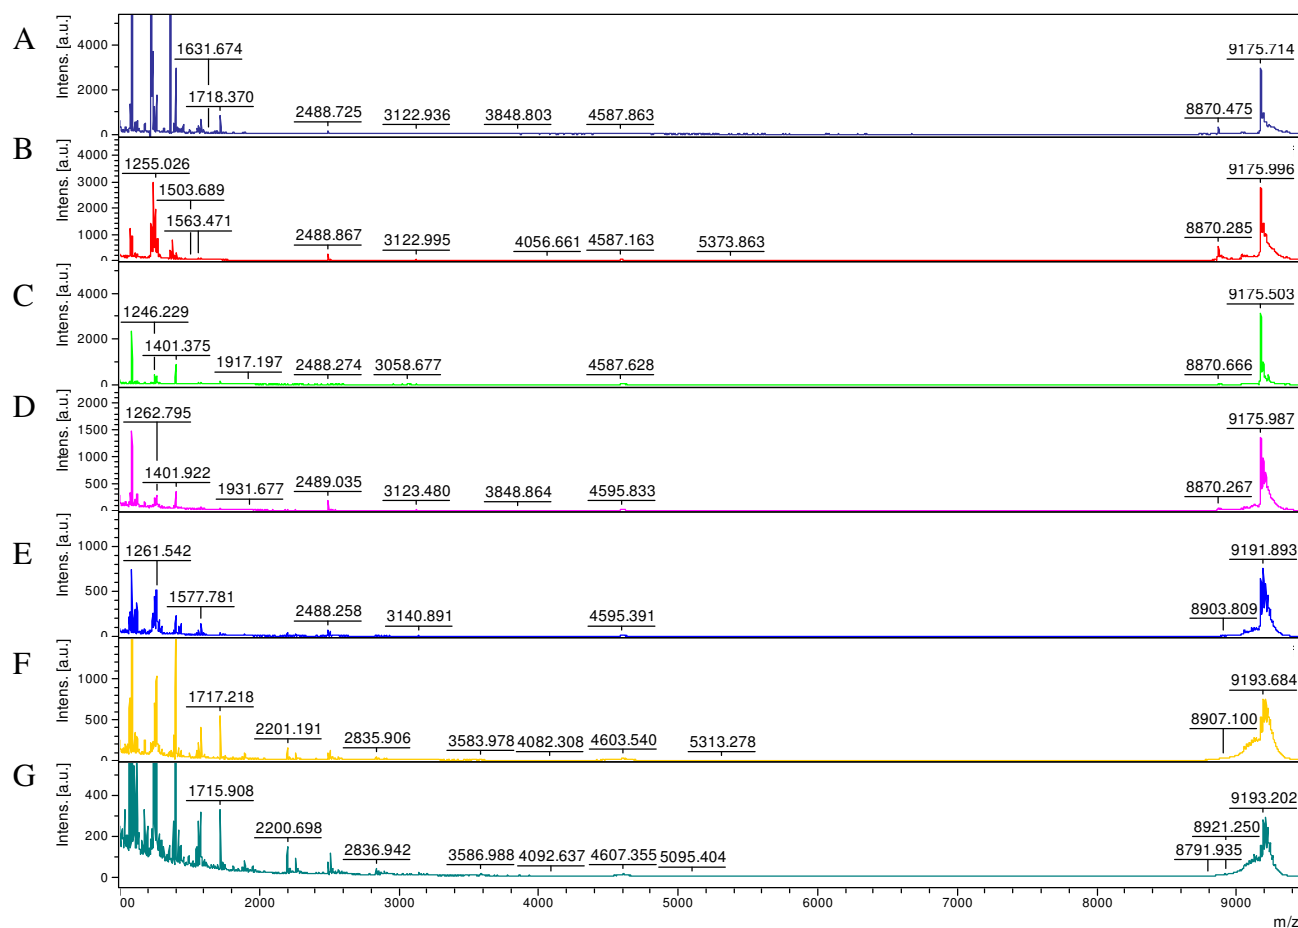

**Figure SM21.** MALDI-TOF mass spectra for time-dependent incubations of 10  $\mu$ M Cu-PEP201, 1 mM  $H_2O_2$ /ascorbate, and 10  $\mu$ M FI-16S RNA at 37  $^{\circ}C$ . (A) 0 min; (B) 10 min; (C) 20 min; (D) 30 min; (E) 60 min; (F) 90 min; (G) 120 min.

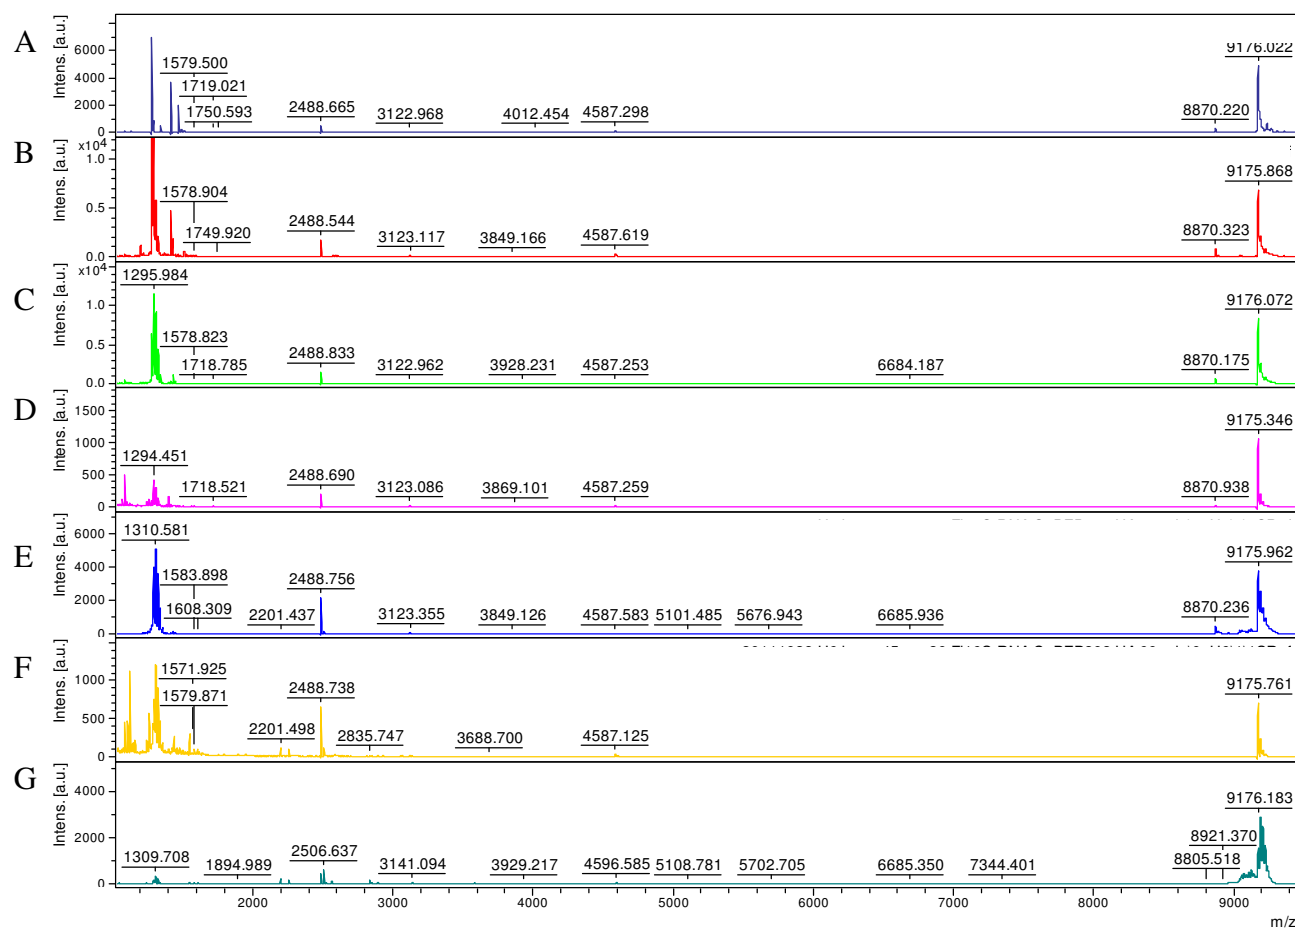

**Figure SM22.** MALDI-TOF mass spectra for time-dependent incubations of 10  $\mu$ M Cu-PEP202, 1 mM  $H_2O_2$ /ascorbate, and 10  $\mu$ M FI-16S RNA at 37  $^{\circ}C$ . (A) 0 min; (B) 10 min; (C) 20 min; (D) 30 min; (E) 40 min; (F) 60 min; (G) 90 min.



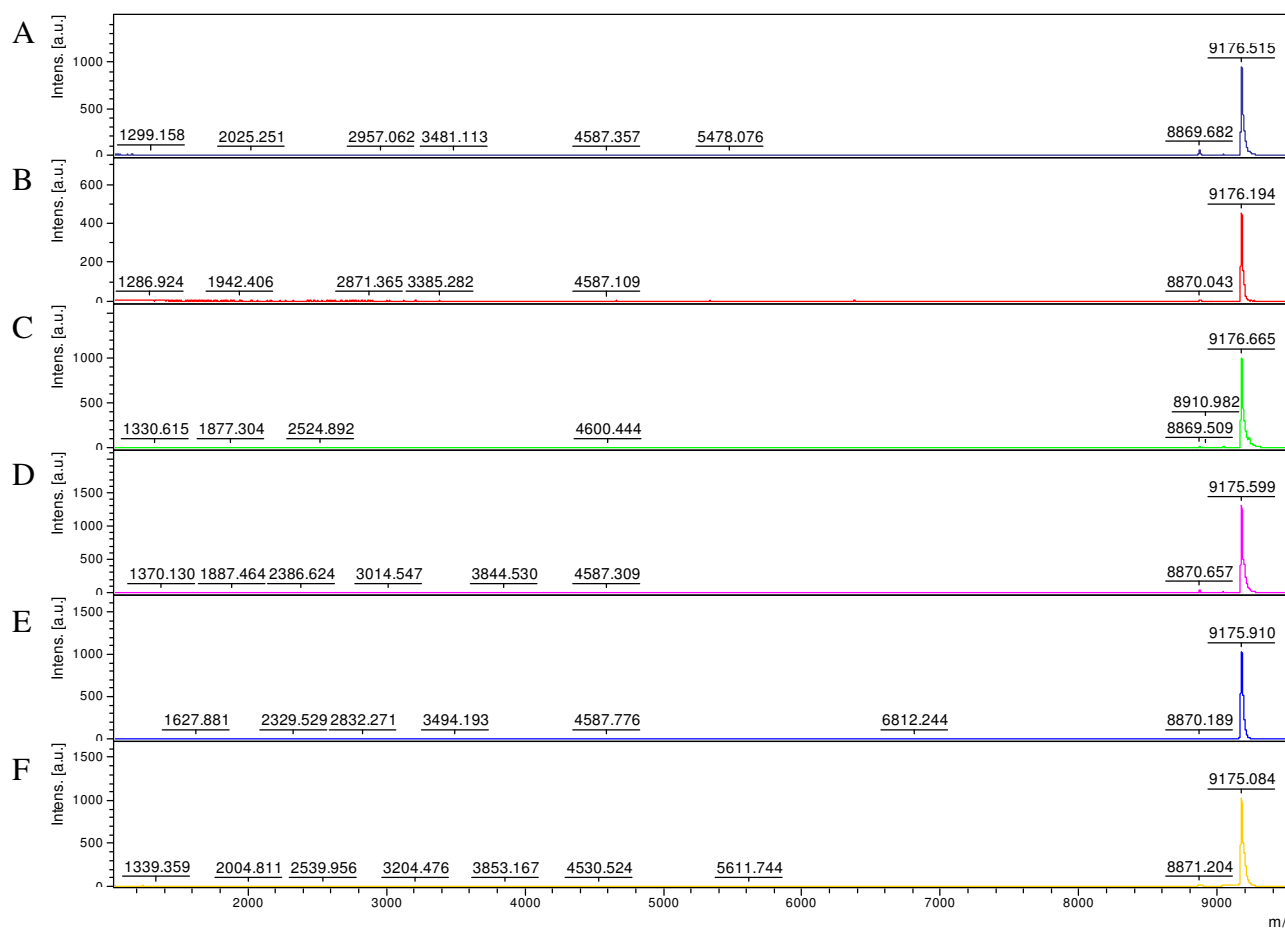

**Figure SM23.** MALDI-TOF mass spectra for time-dependent incubations of 10  $\mu$ M Cu-PEP203, 1 mM  $H_2O_2$ /ascorbate, and 10  $\mu$ M FI-16S RNA at 37  $^{\circ}C$ . (A) 0 min; (B) 10 min; (C) 20 min; (D) 30 min; (E) 60 min; (F) 120 min.

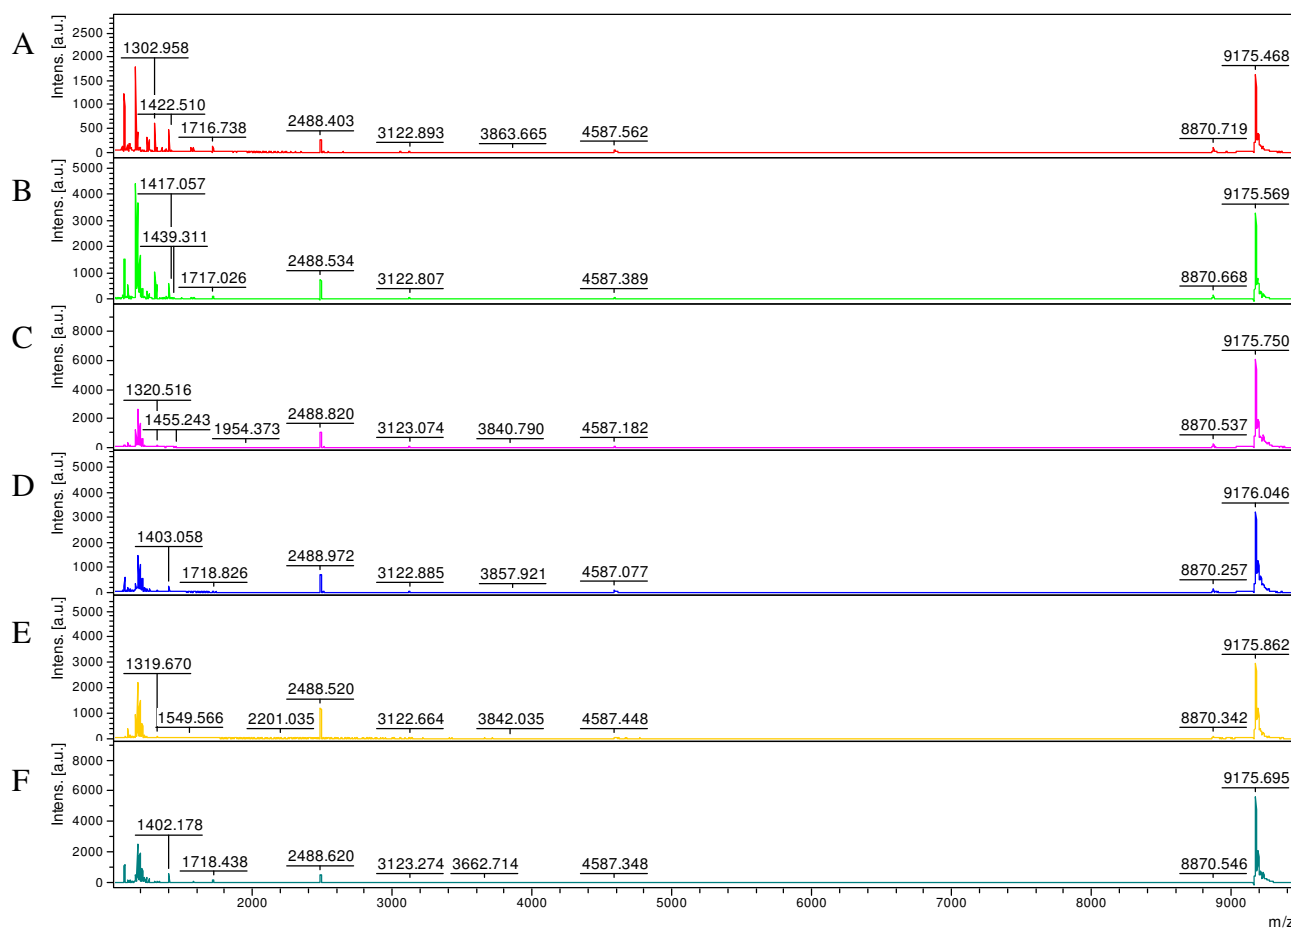

**Figure SM24.** MALDI-TOF mass spectra for time-dependent incubations of 10  $\mu$ M Cu-PEP209, 1 mM  $H_2O_2$ /ascorbate, and 10  $\mu$ M FI-16S RNA at 37  $^{\circ}C$ . (A) 10 min; (B) 20 min; (C) 30 min; (D) 60 min; (E) 90 min; (F) 120 min.

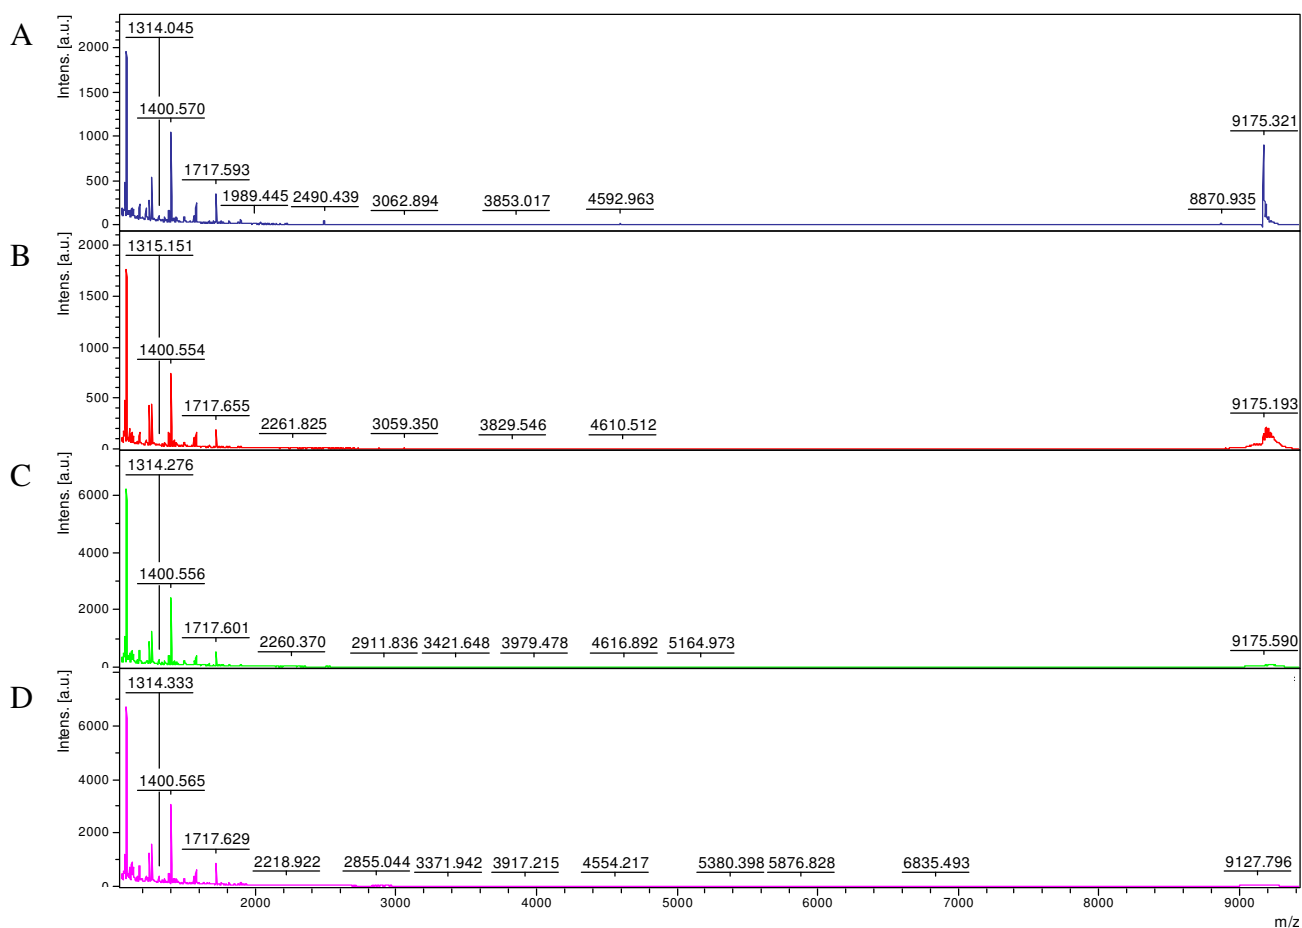

**Figure SM25.** MALDI-TOF mass spectra for time-dependent incubations of 10  $\mu$ M free Cu, 1 mM  $H_2O_2$ /ascorbate, and 10  $\mu$ M FI-16S RNA at 37  $^{\circ}C$ . (A) 0 min; (B) 5 min; (C) 10 min; (D) 20 min.

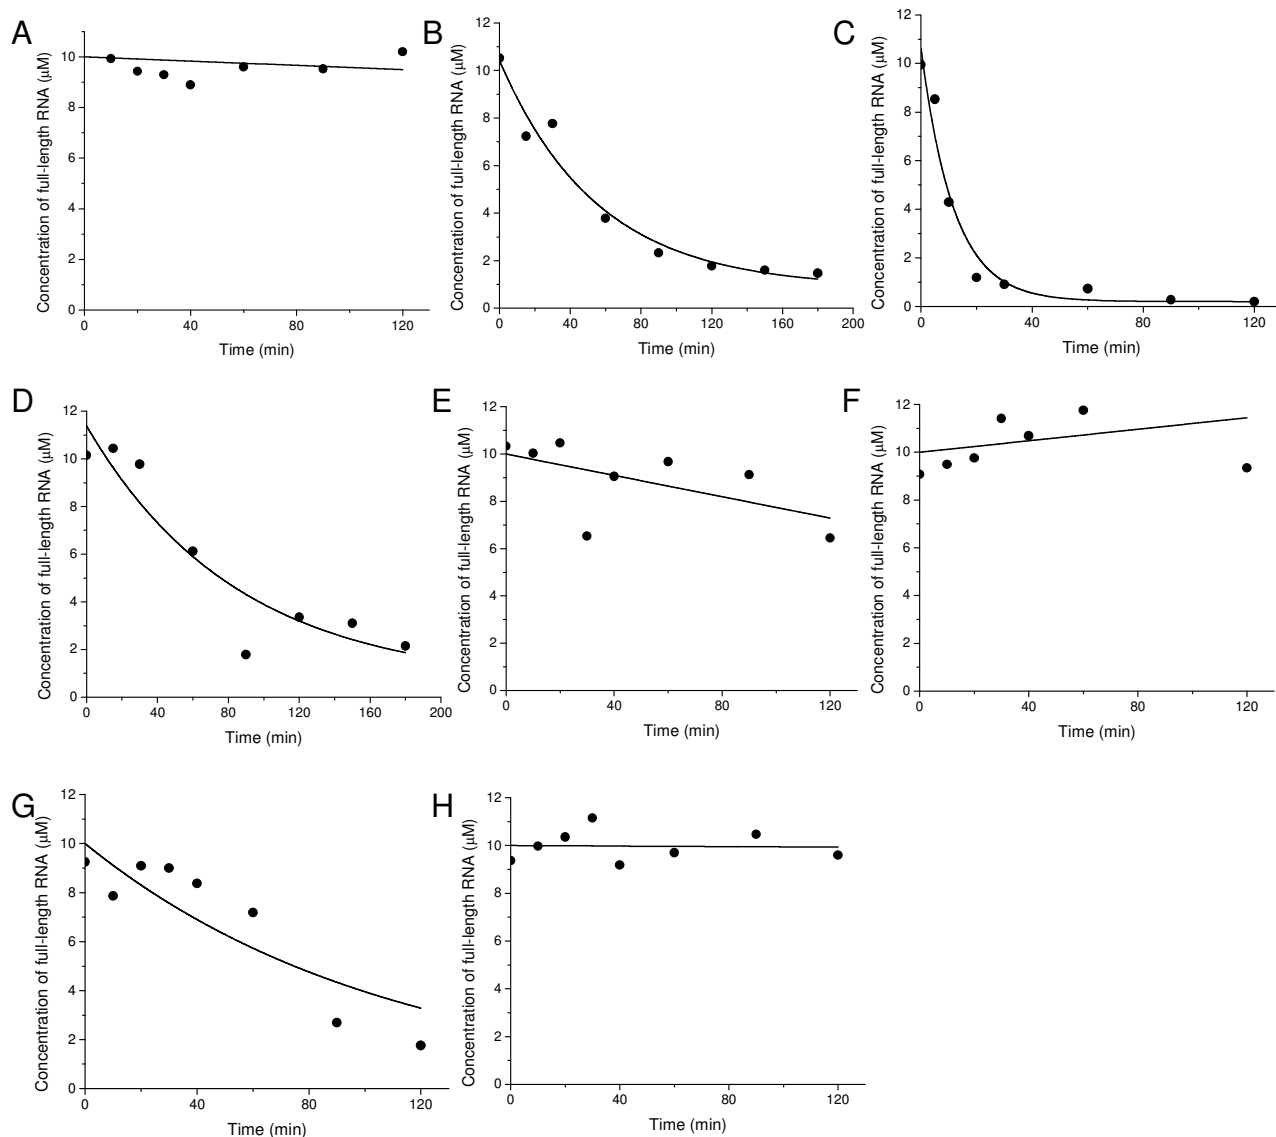

**Figure SM26.** PAGE analysis of time-dependent incubations of 10  $\mu\text{M}$  FI-16S RNA at 37  $^{\circ}\text{C}$  with 1 mM  $\text{H}_2\text{O}_2$ /ascorbate and: (A) none; (B) 10  $\mu\text{M}$  Cu-GGH; (C) 10  $\mu\text{M}$  free Cu; (D) 10  $\mu\text{M}$  Cu-PEP201; (E) Cu-PEP202; (F) Cu-PEP203; (G) Cu-PEP204; (H) Cu-PEP209. The disappearance of full-length FI-16S RNA over time was fit to a first-order decay model in order to obtain initial rates of cleavage (nM/min).

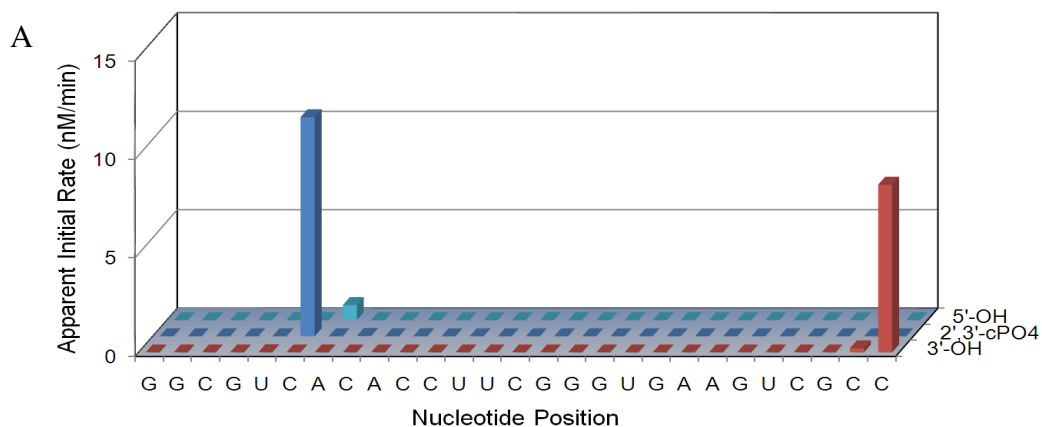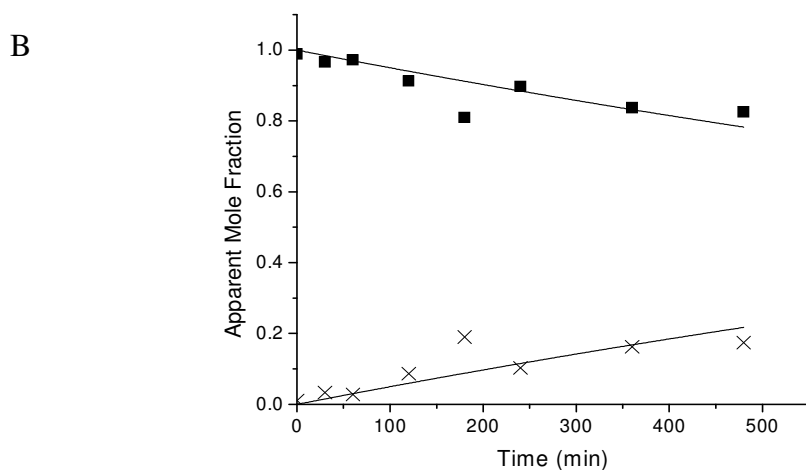

| Species (direction)        | Obsd. m/z (Da) | Initial rate from MALDI-TOF MS (nM/min) | Initial rate from PAGE (nM/min) |
|----------------------------|----------------|-----------------------------------------|---------------------------------|
| Fl-16S RNA (disappearance) | 9175.7         | 9 ± 4                                   | 5 ± 1 (■)                       |
| 5'-Fl-6mer (appearance)    | 2488.6         | 11 ± 4                                  | 5 ± 1 (×)                       |
| 3'-21-mer (appearance)     | 6686           | 0.8 ± 0.2                               | Not labeled                     |

**Figure SM27.** Comparison of (A) MALDI-TOF MS vs (B) PAGE analysis for the kinetics of cleavage of 10  $\mu$ M Fl-16S RNA by 10  $\mu$ M PEP204. Cleavage occurs at a single site, giving two RNA fragments of different mass. Disappearance of full-length RNA and the appearance of products were monitored by both MALDI-TOF MS and PAGE, and the initial rates were compared between the two assays, demonstrating the semi-quantitative ability of the MALDI-TOF MS method.

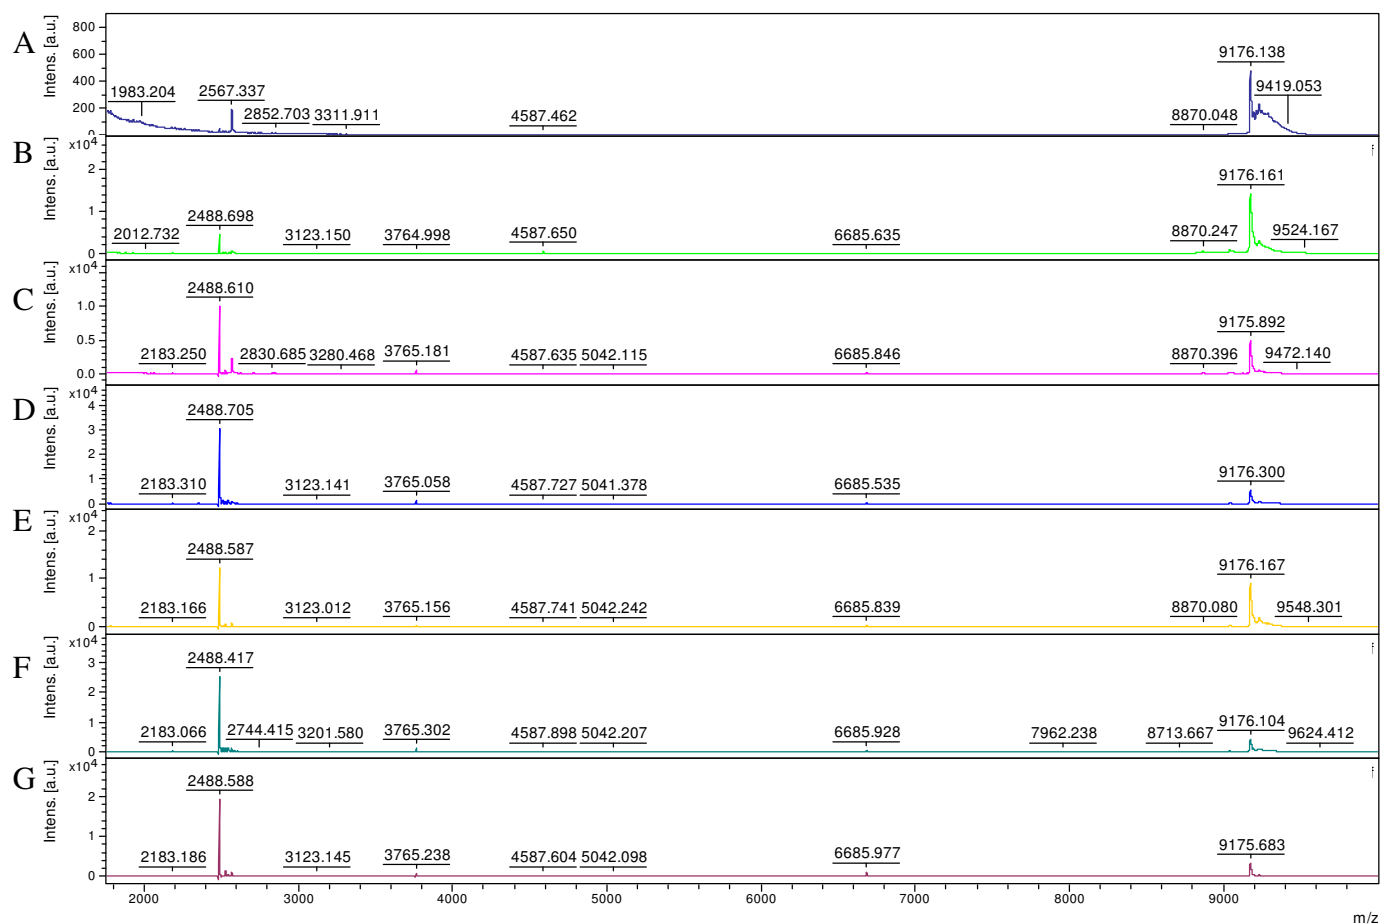

**Figure SM28.** MALDI-TOF mass spectra for time-dependent incubations of 10  $\mu$ M PEP204 and 10  $\mu$ M FI-16S RNA at 37  $^{\circ}$ C (the reaction shown in Figure SM27). (A) 0 min; (B) 60 min; (C) 120 min; (D) 180 min; (E) 240 min; (F) 360 min; (G) 480 min.

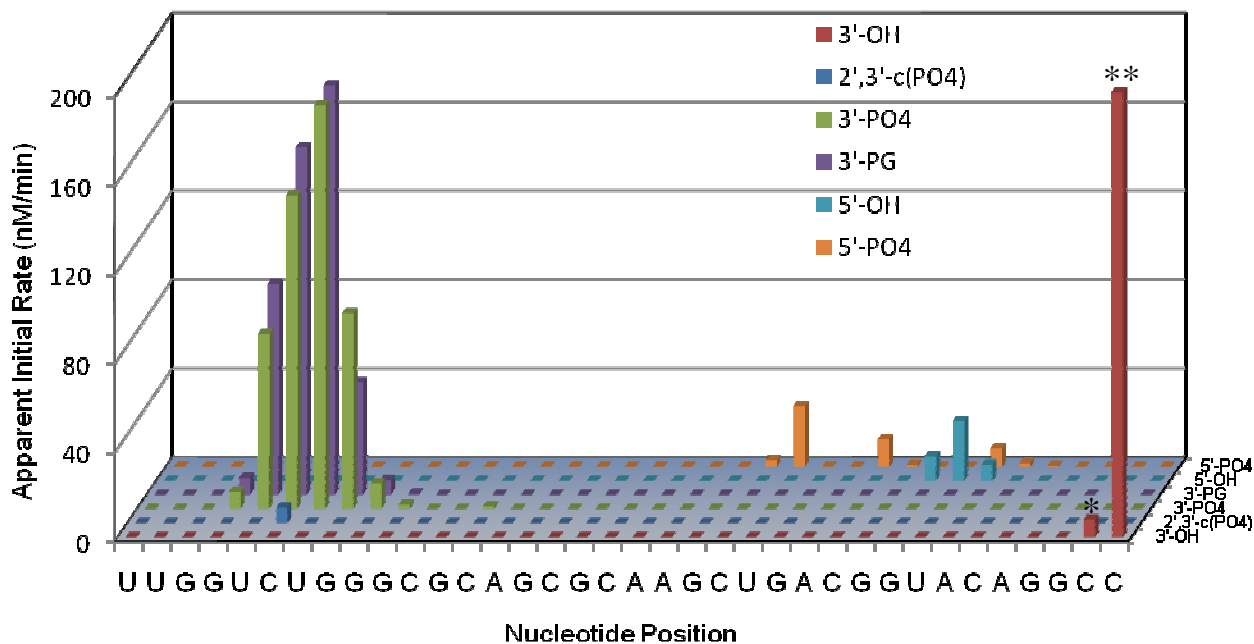

**Figure SM29.** Apparent initial rates of formation of RNA fragments containing the listed overhangs at the listed nascent termini, resulting from cleavage of 10  $\mu$ M Fl-RRE RNA by 10  $\mu$ M Fe-EDTA-Rev, 1 mM  $H_2O_2$ , and 1 mM ascorbate. Apparent initial rates of disappearance of the full-length 36-mer Fl-RRE RNA (\*\*), and the 35-mer impurity (\*), were 660 nM/min (abbreviated in figure) and 8 nM/min, respectively.

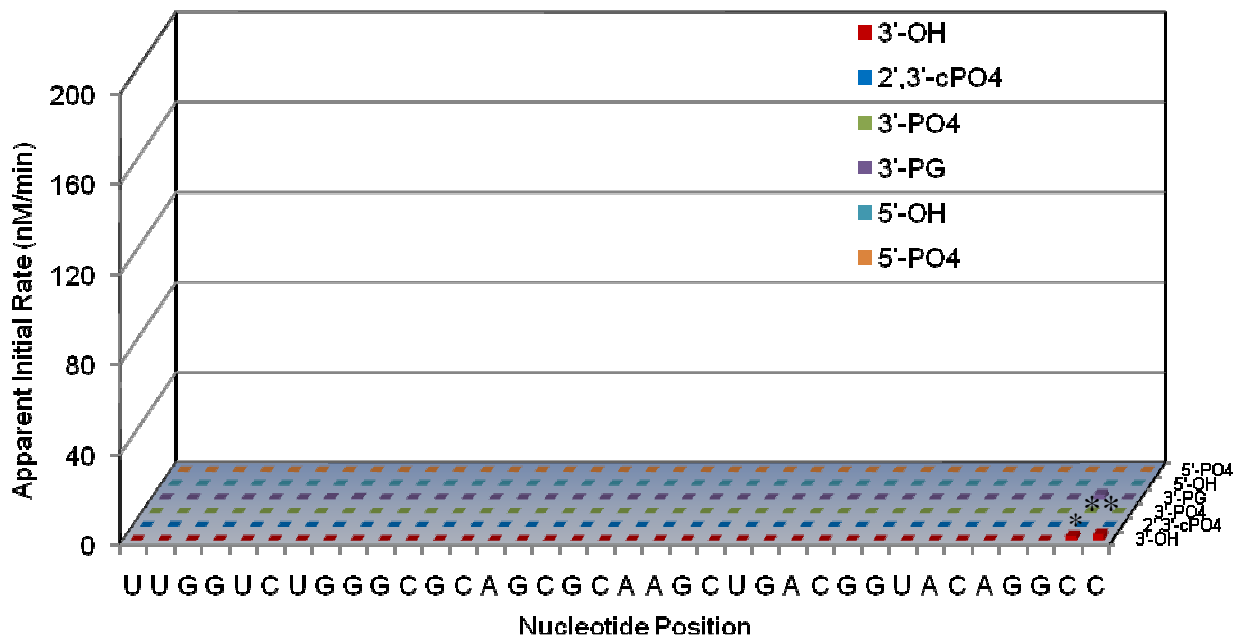

**Figure SM30.** Apparent initial rates of formation of RNA fragments containing the listed overhangs at the listed nascent termini, resulting from cleavage of 10  $\mu$ M FI-RRE RNA by 1 mM  $\text{H}_2\text{O}_2$  and 1 mM ascorbate, but lacking added catalyst. Effectively no cleavage was observed in the absence of catalyst. Apparent initial rates of disappearance of the full-length 36-mer FI-RRE RNA (\*\*\*) and the 35-mer impurity (\*) are also shown.



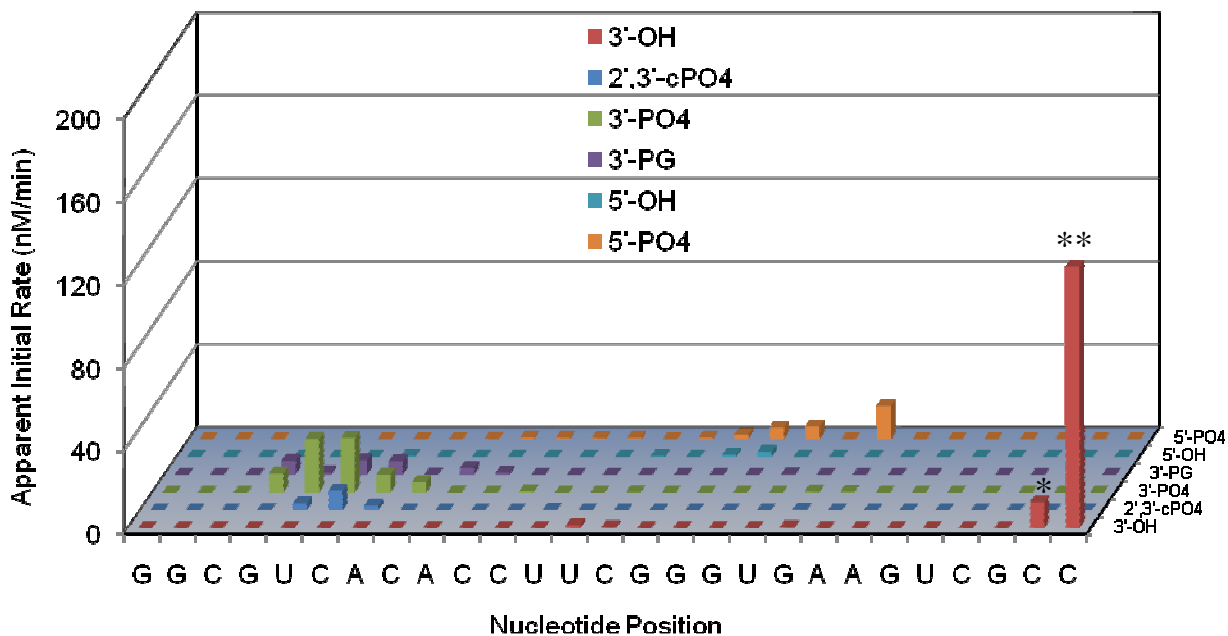

**Figure SM31.** Apparent initial rates of formation of RNA fragments containing the listed overhangs at the listed nascent termini, resulting from cleavage of 10  $\mu$ M FI-16S RNA by 10  $\mu$ M Cu-GGH, 1 mM  $H_2O_2$ , and 1 mM ascorbate. Apparent initial rates of disappearance of the full-length 27-mer FI-16S RNA (\*\*) and the 26-mer impurity (\*) are also shown.

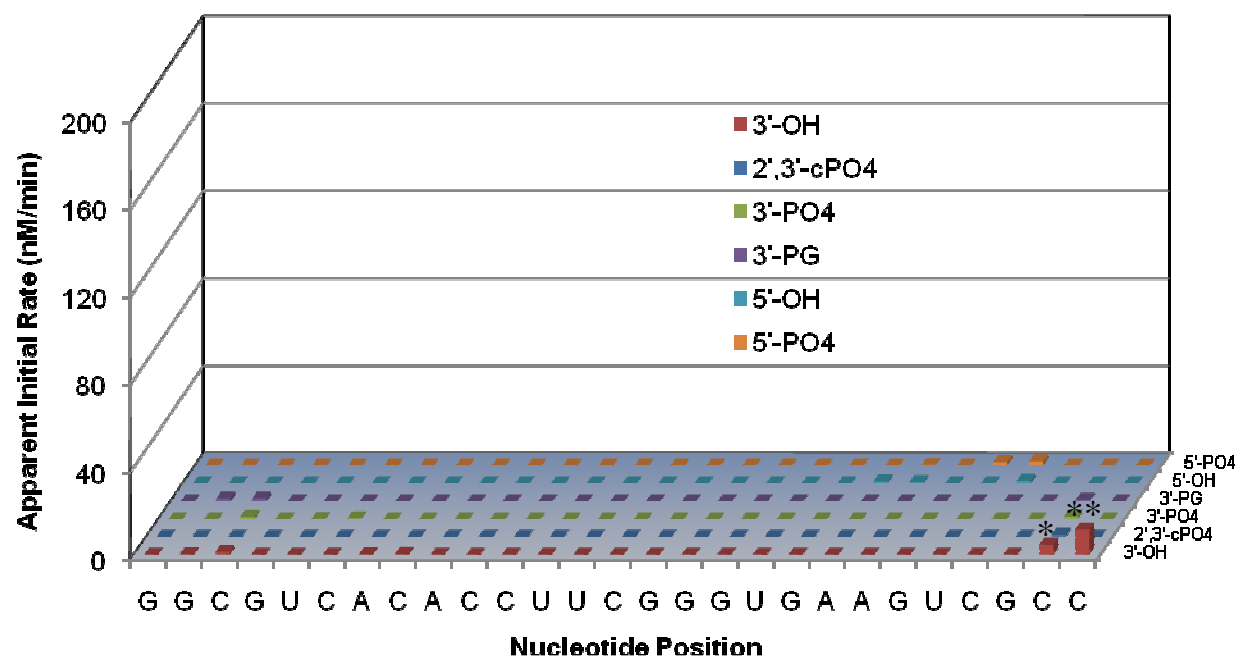

**Figure SM32.** Apparent initial rates of formation of RNA fragments containing the listed overhangs at the listed nascent termini, resulting from cleavage of 10  $\mu$ M FI-16S RNA by 1 mM  $H_2O_2$  and 1 mM ascorbate, but lacking added catalyst. Effectively no cleavage was observed in the absence of catalyst. Apparent initial rates of disappearance of the full-length 27-mer FI-16S RNA (\*\*\*) and the 26-mer impurity (\*) are also shown.

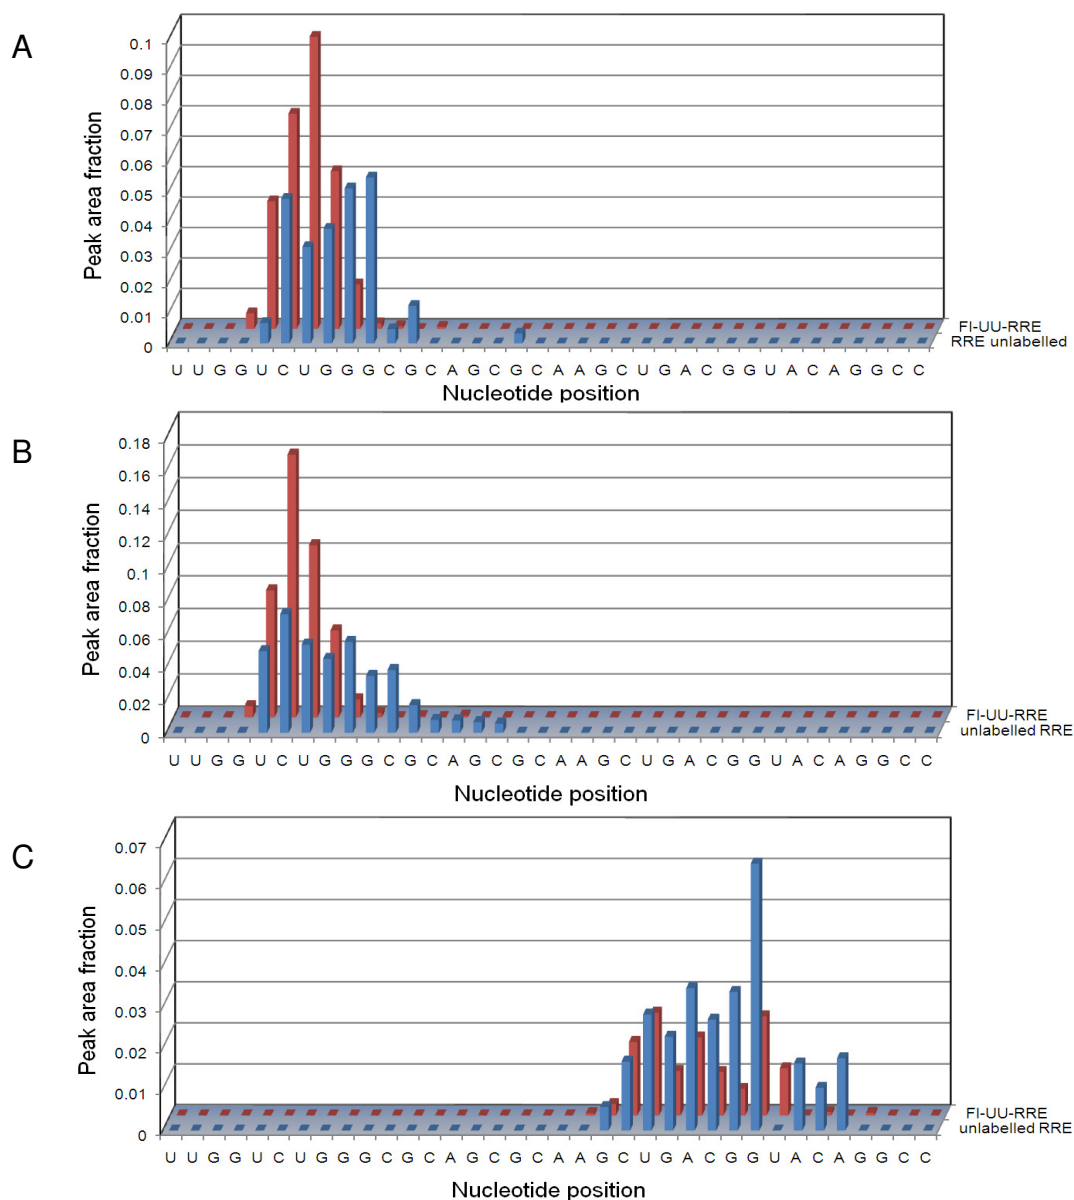

**Figure SM33.** Comparison of FI-RRE RNA (red, 36-mer) vs unlabelled RRE RNA (blue, 34-mer lacking 5'-FI-UU). Catalyst Fe-EDTA-Rev (10  $\mu$ M) and H<sub>2</sub>O<sub>2</sub>/ascorbate (1 mM) were incubated for 1 h with 10  $\mu$ M of either FI-RRE RNA or unlabelled RRE RNA, and the peak area fractions of all products were determined. (A) RNA cleavage fragments containing nascent terminal 3'-phosphates; (B) cleavage fragments containing nascent terminal 3'-phosphoglycolates; (C) cleavage fragments containing nascent terminal 5'-phosphates.

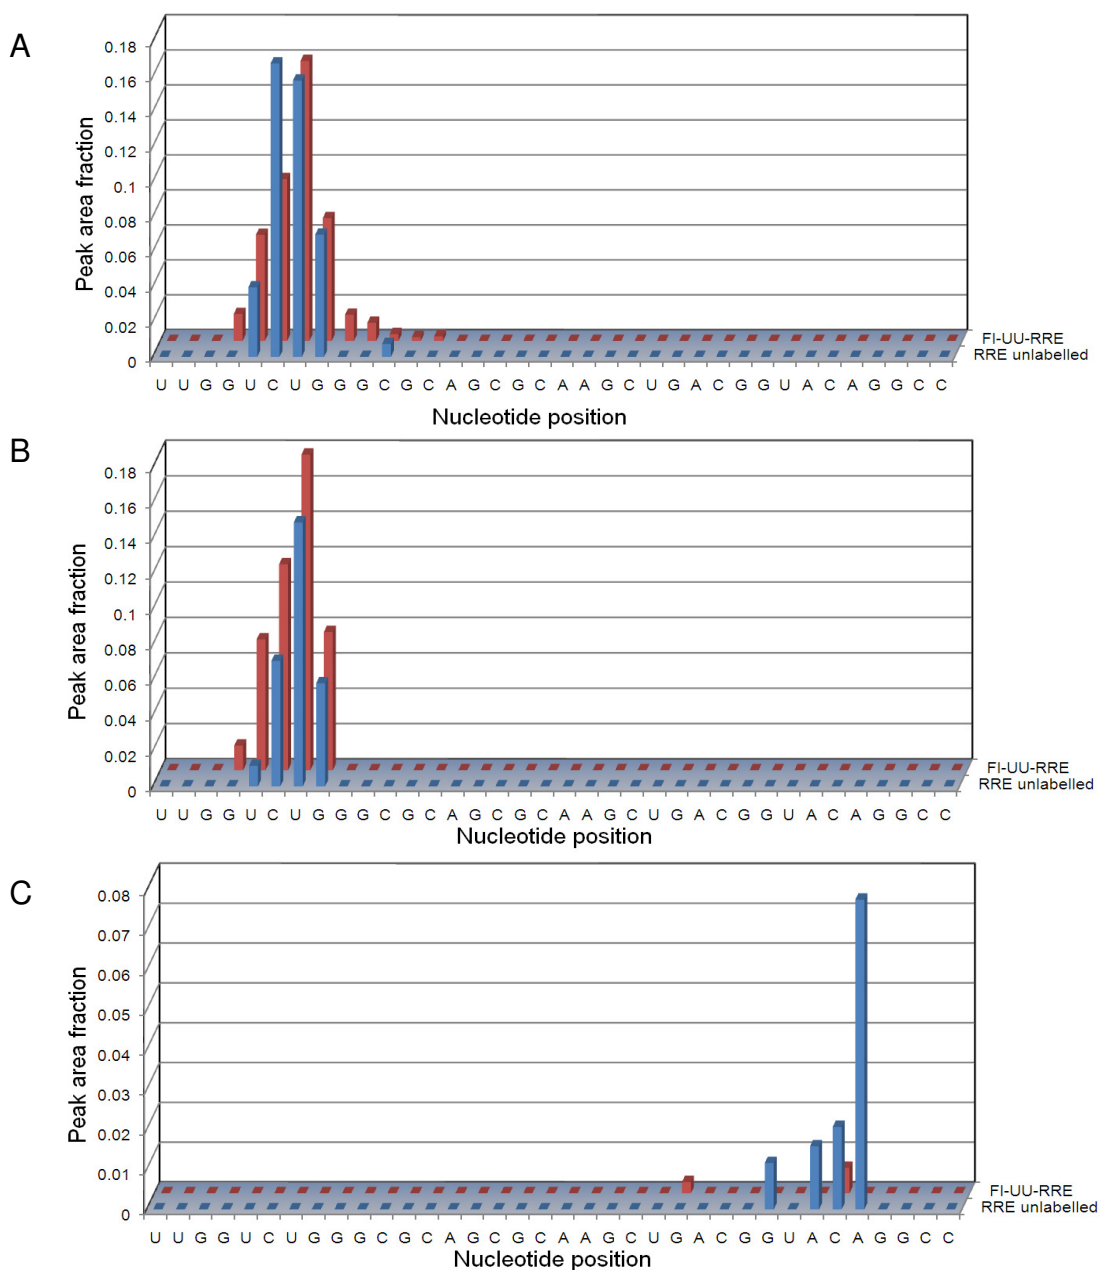

**Figure SM34.** Comparison of FI-RRE RNA (red, 36-mer) vs unlabelled RRE RNA (blue, 34-mer lacking 5'-FI-UU). Catalyst Cu-NTA-Rev (10  $\mu$ M) and H<sub>2</sub>O<sub>2</sub>/ascorbate (1 mM) were incubated for 1 h with 10  $\mu$ M of either FI-RRE RNA or unlabelled RRE RNA, and the peak area fractions of all products were determined. (A) RNA cleavage fragments containing nascent terminal 3'-phosphates; (B) cleavage fragments containing nascent terminal 3'-phosphoglycolates; (C) cleavage fragments containing nascent terminal 5'-phosphates.

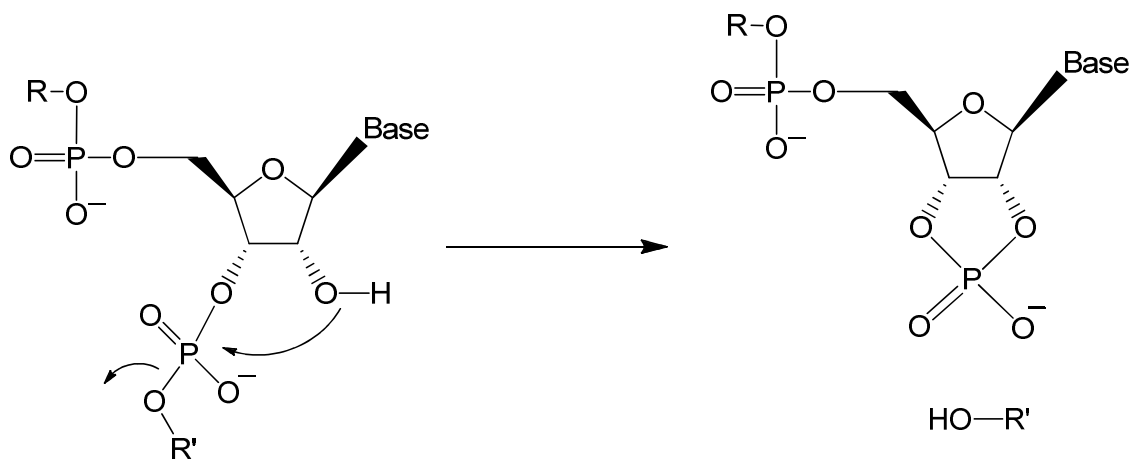

**Figure SM35.** Proposed mechanism for 2'-OH-mediated endonucleolytic cleavage of RNA to give fragments containing nascent 2',3'-cyclic phosphate or 5'-hydroxyl termini (c-fragments or y-fragments, respectively).

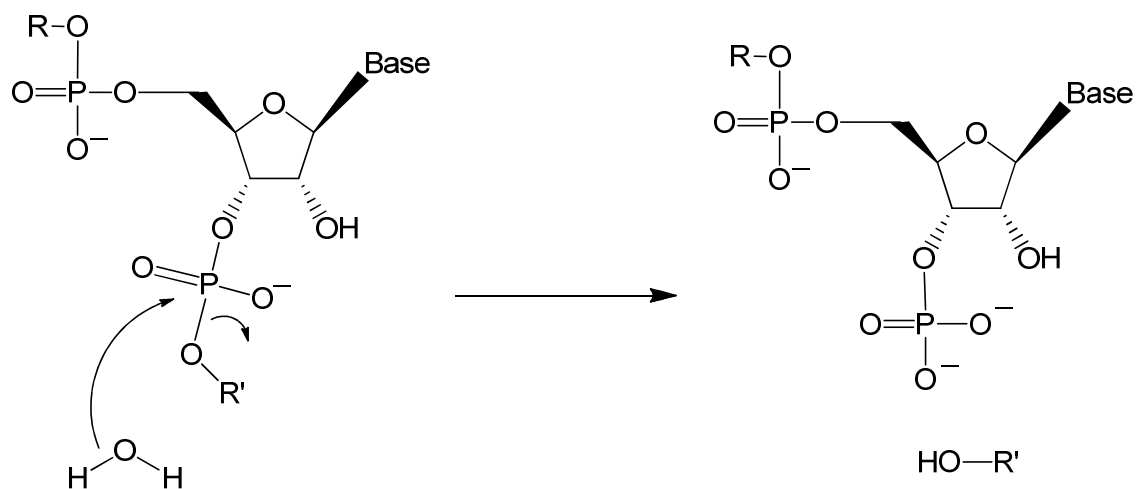

**Figure SM36.** Proposed mechanism for possible hydrolysis of RNA to give fragments containing nascent 3'-phosphate and 5'-hydroxyl termini (d-fragments and y-fragments, respectively). The mechanism may involve a 2',3'-cyclic phosphate intermediate, if the reaction occurs by 2'-OH-mediated attack; if this occurs, a 2'-phosphate is expected to result, in approximately equal abundance to the 3'-phosphate. It is also possible for hydrolysis to give fragments containing nascent 5'-phosphate and 3'-hydroxyl termini, depending on which P-O bond is hydrolyzed.

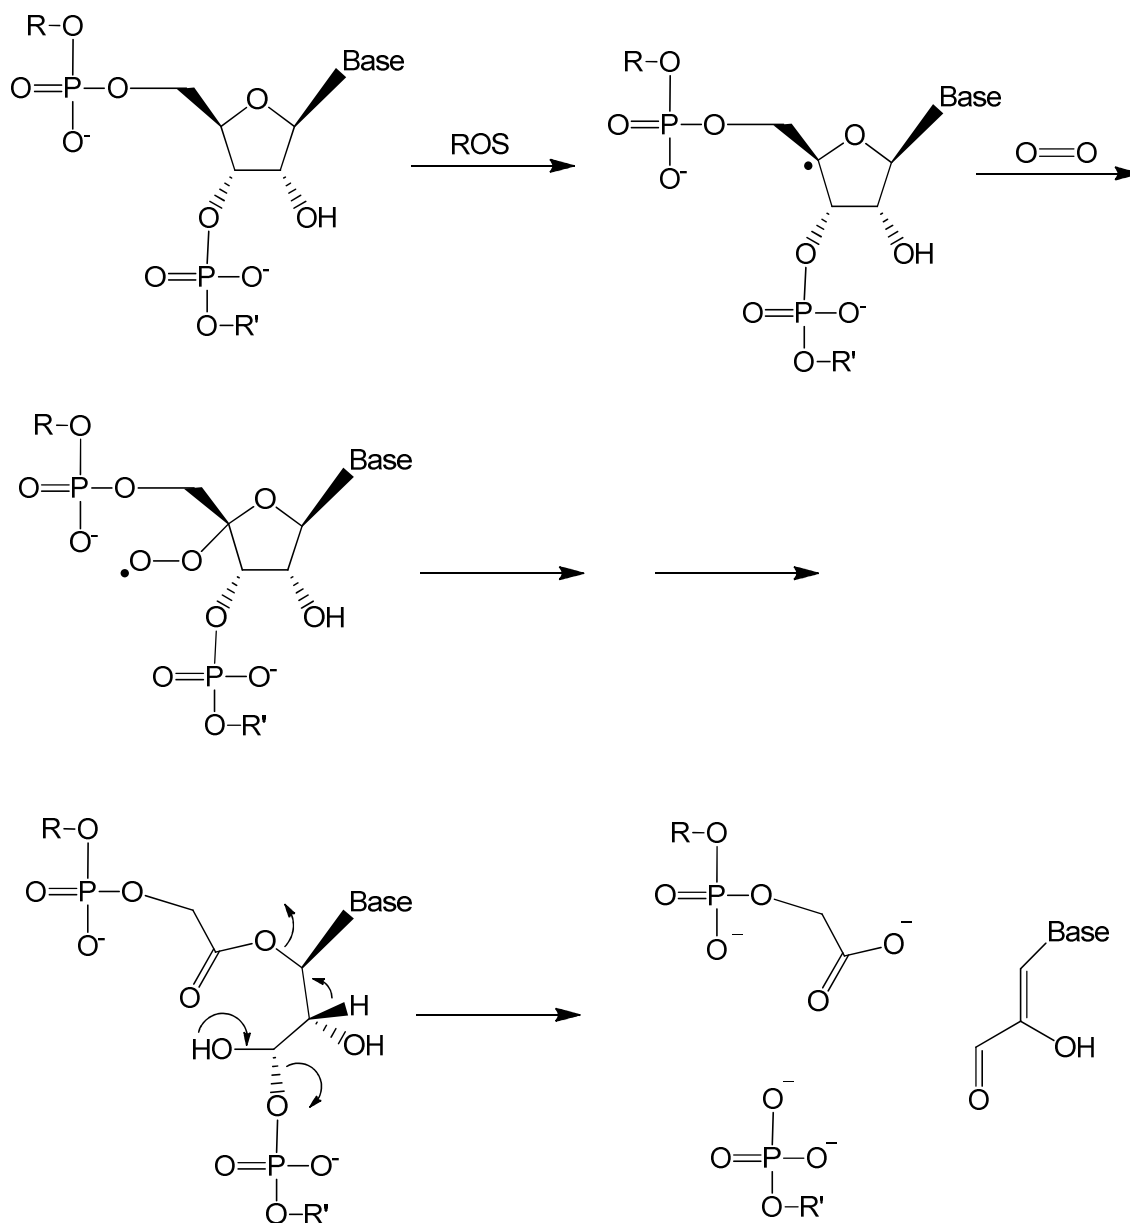

**Figure SM37.** Proposed mechanism for H-4 abstraction mediated by ROS generated by catalytic metal centers under aerobic conditions, observed by formation of 3'-phosphoglycolate and 5'-phosphate products. Slight mechanistic variations are possible that give the same RNA fragments.

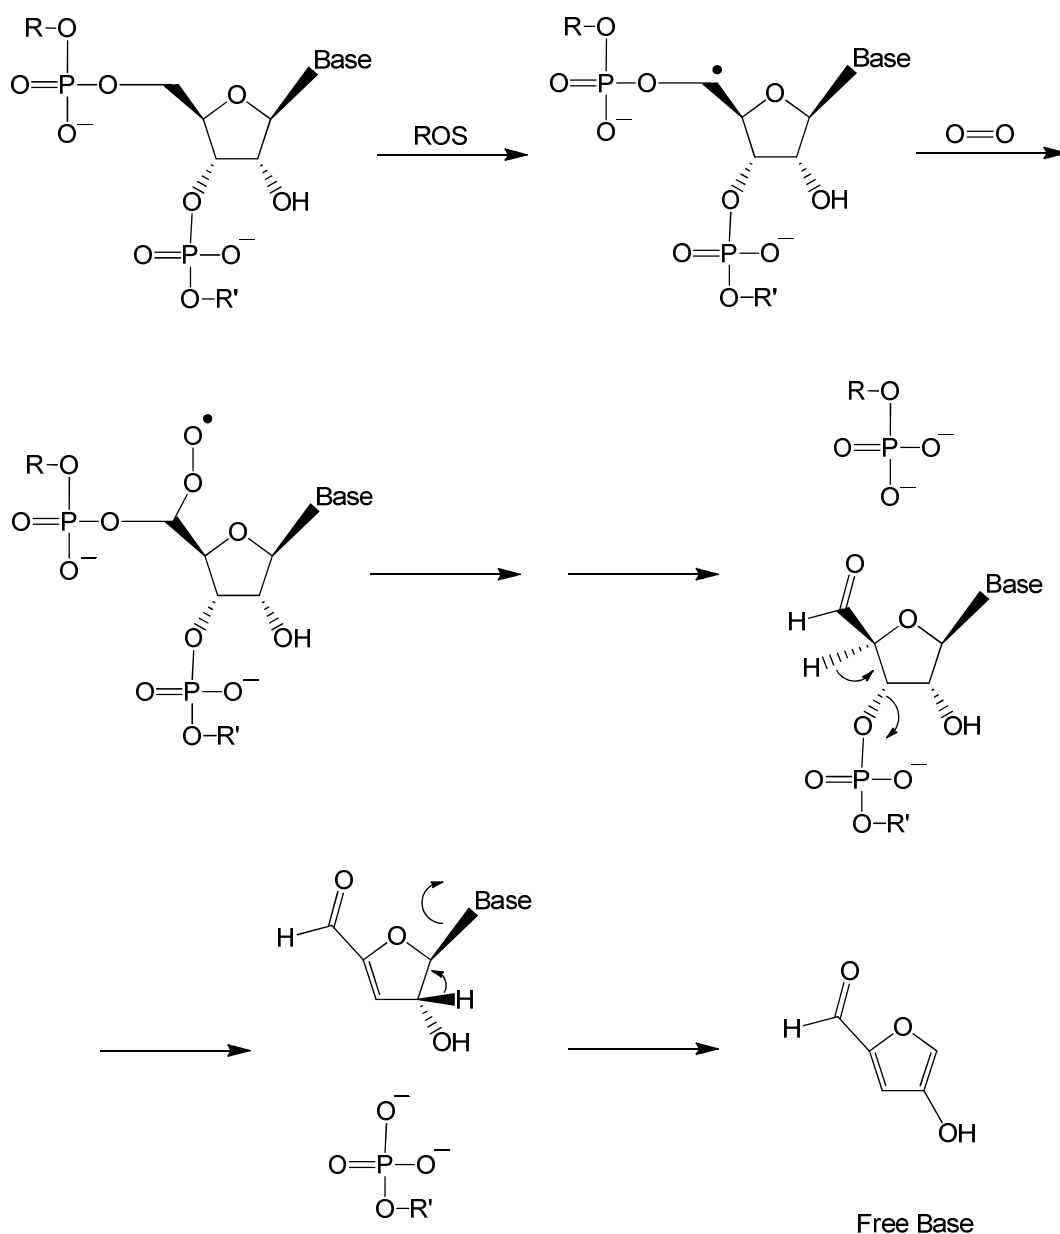

**Figure SM38.** Proposed mechanism for H-5 abstraction mediated by ROS generated by catalytic metal centers under aerobic conditions, observed by formation of 3'-phosphate products. The last two steps require additional heating. Slight mechanistic variations are possible that give the same RNA fragments.



```

#!/usr/bin/perl

print "\n";
print "\n";
print "Welcome to MassDaddy by Jeff Joyner, 2011\n";
print "\n";
print "Please enter the name of the file, with extension, containing the predicted masses.\n";

# enter file name
my $predmass = <>;

print "\n";
print "Please enter the name of the mass list file, with extension.\n";

# enter file name
my $masslist = <>;

# enter mass tolerance
print "\n";
print "Please enter the +/- mass tolerance for peak detection (ppm).\n";
my $tol = <>;

print "Please enter the desired filename of your output file.\n";

# enter file name
my $output = <>;

open output, ">$output";
print output "TheorMass\tObsdMass\tMassError(ppm)\tPosition\tOverhang\tPeakArea\n";

##### The first section organizes matched MS peaks by nucleotide position and overhang type
open (predmass, "$predmass");
my(@pred) = <predmass>; # read predicted mass file into list

foreach $pred (@pred)
{
    @predcolumns = split("\t", $pred);

    open (masslist, "$masslist");
    my(@list) = <masslist>; # read masslist into list

    foreach $list (@list) # loop thru list
    {
        @listcolumns = split("\t", $list);

        $high = $predcolumns[0] + ($predcolumns[0] * $tol / 1000000);
        $low = $predcolumns[0] - ($predcolumns[0] * $tol / 1000000);
        if ($listcolumns[0] < $high)
        {
            if ($listcolumns[0] > $low)
            {
                $error = ($listcolumns[0] - $predcolumns[0]) * 1000000 / $predcolumns[0];
                print output "$predcolumns[0]\t$listcolumns[0]\t$error\t$predcolumns[1]\t$predcolumns[2]\t$listcolumns[5]\n";
                $error = 999999999;
            }
        }
    }

    close (masslist, "$masslist");
    if ($error != 999999999)
    {
        print output "$predcolumns[0]\tno match\tno match\t$predcolumns[1]\t$predcolumns[2]\t0\n";
        $error = 111111111;
    }
    $error = 22222222;
}

close (predmass, "$predmass");

```

```

##### The following section organizes unmatched MS peaks
open (masslist, "$masslist");
my(@list) = <masslist>; # read masslist into list

foreach $list (@list) # loop thru list
{
    @listcolumns = split("\t", $list);

    open (predmass, "$predmass");
    my(@pred) = <predmass>; # read predicted mass file into list

    foreach $pred (@pred)
    {
        @predcolumns = split("\t", $pred);
        $high = $predcolumns[0] + ($predcolumns[0] * $tol / 1000000);
        $low = $predcolumns[0] - ($predcolumns[0] * $tol / 1000000);
        if ($listcolumns[0] < $high)
        {
            if ($listcolumns[0] > $low)
            {
                $error = 999999999;
            }
        }
    }

    close (predmass, "$predmass");
    if ($error != 999999999)
    {
        print output "unknown\t$listcolumns[0]\tunknown\tunknown\tunknown\t$listcolumns[5]\n";
        $error = 111111111;
    }
    $error = 22222222;
}

close (masslist, "$masslist");

#

```

**Figure SM39.** MassDaddy: Perl script code used for rapid automated assignment of mass spectra. MassDaddy requires user input of (1) a tab-delimited text file mass list containing observed m/z values (column 0 of 0-5) and peak areas (column 5 of 0-5) from a mass spectrum, as exported from Bruker FlexAnalysis software and saved by Microsoft Excel, (2) a tab-delimited text file containing (on each row) the predicted mass, the nucleotide position of the nascent overhang, and the identity of the nascent overhang, respectively, for each possible cleavage product (one product per row), and (3) the mass tolerance (ppm) used for matching. MassDaddy creates an output file for each spectrum with six columns (left to right): the theoretical m/z (Da), the observed m/z (Da), the mass matching error (ppm), the nucleotide position of the nascent overhang, the nascent overhang type, and the peak area, arranged by overhang type and sequence. Unassigned peaks are also provided in the output file. MassDaddy requires that Perl is installed on the computer and is used from the command prompt. Mass list files and predicted mass files must be placed in the same folder as MassDaddy before use. To use MassDaddy, copy the above text into a text file, and save as a .pl file.

**ultrafleXtreme Series MALDI TOF/TOF Mass Spectrometers (Bruker)**

Resolution: > 40,000

**autoflex III Series MALDI-TOF & TOF/TOF Systems (Bruker)**

Resolution: > 20,000

Mass Range: 700 to 5000 Da

**Axima Assurance MALDI Time of Flight Mass Spectrometer (Shimadzu)**

Resolution: >5000 FWHM

Mass Range: 1 kDa to 500 kDa

**Axima Confidence MALDI TOF Mass Spectrometer (Shimadzu)**

Resolution: 5000 FWHM in linear mode; 15000 FWHM in reflectron mode

Mass Range: 1 kDa to 500 kDa

**Axima Performance MALDI TOF TOF Mass Spectrometer (Shimadzu)**

Resolution: >20,000 FWHM (reflectron mode)

Mass Range: 1 kDa to 500 kDa

**Figure SM40.** Comparison of common MALDI-TOF mass spectrometers. Resolutions and mass ranges listed were given by manufacturers/vendors.

## **SM References**

- (1) McKenzie, J. L.; Duyvestyn, J. M.; Smith, T. B., K.; Mackay, J.; Cursons, R.; Cook, G. M.; Arcus, V. L. *RNA* **2012**, *18*, 1267.
- (2) Joyner, J. C.; Cowan, J. A. *J. Am. Chem. Soc.* **2011**, *133*, 9912.
